# Supplementary material for: Prevalence of HTLV-1/2 in Pregnant Women Living in the Metropolitan Area of Rio de Janeiro
Source: PubMed Central journal article supplement (PMC4154655; doi:10.1371/journal.pntd.0003146), 2014-09-04
Supplement: pntd.0003146.s003.pdf [file pntd.0003146.s003.pdf]

# Epi Info

## [Results Library](#)

*CurrentView:* C:\Users\nadia.rodriques\Dropbox\pesquisas2014\Dani\bancos\Projeto ApoioHU  
atualizado~24122013.MDB:viewPRINCIPAL

*Relate:* viewIDADOSSOCIODEMOGRÁFICOS

*Relate:* viewRESULTADOEXAMESHUPE

*Record Count:* **1204** (Deletedrecordsexcluded)

## FREQ HTLVHUPE

## [Next Procedure](#)

### [Forward](#)

| HTLV         | Frequency | Percent | Cum Percent |  |
|--------------|-----------|---------|-------------|--|
| Yes          | 8         | 0.7%    | 0.7%        |  |
| No           | 1196      | 99.3%   | 100.0%      |  |
| <b>Total</b> | 1204      | 100.0%  | 100.0%      |  |

### 95% ConfLimits

Yes 0.3% 1.4%

No 98.6% 99.7%

## [PreviousDataset Results Library](#)

## FREQ ETNIA

[Next Procedure](#)

[Forward](#)

| ETNIA / COR  | Frequency | Percent | Cum Percent |                                                                                    |
|--------------|-----------|---------|-------------|------------------------------------------------------------------------------------|
| 1            | 352       | 29.3%   | 29.3%       |   |
| 2            | 242       | 20.2%   | 49.5%       |   |
| 3            | 598       | 49.8%   | 99.3%       |   |
| 4            | 8         | 0.7%    | 100.0%      |   |
| <b>Total</b> | 1200      | 100.0%  | 100.0%      |  |

### 95% ConfLimits

1 26.8% 32.0%

2 18.0% 22.6%

3 47.0% 52.7%

4 0.3% 1.4%

[PreviousDataset Results Library](#)

## FREQ RENDAFAMMENS

[Next Procedure](#)

[Forward](#)

| <b>RENDA FAMILIAR MENSAL ESTIMADA (EM SALÁRIOS MÍNIMOS)</b> | <b>Frequency</b> | <b>Percent</b> | <b>Cum Percent</b> |                                                                                     |
|-------------------------------------------------------------|------------------|----------------|--------------------|-------------------------------------------------------------------------------------|
| <b>0</b>                                                    | 2                | 0.2%           | 0.2%               |                                                                                     |
| <b>1</b>                                                    | 638              | 53.4%          | 53.6%              |  |
| <b>2</b>                                                    | 359              | 30.0%          | 83.6%              |  |
| <b>3</b>                                                    | 122              | 10.2%          | 93.8%              |  |
| <b>4</b>                                                    | 38               | 3.2%           | 97.0%              |  |
| <b>5</b>                                                    | 14               | 1.2%           | 98.2%              |  |
| <b>6</b>                                                    | 22               | 1.8%           | 100.0%             |  |
| <b>Total</b>                                                | 1195             | 100.0%         | 100.0%             |  |

**95% ConfLimits**

0 0.0% 0.7%  
1 50.5% 56.2%  
2 27.5% 32.7%  
3 8.6% 12.1%  
4 2.3% 4.4%  
5 0.7% 2.0%  
6 1.2% 2.8%

[PreviousDataset Results Library](#)

**FREQ ESCOLARIDADE**

[Next Procedure](#)

[Forward](#)

| ESCOLARIDADE | Frequency | Percent | Cum Percent |   |
|--------------|-----------|---------|-------------|---|
| 1            | 3         | 0.3%    | 0.3%        |   |
| 2            | 83        | 6.9%    | 7.2%        | ■ |
| 3            | 223       | 18.6%   | 25.8%       | ■ |
| 4            | 119       | 9.9%    | 35.7%       | ■ |
| 5            | 255       | 21.3%   | 56.9%       | ■ |
| 6            | 436       | 36.3%   | 93.3%       | ■ |
| 7            | 81        | 6.8%    | 100.0%      | ■ |
| <b>Total</b> | 1200      | 100.0%  | 100.0%      | ■ |

**95% ConfLimits**

1 0.1% 0.8%  
2 5.6% 8.5%  
3 16.4% 20.9%  
4 8.3% 11.8%  
5 19.0% 23.7%  
6 33.6% 39.1%  
7 5.4% 8.4%

[PreviousDataset Results Library](#)

## FREQ ESTADOCONJUGAL

[Next Procedure](#)

[Forward](#)

| ESTADO CONJUGAL | Frequency | Percent | Cum Percent |                                                                                    |
|-----------------|-----------|---------|-------------|------------------------------------------------------------------------------------|
| 1               | 888       | 73.8%   | 73.8%       | 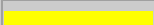 |
| 2               | 298       | 24.8%   | 98.6%       |  |
| 3               | 16        | 1.3%    | 99.9%       |   |
| 4               | 1         | 0.1%    | 100.0%      |                                                                                    |
| <b>Total</b>    | 1203      | 100.0%  | 100.0%      |  |

### 95% ConfLimits

1 71.2% 76.3%

2 22.4% 27.3%

3 0.8% 2.2%

4 0.0% 0.5%

[PreviousDataset Results Library](#)

## MEANS NUMPARCSEXVIDA HTLVHUPE

[Next Procedure](#)

[Forward](#)

| <b>HTLV</b>                           |            |           |              |
|---------------------------------------|------------|-----------|--------------|
| <b>NÚM DE PARCEIROS ATÉ O MOMENTO</b> | <b>Yes</b> | <b>No</b> | <b>TOTAL</b> |
| <b>1</b>                              | 1          | 325       | 326          |
| Row %                                 | 0.3        | 99.7      | 100.0        |
| Col %                                 | 12.5       | 27.6      | 27.5         |
| <b>2</b>                              | 2          | 229       | 231          |
| Row %                                 | 0.9        | 99.1      | 100.0        |
| Col %                                 | 25.0       | 19.4      | 19.5         |
| <b>3</b>                              | 1          | 235       | 236          |
| Row %                                 | 0.4        | 99.6      | 100.0        |
| Col %                                 | 12.5       | 19.9      | 19.9         |
| <b>4</b>                              | 1          | 136       | 137          |
| Row %                                 | 0.7        | 99.3      | 100.0        |
| Col %                                 | 12.5       | 11.5      | 11.5         |
| <b>5</b>                              | 2          | 100       | 102          |
| Row %                                 | 2.0        | 98.0      | 100.0        |
| Col %                                 | 25.0       | 8.5       | 8.6          |
| <b>6</b>                              | 0          | 38        | 38           |
| Row %                                 | 0.0        | 100.0     | 100.0        |
| Col %                                 | 0.0        | 3.2       | 3.2          |
| <b>7</b>                              | 0          | 15        | 15           |
| Row %                                 | 0.0        | 100.0     | 100.0        |
| Col %                                 | 0.0        | 1.3       | 1.3          |
| <b>8</b>                              | 0          | 17        | 17           |
| Row %                                 | 0.0        | 100.0     | 100.0        |

|  |           |      |       |       |
|--|-----------|------|-------|-------|
|  | Col %     | 0.0  | 1.4   | 1.4   |
|  | <b>9</b>  | 0    | 6     | 6     |
|  | Row %     | 0.0  | 100.0 | 100.0 |
|  | Col %     | 0.0  | 0.5   | 0.5   |
|  | <b>10</b> | 1    | 33    | 34    |
|  | Row %     | 2.9  | 97.1  | 100.0 |
|  | Col %     | 12.5 | 2.8   | 2.9   |
|  | <b>11</b> | 0    | 2     | 2     |
|  | Row %     | 0.0  | 100.0 | 100.0 |
|  | Col %     | 0.0  | 0.2   | 0.2   |
|  | <b>12</b> | 0    | 4     | 4     |
|  | Row %     | 0.0  | 100.0 | 100.0 |
|  | Col %     | 0.0  | 0.3   | 0.3   |
|  | <b>13</b> | 0    | 2     | 2     |
|  | Row %     | 0.0  | 100.0 | 100.0 |
|  | Col %     | 0.0  | 0.2   | 0.2   |
|  | <b>14</b> | 0    | 1     | 1     |
|  | Row %     | 0.0  | 100.0 | 100.0 |
|  | Col %     | 0.0  | 0.1   | 0.1   |
|  | <b>15</b> | 0    | 8     | 8     |
|  | Row %     | 0.0  | 100.0 | 100.0 |
|  | Col %     | 0.0  | 0.7   | 0.7   |
|  | <b>20</b> | 0    | 10    | 10    |
|  | Row %     | 0.0  | 100.0 | 100.0 |
|  | Col %     | 0.0  | 0.8   | 0.8   |
|  | <b>25</b> | 0    | 2     | 2     |
|  | Row %     | 0.0  | 100.0 | 100.0 |

|  |              |       |       |       |
|--|--------------|-------|-------|-------|
|  | Col %        | 0.0   | 0.2   | 0.2   |
|  | <b>30</b>    | 0     | 5     | 5     |
|  | Row %        | 0.0   | 100.0 | 100.0 |
|  | Col %        | 0.0   | 0.4   | 0.4   |
|  | <b>34</b>    | 0     | 1     | 1     |
|  | Row %        | 0.0   | 100.0 | 100.0 |
|  | Col %        | 0.0   | 0.1   | 0.1   |
|  | <b>37</b>    | 0     | 1     | 1     |
|  | Row %        | 0.0   | 100.0 | 100.0 |
|  | Col %        | 0.0   | 0.1   | 0.1   |
|  | <b>40</b>    | 0     | 1     | 1     |
|  | Row %        | 0.0   | 100.0 | 100.0 |
|  | Col %        | 0.0   | 0.1   | 0.1   |
|  | <b>50</b>    | 0     | 3     | 3     |
|  | Row %        | 0.0   | 100.0 | 100.0 |
|  | Col %        | 0.0   | 0.3   | 0.3   |
|  | <b>99</b>    | 0     | 5     | 5     |
|  | Row %        | 0.0   | 100.0 | 100.0 |
|  | Col %        | 0.0   | 0.4   | 0.4   |
|  | <b>TOTAL</b> | 8     | 1179  | 1187  |
|  | Row %        | 0.7   | 99.3  | 100.0 |
|  | Col %        | 100.0 | 100.0 | 100.0 |

### Descriptive Statistics for Each Value of Crosstab Variable

Obs    Total    Mean    Variance    StdDev



|         |        |           |        |         |         |
|---------|--------|-----------|--------|---------|---------|
| Yes     | 8      | 32.0000   | 4.0000 | 8.0000  | 2.8284  |
| No      | 1179   | 4771.0000 | 4.0466 | 58.7729 | 7.6663  |
| Minimum | 25%    | Median    | 75%    | Maximum | Mode    |
| Yes     | 1.0000 | 2.0000    | 3.5000 | 5.0000  | 10.0000 |
| No      | 1.0000 | 1.0000    | 3.0000 | 4.0000  | 99.0000 |

### **ANOVA, a Parametric Test for Inequality of Population Means**

(For normally distributed data only)

| Variation | SS         | df   | MS      | F statistic |
|-----------|------------|------|---------|-------------|
| Between   | 0.0173     | 1    | 0.0173  | 0.0003      |
| Within    | 69290.4343 | 1185 | 58.4729 |             |
| Total     | 69290.4516 | 1186 |         |             |

T Statistic = 0.0172

P-value = 0.9863

### **Bartlett's Test for Inequality of Population Variances**

Bartlett's chi square= 7.5380 df=1 P value=0.0060

A small p-value (e.g., less than 0.05 suggests that the variances are not homogeneous and that the ANOVA may not be appropriate.

**Mann-Whitney/Wilcoxon Two-Sample Test (Kruskal-Wallis test for two groups)**

Kruskal-Wallis H (equivalent to Chi square) = .9455

Degrees of freedom = 1

P value = 0.3309

[Previous Dataset Results Library](#)

**FREQ USOPRESERVANTESGRAV**

[Next Procedure](#)

[Forward](#)

| USO DE PRESERVATIVO ANTES DA GRAVIDEZ | Frequency | Percent | Cum Percent |  |
|---------------------------------------|-----------|---------|-------------|--|
| 1                                     | 200       | 16.6%   | 16.6%       |  |
| 2                                     | 521       | 43.3%   | 59.9%       |  |
| 3                                     | 482       | 40.1%   | 100.0%      |  |
| <b>Total</b>                          | 1203      | 100.0%  | 100.0%      |  |

**95% ConfLimits**

1 14.6% 18.9%

2 40.5% 46.2%

3 37.3% 42.9%

## MEANS Gesta HTLVHUPE

[Next Procedure](#)

---

[Forward](#)

| HTLVHUPE |      |       |       |
|----------|------|-------|-------|
| Gesta    | Yes  | No    | TOTAL |
| <b>1</b> | 2    | 453   | 455   |
| Row %    | 0,4  | 99,6  | 100,0 |
| Col %    | 25,0 | 43,3  | 43,2  |
| <b>2</b> | 1    | 275   | 276   |
| Row %    | 0,4  | 99,6  | 100,0 |
| Col %    | 12,5 | 26,3  | 26,2  |
| <b>3</b> | 2    | 146   | 148   |
| Row %    | 1,4  | 98,6  | 100,0 |
| Col %    | 25,0 | 14,0  | 14,0  |
| <b>4</b> | 2    | 97    | 99    |
| Row %    | 2,0  | 98,0  | 100,0 |
| Col %    | 25,0 | 9,3   | 9,4   |
| <b>5</b> | 1    | 36    | 37    |
| Row %    | 2,7  | 97,3  | 100,0 |
| Col %    | 12,5 | 3,4   | 3,5   |
| <b>6</b> | 0    | 19    | 19    |
| Row %    | 0,0  | 100,0 | 100,0 |
| Col %    | 0,0  | 1,8   | 1,8   |

|              |       |       |       |
|--------------|-------|-------|-------|
| <b>7</b>     | 0     | 8     | 8     |
| Row %        | 0,0   | 100,0 | 100,0 |
| Col %        | 0,0   | 0,8   | 0,8   |
| <b>8</b>     | 0     | 3     | 3     |
| Row %        | 0,0   | 100,0 | 100,0 |
| Col %        | 0,0   | 0,3   | 0,3   |
| <b>9</b>     | 0     | 4     | 4     |
| Row %        | 0,0   | 100,0 | 100,0 |
| Col %        | 0,0   | 0,4   | 0,4   |
| <b>10</b>    | 0     | 4     | 4     |
| Row %        | 0,0   | 100,0 | 100,0 |
| Col %        | 0,0   | 0,4   | 0,4   |
| <b>11</b>    | 0     | 1     | 1     |
| Row %        | 0,0   | 100,0 | 100,0 |
| Col %        | 0,0   | 0,1   | 0,1   |
| <b>TOTAL</b> | 8     | 1046  | 1054  |
| Row %        | 0,8   | 99,2  | 100,0 |
| Col %        | 100,0 | 100,0 | 100,0 |

### Descriptive Statistics for Each Value of Crosstab Variable

|     | Obs     | Total     | Mean   | Variance | Std Dev |        |
|-----|---------|-----------|--------|----------|---------|--------|
| Yes | 8       | 23,0000   | 2,8750 | 2,1250   | 1,4577  |        |
| No  | 1046    | 2290,0000 | 2,1893 | 2,3144   | 1,5213  |        |
|     | Minimum | 25%       | Median | 75%      | Maximum | Mode   |
| Yes | 1,0000  | 1,5000    | 3,0000 | 4,0000   | 5,0000  | 1,0000 |

No 1,0000 1,0000 2,0000 3,0000 11,0000 1,0000

### **ANOVA, a Parametric Test for Inequality of Population Means**

(For normally distributed data only)

| Variation | SS        | df   | MS     | F statistic |
|-----------|-----------|------|--------|-------------|
| Between   | 3,7330    | 1    | 3,7330 | 1,6138      |
| Within    | 2433,3951 | 1052 | 2,3131 |             |
| Total     | 2437,1281 | 1053 |        |             |

T Statistic = 1,2704

P-value = 0,2040

### **Bartlett's Test for Inequality of Population Variances**

Bartlett's chi square= 0,0235 df=1 P value=0,8781

A small p-value (e.g., less than 0.05 suggests that the variances are not homogeneous and that the ANOVA may not be appropriate.

### **Mann-Whitney/Wilcoxon Two-Sample Test (Kruskal-Wallis test for two groups)**

Kruskal-Wallis H (equivalent to Chi square) = 2,5406

Degrees of freedom = 1

P value = 0,1110

[PreviousDataset Results Library](#)

### MEANS IDADE HTLVHUPE

[Next Procedure](#)

[Forward](#)

| HTLV      |     |       |       |
|-----------|-----|-------|-------|
| IDADE     | Yes | No    | TOTAL |
| <b>13</b> | 0   | 1     | 1     |
| Row %     | 0.0 | 100.0 | 100.0 |
| Col %     | 0.0 | 0.1   | 0.1   |
| <b>14</b> | 0   | 5     | 5     |
| Row %     | 0.0 | 100.0 | 100.0 |
| Col %     | 0.0 | 0.4   | 0.4   |
| <b>15</b> | 0   | 21    | 21    |
| Row %     | 0.0 | 100.0 | 100.0 |
| Col %     | 0.0 | 1.8   | 1.8   |
| <b>16</b> | 0   | 40    | 40    |
| Row %     | 0.0 | 100.0 | 100.0 |
| Col %     | 0.0 | 3.4   | 3.3   |
| <b>17</b> | 0   | 60    | 60    |

|           |      |       |       |
|-----------|------|-------|-------|
| Row %     | 0.0  | 100.0 | 100.0 |
| Col %     | 0.0  | 5.0   | 5.0   |
| <b>18</b> | 1    | 82    | 83    |
| Row %     | 1.2  | 98.8  | 100.0 |
| Col %     | 12.5 | 6.9   | 6.9   |
| <b>19</b> | 0    | 80    | 80    |
| Row %     | 0.0  | 100.0 | 100.0 |
| Col %     | 0.0  | 6.7   | 6.7   |
| <b>20</b> | 0    | 82    | 82    |
| Row %     | 0.0  | 100.0 | 100.0 |
| Col %     | 0.0  | 6.9   | 6.8   |
| <b>21</b> | 1    | 73    | 74    |
| Row %     | 1.4  | 98.6  | 100.0 |
| Col %     | 12.5 | 6.1   | 6.2   |
| <b>22</b> | 0    | 73    | 73    |
| Row %     | 0.0  | 100.0 | 100.0 |
| Col %     | 0.0  | 6.1   | 6.1   |
| <b>23</b> | 0    | 68    | 68    |
| Row %     | 0.0  | 100.0 | 100.0 |
| Col %     | 0.0  | 5.7   | 5.7   |
| <b>24</b> | 0    | 61    | 61    |
| Row %     | 0.0  | 100.0 | 100.0 |
| Col %     | 0.0  | 5.1   | 5.1   |
| <b>25</b> | 0    | 73    | 73    |
| Row %     | 0.0  | 100.0 | 100.0 |
| Col %     | 0.0  | 6.1   | 6.1   |
| <b>26</b> | 1    | 50    | 51    |

|           |      |       |       |
|-----------|------|-------|-------|
| Row %     | 2.0  | 98.0  | 100.0 |
| Col %     | 12.5 | 4.2   | 4.3   |
| <b>27</b> | 0    | 54    | 54    |
| Row %     | 0.0  | 100.0 | 100.0 |
| Col %     | 0.0  | 4.5   | 4.5   |
| <b>28</b> | 0    | 44    | 44    |
| Row %     | 0.0  | 100.0 | 100.0 |
| Col %     | 0.0  | 3.7   | 3.7   |
| <b>29</b> | 1    | 37    | 38    |
| Row %     | 2.6  | 97.4  | 100.0 |
| Col %     | 12.5 | 3.1   | 3.2   |
| <b>30</b> | 1    | 44    | 45    |
| Row %     | 2.2  | 97.8  | 100.0 |
| Col %     | 12.5 | 3.7   | 3.8   |
| <b>31</b> | 0    | 41    | 41    |
| Row %     | 0.0  | 100.0 | 100.0 |
| Col %     | 0.0  | 3.4   | 3.4   |
| <b>32</b> | 0    | 35    | 35    |
| Row %     | 0.0  | 100.0 | 100.0 |
| Col %     | 0.0  | 2.9   | 2.9   |
| <b>33</b> | 1    | 19    | 20    |
| Row %     | 5.0  | 95.0  | 100.0 |
| Col %     | 12.5 | 1.6   | 1.7   |
| <b>34</b> | 0    | 26    | 26    |
| Row %     | 0.0  | 100.0 | 100.0 |
| Col %     | 0.0  | 2.2   | 2.2   |
| <b>35</b> | 2    | 26    | 28    |



|           |      |       |       |
|-----------|------|-------|-------|
| Row %     | 7.1  | 92.9  | 100.0 |
| Col %     | 25.0 | 2.2   | 2.3   |
| <b>36</b> | 0    | 19    | 19    |
| Row %     | 0.0  | 100.0 | 100.0 |
| Col %     | 0.0  | 1.6   | 1.6   |
| <b>37</b> | 0    | 21    | 21    |
| Row %     | 0.0  | 100.0 | 100.0 |
| Col %     | 0.0  | 1.8   | 1.8   |
| <b>38</b> | 0    | 18    | 18    |
| Row %     | 0.0  | 100.0 | 100.0 |
| Col %     | 0.0  | 1.5   | 1.5   |
| <b>39</b> | 0    | 12    | 12    |
| Row %     | 0.0  | 100.0 | 100.0 |
| Col %     | 0.0  | 1.0   | 1.0   |
| <b>40</b> | 0    | 12    | 12    |
| Row %     | 0.0  | 100.0 | 100.0 |
| Col %     | 0.0  | 1.0   | 1.0   |
| <b>41</b> | 0    | 8     | 8     |
| Row %     | 0.0  | 100.0 | 100.0 |
| Col %     | 0.0  | 0.7   | 0.7   |
| <b>42</b> | 0    | 3     | 3     |
| Row %     | 0.0  | 100.0 | 100.0 |
| Col %     | 0.0  | 0.3   | 0.3   |
| <b>43</b> | 0    | 3     | 3     |
| Row %     | 0.0  | 100.0 | 100.0 |
| Col %     | 0.0  | 0.3   | 0.3   |
| <b>44</b> | 0    | 1     | 1     |

|              |       |       |       |
|--------------|-------|-------|-------|
| Row %        | 0.0   | 100.0 | 100.0 |
| Col %        | 0.0   | 0.1   | 0.1   |
| <b>TOTAL</b> | 8     | 1192  | 1200  |
| Row %        | 0.7   | 99.3  | 100.0 |
| Col %        | 100.0 | 100.0 | 100.0 |

### Descriptive Statistics for Each Value of Crosstab Variable

|     | Obs     | Total      | Mean    | Variance | StdDev  |         |
|-----|---------|------------|---------|----------|---------|---------|
| Yes | 8       | 227.0000   | 28.3750 | 39.9821  | 6.3231  |         |
| No  | 1192    | 29601.0000 | 24.8331 | 42.0939  | 6.4880  |         |
|     | Minimum | 25%        | Median  | 75%      | Maximum | Mode    |
| Yes | 18.0000 | 23.5000    | 29.5000 | 34.0000  | 35.0000 | 35.0000 |
| No  | 13.0000 | 20.0000    | 24.0000 | 29.0000  | 44.0000 | 18.0000 |

### ANOVA, a Parametric Test for Inequality of Population Means

(For normally distributed data only)

| Variation | SS         | df   | MS      | F statistic |
|-----------|------------|------|---------|-------------|
| Between   | 99.6940    | 1    | 99.6940 | 2.3691      |
| Within    | 50413.6527 | 1198 | 42.0815 |             |
| Total     | 50513.3467 | 1199 |         |             |

T Statistic = 1.5392

P-value = 0.1238

### **Bartlett's Test for Inequality of Population Variances**

Bartlett's chi square= 0.0087 df=1 P value=0.9259

A small p-value (e.g., less than 0.05 suggests that the variances are not homogeneous and that the ANOVA may not be appropriate.

### **Mann-Whitney/Wilcoxon Two-Sample Test (Kruskal-Wallis test for two groups)**

Kruskal-Wallis H (equivalent to Chi square) = 2.5580

Degrees of freedom = 1

P value = 0.1097

### **TABLES HTLVHUPE IDADE\_cod**

[Next Procedure](#)

[Forward](#)

---

| IDADE_COD |   |   |       |
|-----------|---|---|-------|
| HTLVHUPE  | 1 | 2 | TOTAL |

|              |       |       |       |
|--------------|-------|-------|-------|
| <b>Yes</b>   | 2     | 6     | 8     |
| Row %        | 25,0  | 75,0  | 100,0 |
| Col %        | 0,3   | 1,1   | 0,7   |
| <b>No</b>    | 646   | 546   | 1192  |
| Row %        | 54,2  | 45,8  | 100,0 |
| Col %        | 99,7  | 98,9  | 99,3  |
| <b>TOTAL</b> | 648   | 552   | 1200  |
| Row %        | 54,0  | 46,0  | 100,0 |
| Col %        | 100,0 | 100,0 | 100,0 |

### Single Table Analysis

|                            | Point Estimate | 95% Confidence Interval |            |
|----------------------------|----------------|-------------------------|------------|
|                            |                | Lower                   | Upper      |
| PARAMETERS: Odds-based     |                |                         |            |
| Odds Ratio (cross product) | 0,2817         | 0,0566                  | 1,4016 (T) |
| Odds Ratio (MLE)           | 0,2820         | 0,0390                  | 1,3384 (M) |
|                            |                | 0,0277                  | 1,5853 (F) |
| PARAMETERS: Risk-based     |                |                         |            |
| Risk Ratio (RR)            | 0,4613         | 0,1387                  | 1,5337 (T) |
| Risk Difference (RD%)      | -29,1946       | -59,3339                | 0,9446 (T) |

(T=Taylor series; C=Cornfield; M=Mid-P; F=Fisher Exact)

STATISTICAL TESTS      Chi-square 1-tailed p      2-tailed p

|                                |        |              |
|--------------------------------|--------|--------------|
| Chi-square - uncorrected       | 2,7267 | 0,0986832673 |
| Chi-square - Mantel-Haenszel   | 2,7244 | 0,0988238032 |
| Chi-square - corrected (Yates) | 1,6781 | 0,1951840404 |
| Mid-p exact                    |        | 0,0589692892 |
| Fisher exact                   |        | 0,0974378258 |

Warning: The expected value of a cell is <5. Fisher Exact Test should be used.

[PreviousDataset Results Library](#)

### MEANS IDADEINICIOSEXO

[Next Procedure](#)

[Forward](#)

| IDADE (EM ANOS) DE INÍCIO DA ATIVIDADE SEXUAL | Frequency | Percent | Cum Percent |  |
|-----------------------------------------------|-----------|---------|-------------|--|
| 7                                             | 1         | 0.1%    | 0.1%        |  |
| 8                                             | 1         | 0.1%    | 0.2%        |  |
| 9                                             | 1         | 0.1%    | 0.2%        |  |
| 10                                            | 2         | 0.2%    | 0.4%        |  |
| 11                                            | 5         | 0.4%    | 0.8%        |  |
| 12                                            | 31        | 2.6%    | 3.4%        |  |
| 13                                            | 92        | 7.6%    | 11.0%       |  |

|              |      |        |        |                                                                                       |
|--------------|------|--------|--------|---------------------------------------------------------------------------------------|
| 14           | 187  | 15.5%  | 26.6%  |    |
| 15           | 238  | 19.8%  | 46.3%  |    |
| 16           | 199  | 16.5%  | 62.9%  |    |
| 17           | 155  | 12.9%  | 75.7%  |    |
| 18           | 131  | 10.9%  | 86.6%  |    |
| 19           | 56   | 4.7%   | 91.3%  |    |
| 20           | 28   | 2.3%   | 93.6%  |    |
| 21           | 25   | 2.1%   | 95.7%  |    |
| 22           | 12   | 1.0%   | 96.7%  |    |
| 23           | 11   | 0.9%   | 97.6%  |    |
| 24           | 6    | 0.5%   | 98.1%  |    |
| 25           | 10   | 0.8%   | 98.9%  |    |
| 26           | 7    | 0.6%   | 99.5%  |    |
| 27           | 3    | 0.2%   | 99.8%  |    |
| 32           | 2    | 0.2%   | 99.9%  |    |
| 33           | 1    | 0.1%   | 100.0% |    |
| <b>Total</b> | 1204 | 100.0% | 100.0% |  |

Obs    Total    Mean    Variance    StdDev  
 1204 19452.0000 16.1561    7.4453    2.7286  
 Minimum    25%    Median    75%    Maximum    Mode  
 7.0000 14.0000 16.0000 17.0000    33.0000 15.0000

[PreviousDataset Results Library](#)

## MEANS IDADEINICIOSEXO HTLVHUPE

[Next Procedure](#)

[Forward](#)

| HTLV                                          |     |       |       |
|-----------------------------------------------|-----|-------|-------|
| IDADE (EM ANOS) DE INÍCIO DA ATIVIDADE SEXUAL | Yes | No    | TOTAL |
| <b>7</b>                                      | 0   | 1     | 1     |
| Row %                                         | 0.0 | 100.0 | 100.0 |
| Col %                                         | 0.0 | 0.1   | 0.1   |
| <b>8</b>                                      | 0   | 1     | 1     |
| Row %                                         | 0.0 | 100.0 | 100.0 |
| Col %                                         | 0.0 | 0.1   | 0.1   |
| <b>9</b>                                      | 0   | 1     | 1     |
| Row %                                         | 0.0 | 100.0 | 100.0 |
| Col %                                         | 0.0 | 0.1   | 0.1   |
| <b>10</b>                                     | 0   | 2     | 2     |
| Row %                                         | 0.0 | 100.0 | 100.0 |
| Col %                                         | 0.0 | 0.2   | 0.2   |
| <b>11</b>                                     | 0   | 5     | 5     |
| Row %                                         | 0.0 | 100.0 | 100.0 |
| Col %                                         | 0.0 | 0.4   | 0.4   |
| <b>12</b>                                     | 0   | 31    | 31    |
| Row %                                         | 0.0 | 100.0 | 100.0 |
| Col %                                         | 0.0 | 2.6   | 2.6   |
| <b>13</b>                                     | 1   | 91    | 92    |

|  |           |      |       |       |
|--|-----------|------|-------|-------|
|  | Row %     | 1.1  | 98.9  | 100.0 |
|  | Col %     | 12.5 | 7.6   | 7.6   |
|  | <b>14</b> | 1    | 186   | 187   |
|  | Row %     | 0.5  | 99.5  | 100.0 |
|  | Col %     | 12.5 | 15.6  | 15.5  |
|  | <b>15</b> | 1    | 237   | 238   |
|  | Row %     | 0.4  | 99.6  | 100.0 |
|  | Col %     | 12.5 | 19.8  | 19.8  |
|  | <b>16</b> | 3    | 196   | 199   |
|  | Row %     | 1.5  | 98.5  | 100.0 |
|  | Col %     | 37.5 | 16.4  | 16.5  |
|  | <b>17</b> | 0    | 155   | 155   |
|  | Row %     | 0.0  | 100.0 | 100.0 |
|  | Col %     | 0.0  | 13.0  | 12.9  |
|  | <b>18</b> | 1    | 130   | 131   |
|  | Row %     | 0.8  | 99.2  | 100.0 |
|  | Col %     | 12.5 | 10.9  | 10.9  |
|  | <b>19</b> | 1    | 55    | 56    |
|  | Row %     | 1.8  | 98.2  | 100.0 |
|  | Col %     | 12.5 | 4.6   | 4.7   |
|  | <b>20</b> | 0    | 28    | 28    |
|  | Row %     | 0.0  | 100.0 | 100.0 |
|  | Col %     | 0.0  | 2.3   | 2.3   |
|  | <b>21</b> | 0    | 25    | 25    |
|  | Row %     | 0.0  | 100.0 | 100.0 |
|  | Col %     | 0.0  | 2.1   | 2.1   |
|  | <b>22</b> | 0    | 12    | 12    |



|  |              |       |       |       |
|--|--------------|-------|-------|-------|
|  | Row %        | 0.0   | 100.0 | 100.0 |
|  | Col %        | 0.0   | 1.0   | 1.0   |
|  | <b>23</b>    | 0     | 11    | 11    |
|  | Row %        | 0.0   | 100.0 | 100.0 |
|  | Col %        | 0.0   | 0.9   | 0.9   |
|  | <b>24</b>    | 0     | 6     | 6     |
|  | Row %        | 0.0   | 100.0 | 100.0 |
|  | Col %        | 0.0   | 0.5   | 0.5   |
|  | <b>25</b>    | 0     | 10    | 10    |
|  | Row %        | 0.0   | 100.0 | 100.0 |
|  | Col %        | 0.0   | 0.8   | 0.8   |
|  | <b>26</b>    | 0     | 7     | 7     |
|  | Row %        | 0.0   | 100.0 | 100.0 |
|  | Col %        | 0.0   | 0.6   | 0.6   |
|  | <b>27</b>    | 0     | 3     | 3     |
|  | Row %        | 0.0   | 100.0 | 100.0 |
|  | Col %        | 0.0   | 0.3   | 0.2   |
|  | <b>32</b>    | 0     | 2     | 2     |
|  | Row %        | 0.0   | 100.0 | 100.0 |
|  | Col %        | 0.0   | 0.2   | 0.2   |
|  | <b>33</b>    | 0     | 1     | 1     |
|  | Row %        | 0.0   | 100.0 | 100.0 |
|  | Col %        | 0.0   | 0.1   | 0.1   |
|  | <b>TOTAL</b> | 8     | 1196  | 1204  |
|  | Row %        | 0.7   | 99.3  | 100.0 |
|  | Col %        | 100.0 | 100.0 | 100.0 |

### Descriptive Statistics for Each Value of Crosstab Variable

|     | Obs     | Total      | Mean    | Variance | StdDev  |         |  |
|-----|---------|------------|---------|----------|---------|---------|--|
| Yes | 8       | 127.0000   | 15.8750 | 3.8393   | 1.9594  |         |  |
| No  | 1196    | 19325.0000 | 16.1580 | 7.4721   | 2.7335  |         |  |
|     | Minimum | 25%        | Median  | 75%      | Maximum | Mode    |  |
| Yes | 13.0000 | 14.5000    | 16.0000 | 17.0000  | 19.0000 | 16.0000 |  |
| No  | 7.0000  | 14.0000    | 16.0000 | 17.0000  | 33.0000 | 15.0000 |  |

### ANOVA, a Parametric Test for Inequality of Population Means

(For normally distributed data only)

| Variation | SS        | df   | MS     | F statistic |
|-----------|-----------|------|--------|-------------|
| Between   | 0.6366    | 1    | 0.6366 | 0.0854      |
| Within    | 8956.0079 | 1202 | 7.4509 |             |
| Total     | 8956.6445 | 1203 |        |             |

T Statistic = 0.2923

P-value = 0.7701

### Bartlett's Test for Inequality of Population Variances

Bartlett's chi square= 1.1961 df=1 P value=0.2741

A small p-value (e.g., less than 0.05 suggests that the variances are not homogeneous and that the ANOVA may not be appropriate.

**Mann-Whitney/Wilcoxon Two-Sample Test (Kruskal-Wallis test for two groups)**

Kruskal-Wallis H (equivalent to Chi square) = .0019

Degrees of freedom = 1

P value = 0.9651

[Previous Dataset Results Library](#)

**FREQ HIVSifilis**

[Next Procedure](#)

[Forward](#)

| HIVSifilis   | Frequency | Percent | Cum Percent |  |
|--------------|-----------|---------|-------------|--|
| 0            | 1138      | 94.5%   | 94.5%       |  |
| 1            | 62        | 5.1%    | 99.7%       |  |
| 2            | 4         | 0.3%    | 100.0%      |  |
| <b>Total</b> | 1204      | 100.0%  | 100.0%      |  |

**95% ConfLimits**

0 93.0% 95.7%

1 4.0% 6.6%

2 0.1% 0.9%

[PreviousDataset Results Library](#)

### TABLES SEXARCA HTLVHUPE

[Next Procedure](#)

[Forward](#)

| HTLV         |       |       |       |
|--------------|-------|-------|-------|
| SEXARCA      | Yes   | No    | TOTAL |
| <b>1</b>     | 3     | 555   | 558   |
| Row %        | 0.5   | 99.5  | 100.0 |
| Col %        | 37.5  | 46.4  | 46.3  |
| <b>2</b>     | 5     | 641   | 646   |
| Row %        | 0.8   | 99.2  | 100.0 |
| Col %        | 62.5  | 53.6  | 53.7  |
| <b>TOTAL</b> | 8     | 1196  | 1204  |
| Row %        | 0.7   | 99.3  | 100.0 |
| Col %        | 100.0 | 100.0 | 100.0 |

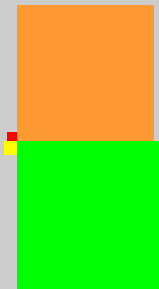

### Single TableAnalysis

| Point    | 95% ConfidenceInterval |       |
|----------|------------------------|-------|
| Estimate | Lower                  | Upper |

PARAMETERS: Odds-based

|                          |         |         |            |
|--------------------------|---------|---------|------------|
| OddsRatio (crossproduct) | 0.6930  | 0.1649  | 2.9128 (T) |
| OddsRatio (MLE)          | 0.6932  | 0.1359  | 3.0142 (M) |
|                          |         | 0.1072  | 3.5811 (F) |
| PARAMETERS: Risk-based   |         |         |            |
| RiskRatio (RR)           | 0.6946  | 0.1667  | 2.8936 (T) |
| RiskDifference (RD%)     | -0.2364 | -1.1446 | 0.6719 (T) |

(T=Taylor series; C=Cornfield; M=Mid-P; F=Fisher Exact)

| STATISTICAL TESTS              | Chi-square 1-tailed p | 2-tailed p   |
|--------------------------------|-----------------------|--------------|
| Chi-square - uncorrected       | 0.2534                | 0.6146870377 |
| Chi-square - Mantel-Haenszel   | 0.2532                | 0.6148340246 |
| Chi-square - corrected (Yates) | 0.0218                | 0.8825719344 |
| Mid-p exact                    | 0.3212220159          |              |
| Fisher exact                   | 0.4454602675          |              |

Warning: The expected value of a cell is <5. Fisher Exact Test should be used.

[Previous Dataset Results Library](#)

**TABLES USOPRESERVANTESGRAV HTLVHUPE**

[Next Procedure](#)

[Forward](#)

| HTLV                                  |       |       |       |
|---------------------------------------|-------|-------|-------|
| USO DE PRESERVATIVO ANTES DA GRAVIDEZ | Yes   | No    | TOTAL |
| <b>1</b>                              | 3     | 718   | 721   |
| Row %                                 | 0.4   | 99.6  | 100.0 |
| Col %                                 | 37.5  | 60.1  | 59.9  |
| <b>2</b>                              | 5     | 477   | 482   |
| Row %                                 | 1.0   | 99.0  | 100.0 |
| Col %                                 | 62.5  | 39.9  | 40.1  |
| <b>TOTAL</b>                          | 8     | 1195  | 1203  |
| Row %                                 | 0.7   | 99.3  | 100.0 |
| Col %                                 | 100.0 | 100.0 | 100.0 |

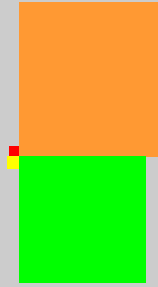

### Single Table Analysis

|                          | Point    | 95% Confidence Interval |            |
|--------------------------|----------|-------------------------|------------|
|                          | Estimate | Lower                   | Upper      |
| PARAMETERS: Odds-based   |          |                         |            |
| OddsRatio (crossproduct) | 0.3986   | 0.0948                  | 1.6758 (T) |
| OddsRatio (MLE)          | 0.3989   | 0.0782                  | 1.7349 (M) |
|                          |          | 0.0617                  | 2.0613 (F) |
| PARAMETERS: Risk-based   |          |                         |            |
| RiskRatio (RR)           | 0.4011   | 0.0963                  | 1.6706 (T) |
| RiskDifference (RD%)     | -0.6213  | -1.6406                 | 0.3980 (T) |

(T=Taylor series; C=Cornfield; M=Mid-P; F=Fisher Exact)

| STATISTICAL TESTS              | Chi-square 1-tailed p | 2-tailed p   |
|--------------------------------|-----------------------|--------------|
| Chi-square - uncorrected       | 1.6878                | 0.1938871786 |
| Chi-square - Mantel-Haenszel   | 1.6864                | 0.1940725500 |
| Chi-square - corrected (Yates) | 0.8784                | 0.3486470273 |
| Mid-p exact                    | 0.1117892291          |              |
| <b>Fisher exact</b>            | <b>0.1739270137</b>   |              |

Warning: The expected value of a cell is <5. Fisher Exact Test should be used.

[Previous Dataset Results Library](#)

## TABLES NUMPARCSEXVIDA1 HTLVHUPE

[Next Procedure](#)

[Forward](#)

| HTLV                           |      |      |       |
|--------------------------------|------|------|-------|
| NÚM DE PARCEIROS ATÉ O MOMENTO | Yes  | No   | TOTAL |
| 1                              | 4    | 789  | 793   |
| Row %                          | 0.5  | 99.5 | 100.0 |
| Col %                          | 50.0 | 69.6 | 69.4  |

|  |              |       |       |       |
|--|--------------|-------|-------|-------|
|  | <b>2</b>     | 4     | 345   | 349   |
|  | Row %        | 1.1   | 98.9  | 100.0 |
|  | Col %        | 50.0  | 30.4  | 30.6  |
|  | <b>TOTAL</b> | 8     | 1134  | 1142  |
|  | Row %        | 0.7   | 99.3  | 100.0 |
|  | Col %        | 100.0 | 100.0 | 100.0 |

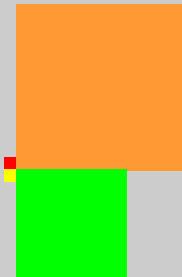

### Single Table Analysis

|                          | Point Estimate | 95% Confidence Interval |            |
|--------------------------|----------------|-------------------------|------------|
|                          |                | Lower                   | Upper      |
| PARAMETERS: Odds-based   |                |                         |            |
| OddsRatio (crossproduct) | 0.4373         | 0.1087                  | 1.7585 (T) |
| OddsRatio (MLE)          | 0.4376         | 0.0982                  | 1.9503 (M) |
|                          |                | 0.0810                  | 2.3637 (F) |
| PARAMETERS: Risk-based   |                |                         |            |
| RiskRatio (RR)           | 0.4401         | 0.1107                  | 1.7497 (T) |
| RiskDifference (RD%)     | -0.6417        | -1.8625                 | 0.5790 (T) |

(T=Taylor series; C=Cornfield; M=Mid-P; F=Fisher Exact)

| STATISTICAL TESTS            | Chi-square 1-tailed p | 2-tailed p   |
|------------------------------|-----------------------|--------------|
| Chi-square – uncorrected     | 1.4347                | 0.2310055846 |
| Chi-square - Mantel-Haenszel | 1.4334                | 0.2312099074 |



Chi-square - corrected (Yates) 0.6604 0.4164025563  
 Mid-p exact 0.1327324923  
 Fisher exact 0.2036940253

Warning: The expected value of a cell is <5. Fisher Exact Test should be used.

[Previous Dataset Results Library](#)

**TABLES ESCOLARIDADE HTLVHUPE**

[Next Procedure](#)

[Forward](#)

| <b>HTLV</b>         |            |           |              |
|---------------------|------------|-----------|--------------|
| <b>ESCOLARIDADE</b> | <b>Yes</b> | <b>No</b> | <b>TOTAL</b> |
| <b>1</b>            | 3          | 425       | 428          |
| Row %               | 0.7        | 99.3      | 100.0        |
| Col %               | 37.5       | 35.7      | 35.7         |
| <b>2</b>            | 5          | 767       | 772          |
| Row %               | 0.6        | 99.4      | 100.0        |
| Col %               | 62.5       | 64.3      | 64.3         |
| <b>TOTAL</b>        | 8          | 1192      | 1200         |
| Row %               | 0.7        | 99.3      | 100.0        |
| Col %               | 100.0      | 100.0     | 100.0        |

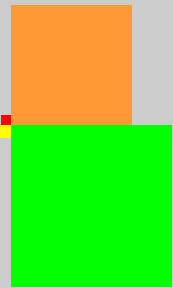

### Single Table Analysis

|                          | Point    | 95% Confidence Interval |            |
|--------------------------|----------|-------------------------|------------|
|                          | Estimate | Lower                   | Upper      |
| PARAMETERS: Odds-based   |          |                         |            |
| OddsRatio (crossproduct) | 1.0828   | 0.2575                  | 4.5533 (T) |
| OddsRatio (MLE)          | 1.0828   | 0.2122                  | 4.7100 (M) |
|                          |          | 0.1673                  | 5.5961 (F) |
| PARAMETERS: Risk-based   |          |                         |            |
| RiskRatio (RR)           | 1.0822   | 0.2599                  | 4.5066 (T) |
| RiskDifference (RD%)     | 0.0533   | -0.9188                 | 1.0253 (T) |

(T=Taylor series; C=Cornfield; M=Mid-P; F=Fisher Exact)

| STATISTICAL TESTS              | Chi-square | 1-tailed p   | 2-tailed p   |
|--------------------------------|------------|--------------|--------------|
| Chi-square – uncorrected       | 0.0118     |              | 0.9135079980 |
| Chi-square - Mantel-Haenszel   | 0.0118     |              | 0.9135439024 |
| Chi-square - corrected (Yates) | 0.0685     |              | 0.7935812742 |
| Mid-p exact                    |            | 0.4480137338 |              |
| Fisher exact                   |            | 0.5884870985 |              |

Warning: The expected value of a cell is <5. Fisher Exact Test should be used.

[Previous Dataset Results Library](#)

**TABLES ESTADOCONJUGAL HTLVHUPE**

[Next Procedure](#)

[Forward](#)

| HTLV            |       |       |       |
|-----------------|-------|-------|-------|
| ESTADO CONJUGAL | Yes   | No    | TOTAL |
| <b>1</b>        | 5     | 883   | 888   |
| Row %           | 0.6   | 99.4  | 100.0 |
| Col %           | 62.5  | 73.9  | 73.8  |
| <b>2</b>        | 3     | 312   | 315   |
| Row %           | 1.0   | 99.0  | 100.0 |
| Col %           | 37.5  | 26.1  | 26.2  |
| <b>TOTAL</b>    | 8     | 1195  | 1203  |
| Row %           | 0.7   | 99.3  | 100.0 |
| Col %           | 100.0 | 100.0 | 100.0 |

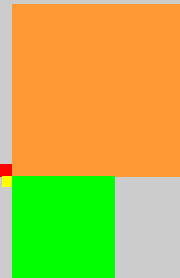

**Single Table Analysis**

|                          | Point Estimate | 95% Confidence Interval |            |
|--------------------------|----------------|-------------------------|------------|
|                          |                | Lower                   | Upper      |
| PARAMETERS: Odds-based   |                |                         |            |
| OddsRatio (crossproduct) | 0.5889         | 0.1399                  | 2.4786 (T) |

|                        |         |         |            |
|------------------------|---------|---------|------------|
| OddsRatio (MLE)        | 0.5892  | 0.1353  | 3.0094 (M) |
|                        |         | 0.1139  | 3.8159 (F) |
| PARAMETERS: Risk-based |         |         |            |
| RiskRatio (RR)         | 0.5912  | 0.1421  | 2.4597 (T) |
| RiskDifference (RD%)   | -0.3893 | -1.5694 | 0.7908 (T) |

(T=Taylor series; C=Cornfield; M=Mid-P; F=Fisher Exact)

| STATISTICAL TESTS              | Chi-square 1-tailed p | 2-tailed p   |
|--------------------------------|-----------------------|--------------|
| Chi-square – uncorrected       | 0.5335                | 0.4651368652 |
| Chi-square - Mantel-Haenszel   | 0.5331                | 0.4653224331 |
| Chi-square - corrected (Yates) | 0.1069                | 0.7436858526 |
| Mid-p exact                    | 0.2405651116          |              |
| Fisher exact                   | 0.3510016370          |              |

Warning: The expected value of a cell is <5. Fisher Exact Test should be used.

[Previous Dataset Results Library](#)

**TABLES Gest2 HTLVHUPE**

[Next Procedure](#)

---

[Forward](#)

| HTLV                                    |       |       |       |
|-----------------------------------------|-------|-------|-------|
| Quantas vezes (total) já ficou grávida? | Yes   | No    | TOTAL |
| <b>1</b>                                | 3     | 728   | 731   |
| Row %                                   | 0.4   | 99.6  | 100.0 |
| Col %                                   | 37.5  | 69.7  | 69.4  |
| <b>2</b>                                | 5     | 317   | 322   |
| Row %                                   | 1.6   | 98.4  | 100.0 |
| Col %                                   | 62.5  | 30.3  | 30.6  |
| <b>TOTAL</b>                            | 8     | 1045  | 1053  |
| Row %                                   | 0.8   | 99.2  | 100.0 |
| Col %                                   | 100.0 | 100.0 | 100.0 |

### Single Table Analysis

|                          | Point Estimate | 95% Confidence Interval |            |
|--------------------------|----------------|-------------------------|------------|
|                          |                | Lower                   | Upper      |
| PARAMETERS: Odds-based   |                |                         |            |
| OddsRatio (crossproduct) | 0.2613         | 0.0621                  | 1.0999 (T) |
| OddsRatio (MLE)          | 0.2616         | 0.0512                  | 1.1394 (M) |
|                          |                | 0.0404                  | 1.3540 (F) |
| PARAMETERS: Risk-based   |                |                         |            |
| RiskRatio (RR)           | 0.2643         | 0.0635                  | 1.0993 (T) |
| RiskDifference (RD%)     | -1.1424        | -2.5702                 | 0.2854 (T) |

(T=Taylor series; C=Cornfield; M=Mid-P; F=Fisher Exact)

| STATISTICAL TESTS              | Chi-square 1-tailed p | 2-tailed p   |
|--------------------------------|-----------------------|--------------|
| Chi-square - uncorrected       | 3.8693                | 0.0491786497 |
| Chi-square - Mantel-Haenszel   | 3.8656                | 0.0492864437 |
| Chi-square - corrected (Yates) | 2.5024                | 0.1136721796 |
| Mid-p exact                    | 0.0370367018          |              |
| Fisher exact                   | 0.0618682169          |              |

Warning: The expected value of a cell is <5. Fisher Exact Test should be used.

[Previous Dataset Results Library](#)

## TABLES ETNIA HTLVHUPE

[Next Procedure](#)

[Forward](#)

---

| HTLV        |      |      |       |
|-------------|------|------|-------|
| ETNIA / COR | Yes  | No   | TOTAL |
| 1           | 1    | 351  | 352   |
| Row %       | 0.3  | 99.7 | 100.0 |
| Col %       | 12.5 | 29.4 | 29.3  |

|              |       |       |       |
|--------------|-------|-------|-------|
| <b>2</b>     | 7     | 841   | 848   |
| Row %        | 0.8   | 99.2  | 100.0 |
| Col %        | 87.5  | 70.6  | 70.7  |
| <b>TOTAL</b> | 8     | 1192  | 1200  |
| Row %        | 0.7   | 99.3  | 100.0 |
| Col %        | 100.0 | 100.0 | 100.0 |

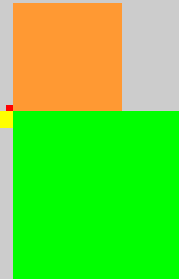

### Single Table Analysis

|                          | Point Estimate | 95% Confidence Interval |            |
|--------------------------|----------------|-------------------------|------------|
|                          |                | Lower                   | Upper      |
| PARAMETERS: Odds-based   |                |                         |            |
| OddsRatio (crossproduct) | 0.3423         | 0.0420                  | 2.7925 (T) |
| OddsRatio (MLE)          | 0.3425         | 0.0150                  | 2.2268 (M) |
|                          |                | 0.0076                  | 2.6820 (F) |
| PARAMETERS: Risk-based   |                |                         |            |
| RiskRatio (RR)           | 0.3442         | 0.0425                  | 2.7870 (T) |
| RiskDifference (RD%)     | -0.5414        | -1.3660                 | 0.2833 (T) |

(T=Taylor series; C=Cornfield; M=Mid-P; F=Fisher Exact)

| STATISTICAL TESTS            | Chi-square 1-tailed p | 2-tailed p   |
|------------------------------|-----------------------|--------------|
| Chi-square - uncorrected     | 1.1009                | 0.2940632052 |
| Chi-square - Mantel-Haenszel | 1.1000                | 0.2942644545 |

Chi-square - corrected (Yates)    0.4352                    0.5094611088  
 Mid-p exact                                    0.1646958476  
 Fisher exact                                    **0.2678046753**

Warning: The expected value of a cell is <5. Fisher Exact Test should be used.

[Previous Dataset Results Library](#)

**TABLES RENDAFAMMENS1 HTLVHUPE**

[Next Procedure](#)

[Forward](#)

| <b>HTLV</b>                                                 |            |           |              |  |
|-------------------------------------------------------------|------------|-----------|--------------|--|
| <b>RENDA FAMILIAR MENSAL ESTIMADA (EM SALÁRIOS MÍNIMOS)</b> | <b>Yes</b> | <b>No</b> | <b>TOTAL</b> |  |
| <b>1</b>                                                    | 7          | 992       | 999          |  |
| Row %                                                       | 0.7        | 99.3      | 100.0        |  |
| Col %                                                       | 87.5       | 83.6      | 83.6         |  |
| <b>2</b>                                                    | 1          | 195       | 196          |  |
| Row %                                                       | 0.5        | 99.5      | 100.0        |  |
| Col %                                                       | 12.5       | 16.4      | 16.4         |  |
| <b>TOTAL</b>                                                | 8          | 1187      | 1195         |  |
| Row %                                                       | 0.7        | 99.3      | 100.0        |  |
| Col %                                                       | 100.0      | 100.0     | 100.0        |  |

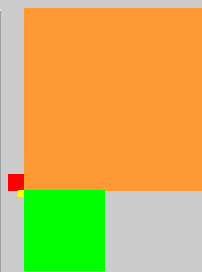



### Single Table Analysis

|                          | Point    | 95% Confidence Interval |             |
|--------------------------|----------|-------------------------|-------------|
|                          | Estimate | Lower                   | Upper       |
| PARAMETERS: Odds-based   |          |                         |             |
| OddsRatio (crossproduct) | 1.3760   | 0.1683                  | 11.2473 (T) |
| OddsRatio (MLE)          | 1.3757   | 0.2111                  | 31.3986 (M) |
|                          |          | 0.1751                  | 62.3292 (F) |
| PARAMETERS: Risk-based   |          |                         |             |
| RiskRatio (RR)           | 1.3734   | 0.1699                  | 11.1006 (T) |
| RiskDifference (RD%)     | 0.1905   | -0.9331                 | 1.3141 (T)  |

(T=Taylor series; C=Cornfield; M=Mid-P; F=Fisher Exact)

| STATISTICAL TESTS              | Chi-square | 1-tailed p   | 2-tailed p   |
|--------------------------------|------------|--------------|--------------|
| Chi-square - uncorrected       | 0.0894     |              | 0.7649190638 |
| Chi-square - Mantel-Haenszel   | 0.0893     |              | 0.7650145489 |
| Chi-square - corrected (Yates) | 0.0324     |              | 0.8571700900 |
| Mid-p exact                    |            | 0.4251148267 |              |
| Fisher exact                   |            | 0.6127781285 |              |

Warning: The expected value of a cell is <5. Fisher Exact Test should be used.

[Previous Dataset Results Library](#)

## TABLES HIVSifilis HTLVHUPE

[Next Procedure](#)

[Forward](#)

| HTLV         |       |       |       |
|--------------|-------|-------|-------|
| HIVSifilis   | Yes   | No    | TOTAL |
| <b>0</b>     | 7     | 1131  | 1138  |
| Row %        | 0.6   | 99.4  | 100.0 |
| Col %        | 87.5  | 94.6  | 94.5  |
| <b>1</b>     | 1     | 65    | 66    |
| Row %        | 1.5   | 98.5  | 100.0 |
| Col %        | 12.5  | 5.4   | 5.5   |
| <b>TOTAL</b> | 8     | 1196  | 1204  |
| Row %        | 0.7   | 99.3  | 100.0 |
| Col %        | 100.0 | 100.0 | 100.0 |

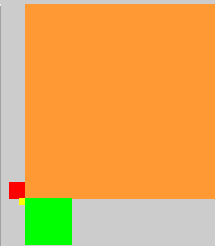

### Single Table Analysis

| PARAMETERS: Odds-based   | Point    | 95% ConfidenceInterval |            |
|--------------------------|----------|------------------------|------------|
|                          | Estimate | Lower                  | Upper      |
| OddsRatio (crossproduct) | 0.4023   | 0.0488                 | 3.3189 (T) |

|                        |         |         |             |
|------------------------|---------|---------|-------------|
| OddsRatio (MLE)        | 0.4028  | 0.0610  | 9.2696 (M)  |
|                        |         | 0.0505  | 18.4069 (F) |
| PARAMETERS: Risk-based |         |         |             |
| RiskRatio (RR)         | 0.4060  | 0.0507  | 3.2515 (T)  |
| RiskDifference (RD%)   | -0.9000 | -3.8820 | 2.0819 (T)  |

(T=Taylor series; C=Cornfield; M=Mid-P; F=Fisher Exact)

| STATISTICAL TESTS              | Chi-square 1-tailed p | 2-tailed p   |
|--------------------------------|-----------------------|--------------|
| Chi-square - uncorrected       | 0.7656                | 0.3815765974 |
| Chi-square - Mantel-Haenszel   | 0.7650                | 0.3817743839 |
| Chi-square - corrected (Yates) | 0.0092                | 0.9236925101 |
| Mid-p exact                    | 0.2153977818          |              |
| <b>Fisher exact</b>            | <b>0.3638816425</b>   |              |

Warning: The expected value of a cell is <5. Fisher Exact Test should be used.

[PreviousDataset Results Library](#)

**LOGISTIC HTLVHUPE = Gesta USOPRESERVANTESGRAV ESTADOCONJUGAL**

[Next Procedure](#)

### Unconditional Logistic Regression

| Term                | OddsRatio     | 95%           | C.I.           | Coefficient   | S. E.         | Z-Statistic   | P-Value       |
|---------------------|---------------|---------------|----------------|---------------|---------------|---------------|---------------|
| <b>Gesta</b>        | <b>3.6317</b> | <b>0.8522</b> | <b>15.4770</b> | <b>1.2897</b> | <b>0.7396</b> | <b>1.7437</b> | <b>0.0812</b> |
| USOPRESERVANTESGRAV | 2.4147        | 0.5643        | 10.3330        | 0.8816        | 0.7417        | 1.1886        | 0.2346        |
| ESTADOCONJUGAL      | 1.9803        | 0.4633        | 8.4649         | 0.6832        | 0.7412        | 0.9218        | 0.3566        |
| CONSTANT            | *             | *             | *              | -8.9838       | 2.0323        | -4.4205       | <u>0.0000</u> |

Convergence: Converged  
Iterations: 6  
Final -2\*Log-Likelihood: 88.3735  
Cases included: 1051

| Test            | Statistic | D.F. | P-Value |
|-----------------|-----------|------|---------|
| Score           | 6.0687    | 3    | 0.1083  |
| LikelihoodRatio | 5.6143    | 3    | 0.1320  |
