# Supplementary material for: Prevalence of HTLV-1/2 in Pregnant Women Living in the Metropolitan Area of Rio de Janeiro
Source: PLoS Negl Trop Dis. 2014 Sep 4;8(9):e3146. doi: 10.1371/journal.pntd.0003146 (PMC4154655; doi:10.1371/journal.pntd.0003146)
Supplement: Supporting Information S2 — Data file. (XLS) [file pntd.0003146.s002.xls]

## Sheet: Plan1
ID	Hospital	IDADE	IDADE_COD	ETNIA	NATURALIDADE	RENDAFAMMENS	RENDAFAMMENS1	ESCOLARIDADE	ESTADOCONJUGAL	Gesta	Gesta_cod	Para	Aborto	Numabortos	IDADEINICIOSEXO	SEXARCA	NUMPARCSEXVIDA	NUMPARCSEXVIDA1	USOPRESERVANTESGRAV	USOPRESERVANTESGRAV1	USODROGAS	INJECTDROG	HTLVHUPE	HIVHUPE	SIFILISHUPE	HIVSifilis
1	HUPE	31	2	1	RJ	3	2	2	1	2		2	0		15	1	1	2	3	1	0	FALSE	FALSE	FALSE	FALSE	0
2	HUPE	19	1	2	MINAS GERAIS	2	1	1	1	1		0	1	1	12	1	1	2	3	2	0	FALSE	FALSE	FALSE	TRUE	1
3	HUPE	30	2	2	RJ	4	2	2	1	1		0	1	1	23	2	1	1	3	2	0	FALSE	FALSE	FALSE	FALSE	0
4	HUPE	35	2	2	MINAS GERAIS	2	1	1	1	1		1	0		19	2	1	1	3	1	0	FALSE	FALSE	FALSE	FALSE	0
5	HUPE	37	2	2	RJ	2	1	2	1	1		1	0		25	2	1	2	3	1	0	FALSE	FALSE	FALSE	FALSE	0
6	HUPE	32	2	2	RJ	3	2	2	1	1		1	1		16	2	1	1	3	1	0	FALSE	FALSE	FALSE	FALSE	0
7	HUPE	29	2	2	RJ	2	1	2	1	1		0	0		27	2	1	1	3	2	0	FALSE	FALSE	FALSE	FALSE	0
8	HUPE	32	2	1	RJ	3	2	2	1	2		4	0		14	1	1	2	3	2	0	FALSE	FALSE	FALSE	TRUE	1
9	HUPE	21	1	1	RJ	1	1	2	1	2		3	1	1	15	1	1	1	3	2	0	FALSE	FALSE	FALSE	FALSE	0
10	HUPE	39	2	2	SERGIPE	6	2	2	1	2		0	1	3	22	2	1	1	3	2	0	FALSE	FALSE	FALSE	FALSE	0
11	HUPE	23	1	2	RJ	3	2	2	1	2		2	0		17	2	1	1	3	1	0	FALSE	FALSE	FALSE	FALSE	0
12	HUPE	32	2	2	CEARA	1	1	1	1	2		3	0		16	2	1	1	3	2	0	FALSE	FALSE	FALSE	FALSE	0
13	HUPE	35	2	2	RJ	3	2	2	1	1		1	0		17	2	1	1	3	2	0	FALSE	FALSE	FALSE	FALSE	0
14	HUPE	42	2	1	PERNAMBUCO	2	1	2	1	2		3	1	1	15	1	1	1	3	1	0	FALSE	FALSE	FALSE	FALSE	0
15	HUPE	33	2	1	RJ	6	2	2	2	1		0	0		15	1	1	2	3	1	0	FALSE	FALSE	FALSE	FALSE	0
16	HUPE	30	2	2	RJ	1	1	1	2	2		3	1	1	16	2	1	1	3	1	0	FALSE	FALSE	FALSE	FALSE	0
17	HUPE	35	2	1	RJ	2	1	2	2	2		1	1	7	21	2	1	2	3	2	0	FALSE	FALSE	FALSE	FALSE	0
18	HUPE	20	1	2	RJ	3	2	2	2	1		0	0		18	2	1	1	3	2	0	FALSE	FALSE	FALSE	FALSE	0
19	HUPE	32	2	2	RJ	1	1	1	1	2		4	0		15	1	1	1	3	2	0	FALSE	FALSE	FALSE	FALSE	0
20	HUPE	30	2	2	RJ	3	2	2	1	2		2			16	2	1	1	3	1	0	FALSE	FALSE	FALSE	FALSE	0
21	HUPE	25	2	1	RJ	2	1	2	1	1		0	0		17	2	1	2	3	1	0	FALSE	FALSE	FALSE	FALSE	0
22	HUPE	34	2	1	RJ	2	1	2	1	1		0			19	2	1	1	3	2	0	FALSE	FALSE	FALSE	FALSE	0
23	HUPE	40	2	2	MARANHÃO	3	2	1	1	2		2			19	2	1	1	3	2	0	FALSE	FALSE	FALSE	FALSE	0
24	HUPE	17	1	2	RJ	2	1	2	1	1		0	0		14	1	1	1	2	1	0	FALSE	FALSE	FALSE	FALSE	0
25	HUPE	40	2	2	RJ	2	1	1	1	2		4	0		20	2	1	1	2	1	0	FALSE	FALSE	FALSE	FALSE	0
26	HUPE	28	2	2	RJ	1	1	2	1	2		1	1		23	2	1	1	3	2	0	FALSE	FALSE	FALSE	FALSE	0
27	HUPE	26	2	2	PERNAMBUCANO	1	1	1	1	2		3	1		18	2	1	2	1	1	0	FALSE	FALSE	FALSE	FALSE	0
28	HUPE	36	2	1	RJ	1	1	1	2	2		5	0		15	1	1	2	3	2	0	FALSE	FALSE	FALSE	FALSE	0
29	HUPE	21	1	2	RIO GRANDE DO SUL	3	2	2	1	1		1	0		15	1	1	1	1	1	0	FALSE	FALSE	FALSE	FALSE	0
30	HUPE	23	1	1	RJ	2	1	2	2	2		2	0		13	1	1	1	3	1	0	FALSE	FALSE	FALSE	FALSE	0
31	HUPE	18	1	1	RJ	4	2	2	2	1		0	0		15	1		1	2	1	0	FALSE	FALSE	FALSE	FALSE	0
32	HUPE	29	2	2	RJ	2	1	1	1	2		2	0		15	1	1	2	3	1	0	FALSE	FALSE	FALSE	TRUE	1
33	HUPE	27	2	2	RJ	2	1	2	2	1		0	0		22	2	1	1	3	2	0	FALSE	FALSE	FALSE	FALSE	0
34	HUPE	26	2	2	MINAS GERAIS	1	1	2	1	1		0	0		24	2	1	1	3	1	0	FALSE	FALSE	FALSE	FALSE	0
35	HUPE	25	2	1	RJ	4	2	2	1	1		0	0		18	2	1	1	3	1	0	FALSE	FALSE	FALSE	FALSE	0
36	HUPE	23	1	2	RJ	3	2		1	2		2	1		17	2	1	2	3	1	0	FALSE	FALSE	FALSE	FALSE	0
37	HUPE	34	2	2	RJ	2	1	2	1	2		2	0		16	2	1	2	3	1	0	FALSE	FALSE	FALSE	FALSE	0
38	HUPE	30	2	2	RJ	2	1	2	1	1		1	0		13	1	1	1	3	2	0	FALSE	FALSE	FALSE	FALSE	0
39	HUPE	23	1	2	RJ	1	1	1	1	2		0	1	3	15	1	1	2	3	2	0	FALSE	FALSE	FALSE	FALSE	0
40	HUPE	33	2	2	RJ	2	1	2	2						20	2	1	2	2	1	0	FALSE	FALSE	FALSE	FALSE	0
41	HUPE	27	2	1	RJ	1	1	1	2	1		1	0		13	1	1	1	3	1	0	FALSE	FALSE	FALSE	FALSE	0
42	HUPE	18	1	2	RJ	1	1	2	1	1		0	0		15	1	1	1	3	1	0	FALSE	FALSE	FALSE	FALSE	0
43	HUPE	20	1	1	RJ	1	1	2	1	1		0	0		14	1	1	1	3	1	0	FALSE	FALSE	FALSE	FALSE	0
44	HUPE	38	2	2	RJ	2	1	2	1	2		1	1	2	15	1	1	1	3	1	0	FALSE	FALSE	FALSE	FALSE	0
45	HUPE	21	1	2	RJ	0	1	2	2	1		0	0		15	1	1	1	3	2	0	FALSE	FALSE	FALSE	FALSE	0
46	HUPE	27	2	2	RJ	3	2	2	1						15	1	1	1	3	2	0	FALSE	FALSE	FALSE	FALSE	0
47	HUPE	29	2	2	MG	2	1	1	1	2		3	0		15	1	1	2	3	2	0	FALSE	FALSE	FALSE	FALSE	0
48	HUPE	18	1	2	RJ	1	1	2	1	1		0	0		18	2	1	1	2	1	0	FALSE	FALSE	FALSE	FALSE	0
49	HUPE	25	2	2	RJ	1	1	1	2	1		1	0		14	1	1	2	3	2	0	FALSE	FALSE	FALSE	TRUE	1
50	HUPE	30	2	1	CEARA	3	2	1	2	2		2	1	1	15	1	1	2	3	2	0	FALSE	FALSE	FALSE	TRUE	1
51	HUPE	23	1	1	RJ	3	2	2	1	1		0	1	1	16	2	1	1	3	1	0	FALSE	FALSE	TRUE	FALSE	1
52	HUPE	41	2	2	RJ	6	2	2	1	2		3	0		21	2	1	1	3	1	0	FALSE	FALSE	FALSE	FALSE	0
53	HUPE	19	1	1	RJ	2	1	2	1	1		0	0		17	2	1	1	3	1	0	FALSE	FALSE	FALSE	FALSE	0
54	HUPE	35	2	2	RJ	2	1	2	2	2		1	1	1	18	2	0	2	3	1	0	FALSE	FALSE	FALSE	FALSE	0
55	HUPE	28	2	2	RJ	1	1	1	1	2		2	1	1	14	1	1	2	3	2	0	FALSE	FALSE	FALSE	FALSE	0
56	HUPE	33	2	2	RJ	1	1	1	1	2		2	0		19	2	1	1	3	1	0	FALSE	FALSE	FALSE	FALSE	0
57	HUPE	18	1	2	RJ	2	1	1	2	1		0	0		15	1	1	2	3	1	0	FALSE	FALSE	FALSE	FALSE	0
58	HUPE	37	2	1	RJ	2	1	2	1	2		1	1	1	17	2	1	2	3	1	0	FALSE	FALSE	FALSE	FALSE	0
59	HUPE	29	2	2	RJ	2	1	2	1						14	1	1	2	2	1	0	FALSE	FALSE	FALSE	FALSE	0
60	HUPE	40	2	1	RJ	2	1	2	1	2		4	1	5	21	2	1	1	3	1	0	FALSE	FALSE	FALSE	FALSE	0
61	HUPE	35	2	1	RJ	1	1	2	1	2		2	1	1	16	2	1	1	3	2	0	FALSE	FALSE	FALSE	FALSE	0
62	HUPE	30	2	2	RJ	1	1	1	1	2		3	1	1	17	2	1	2	3	2	0	FALSE	FALSE	FALSE	FALSE	0
63	HUPE	25	2	1	RJ	6	2	2	1	1		0	0		16	2	1	2	1	2	0	FALSE	FALSE	FALSE	FALSE	0
64	HUPE	26	2	1	RJ	1	1	2	1	1		0	0		18	2	1	2	1	1	0	FALSE	FALSE	TRUE	FALSE	1
65	HUPE	26	2	1	PARAÍBA	2	1	2	2	1		0	0		15	1	1	1	3	1	0	FALSE	FALSE	FALSE	FALSE	0
66	HUPE	36	2	1	RJ	2	1	1	1	2		5	0		15	1	1	2	3	1	0	FALSE	FALSE	FALSE	FALSE	0
67	HUPE	33	2	1	RJ	5	2	2	1	1		1	0		16	2	1	1	3	1	0	FALSE	FALSE	FALSE	FALSE	0
68	HUPE	16	1	2	ANGRA DOS REIS	4	2	1	1	1		0	0		14	1	1	1	3	1	0	FALSE	FALSE	FALSE	FALSE	0
69	HUPE	28	2	2	RJ	2	1	2	1	1		0	0		16	2	1	2	1	1	0	FALSE	FALSE	FALSE	FALSE	0
70	HUPE	16	1	2	RJ	1	1	2	2	1		0	0		15	1	1	1	1	2	0	FALSE	FALSE	FALSE	FALSE	0
71	HUPE	25	2	2	RJ	2	1	2	1	2		2	1	1	14	1	1	2	1	2	0	FALSE	FALSE	FALSE	TRUE	1
72	HUPE	32	2	2	RJ	2	1	1	1	1		1	0		15	1	1	1	3	2	0	FALSE	FALSE	FALSE	FALSE	0
73	HUPE	31	2	2	RJ	1	1	2	2	2		0	1	4	16	2	1	2	3	2	0	FALSE	FALSE	FALSE	FALSE	0
74	HUPE	38	2	1	RJ	3	2	2	1	2		2	0		17	2	1	1	3	2	0	FALSE	FALSE	FALSE	FALSE	0
75	HUPE	32	2	2	RJ	1	1	2	1	2		3	0		11	1	1	2	3	2	0	FALSE	FALSE	FALSE	FALSE	0
76	HUPE	36	2	2	CEARÁ	1	1	1	2	1		1	0		23	2	1	1	3	2	0	FALSE	FALSE	FALSE	FALSE	0
77	HUPE	31	2	2	RJ	1	1	1	1	2		2	1	1	18	2	1	2	2	2	0	FALSE	FALSE	FALSE	FALSE	0
78	HUPE	15	1	1	RJ	2	1	2	2	1		0	0		14	1	1	1	3	2	0	FALSE	FALSE	FALSE	FALSE	0
79	HUPE	31	2	1	RJ	6	2	2	1	1		1	0		18	2	1	1	3	1	0	FALSE	FALSE	FALSE	TRUE	1
80	HUPE	25	2	2	RJ	4	2	2	1	1		0	0		15	1	1	1	3	1	0	FALSE	FALSE	FALSE	FALSE	0
81	HUPE	35	2	2	RJ	1	1	1	1	2		5	1	1	11	1	1	1	3	2	0	FALSE	FALSE	FALSE	TRUE	1
82	HUPE	34	2	1	RJ	6	2	2	1	1		0	0		14	1	1	2	3	1	0	FALSE	FALSE	FALSE	FALSE	0
83	HUPE	21	1	1	RJ	3	2	2	1	1		0	0		15	1	1	1	3	2	0	FALSE	FALSE	FALSE	FALSE	0
84	HUPE	23	1	1	RJ	4	2	2	1	1		0	0		14	1	1	2	3	1	0	FALSE	FALSE	FALSE	FALSE	0
85	HUPE	26	2	1	RJ	2	1	1	1	1		1	0		15	1	1	1	3	2	0	FALSE	FALSE	FALSE	FALSE	0
86	HUPE	25	2	1	RJ	2	1	1	1	2		3	0		13	1	1		3	2	0	FALSE	FALSE	FALSE	FALSE	0
87	HUPE	34	2	1	RJ	2	1	1	2	1		0	0		17	2	1	2	3	2	0	FALSE	FALSE	FALSE	TRUE	1
88	HUPE	29	2	2	RJ	1	1	1	1	2		5	1	3	13	1	1	1	3	2	0	FALSE	FALSE	FALSE	FALSE	0
89	HUPE	35	2	2	RJ	1	1	1	2	2		8	0		14	1	1	2	3	1	0	FALSE	FALSE	FALSE	FALSE	0
90	HUPE	26	2	2	RJ	5	2	2	1	2		2	0		13	1	1	1	3	2	0	FALSE	TRUE	FALSE	TRUE	1
91	HUPE	19	1	2	RJ	1	1	2	1	1		2	0		12	1	1	1	1	1	0	FALSE	FALSE	FALSE	FALSE	0
92	HUPE	38	2	1	RJ	6	2	2	1	1		1	0		25	2	1	2	3	1	0	FALSE	FALSE	FALSE	FALSE	0
93	HUPE	24	1	2	PARAIBA	1	1	2	1	1		1	0		16	2	1	1	3	1	0	FALSE	FALSE	FALSE	FALSE	0
94	HUPE	39	2	2	PARAIBA	1	1	1	1	2		0	1	4	32	2	1	1	3	2	0	FALSE	FALSE	FALSE	FALSE	0
95	HUPE	25	2	2	RJ	4	2	2	2	1		0	0		13	1	1	1	3	1	0	FALSE	FALSE	FALSE	FALSE	0
96	HUPE	20	1	2	RJ	2	1	2	1	2		1	1	2	15	1	1	2	3	1	0	FALSE	FALSE	FALSE	FALSE	0
97	HUPE	15	1	2	RJ	0	1	1	1	1		0	0		16	2	1	1	3	1	0	FALSE	FALSE	FALSE	TRUE	1
98	HUPE	15	1	2	RJ	1	1	1	2	1		0	0		14	1	1	1	3	1	0	FALSE	FALSE	FALSE	FALSE	0
99	HUPE	34	2	1	RJ	1	1	2	1	2		0			27	2	1	2	3	1	0	FALSE	FALSE	TRUE	TRUE	1
100	HUPE	23	1	2	RJ	1	1	1	1	2		2	0		15	1	1	1	3	2	0	FALSE	FALSE	FALSE	FALSE	0
101	MESQUITA	23	1	2	RJ	2	1	2	1	2		2	0		14	1	1	1	3	2	0	FALSE	FALSE	FALSE	FALSE	0
102	MESQUITA	35	2	2	CEARA	1	1	1	1	2		3	1	1	16	2	1	1	3	1	0	FALSE	FALSE	FALSE	FALSE	0
103	MESQUITA	23	1	1	RJ	1	1	2	2	1		1	0		16	2	1	1	3	2	0	FALSE	FALSE	FALSE	FALSE	0
104	MESQUITA	20	1	2	RJ	1	1	2	1	1		1	0		16	2	1	1	3	1	0	FALSE	FALSE	FALSE	FALSE	0
105	MESQUITA	19	1	2	RJ	3	2	1	1	1		1	0		13	1	1	2	3	2	0	FALSE	FALSE	FALSE	FALSE	0
106	MESQUITA	27	2	2	RJ	2	1	2	1	1		1	0		18	2	1	1	2	1	0	FALSE	FALSE	FALSE	FALSE	0
107	MESQUITA	20	1	1	RJ	1	1	2	1	1		1	0		13	1	1	1	3	2	0	FALSE	FALSE	FALSE	FALSE	0
108	MESQUITA	19	1	1	RJ	1	1	2	1	1		0	0		18	2	1	1	3	1	0	FALSE	FALSE	FALSE	FALSE	0
109	MESQUITA	17	1	1	RJ	1	1	1	2	1		0	1	1	14	1	1	1	3	2	0	FALSE	FALSE	FALSE	FALSE	0
110	MESQUITA	20	1	2	RJ	3	2	2	1	1		0	0		17	2	1	1	1	1	0	FALSE	FALSE	FALSE	FALSE	0
111	MESQUITA	22	1	2	RJ	2	1	2	2	1		0	0		17	2	1	2	3	1	0	FALSE	FALSE	FALSE	FALSE	0
112	MESQUITA	18	1	2	RJ	1	1	2	2	1		0	0		17	2	1	1	3	1	0	FALSE	FALSE	FALSE	FALSE	0
113	MESQUITA	23	1	2	RJ	1	1	2	2	1		1	0		13	1	1	2	2	1	0	FALSE	FALSE	FALSE	FALSE	0
114	MESQUITA	20	1	2	RJ	3	2	2	2	1		0	0		16	2	1	1	3	1	0	FALSE	FALSE	FALSE	FALSE	0
115	MESQUITA	26	2	2	RIO GRANDE DO SUL	2	1	2	1	1		0	0		18	2	1	1	3	2	0	FALSE	FALSE	FALSE	FALSE	0
116	MESQUITA	25	2	2	RJ	1	1	2	1	1		1	0		15	1	1	1	3	2	0	FALSE	FALSE	FALSE	FALSE	0
117	MESQUITA	25	2	2	RJ	1	1	1	2	2		1	1	2	16	2	1	2	3	1	0	FALSE	FALSE	FALSE	FALSE	0
118	MESQUITA	20	1	2	PARA	2	1	2	1	1		0	0		13	1	1	2	3	1	0	FALSE	FALSE	FALSE	FALSE	0
119	MESQUITA	23	1	2	RJ	1	1	1	1	2		2	0		14	1	1	2	3	1	0	FALSE	FALSE	FALSE	FALSE	0
120	MESQUITA	26	2	2	PARANA	1	1	1	1	1		0	0		15	1	1	2	3	1	0	FALSE	FALSE	FALSE	FALSE	0
121	MESQUITA	30	2	1	RJ	1	1	1	1	2		3	0		15	1	1	1	3	1	0	FALSE	FALSE	FALSE	FALSE	0
122	MESQUITA	24	1	1	BAHIA	1	1	2	1	1		0	0		19	2	1	1	3	2	0	FALSE	FALSE	FALSE	FALSE	0
123	MESQUITA	27	2	1	RJ	1	1	2	1	1		1	0		18	2	1	1	3	1	0	FALSE	FALSE	FALSE	FALSE	0
124	MESQUITA	28	2	2	RJ	2	1	2	2	1		1	0		17	2	1	1	3	1	0	FALSE	FALSE	FALSE	FALSE	0
125	MESQUITA	18	1	2	RJ	1	1	2	2	1		0	0		16	2	1	2	3	1	0	FALSE	FALSE	FALSE	FALSE	0
126	MESQUITA	36	2	2	RJ	1	1	1	2	1		1	0		23	2	1	2	3	1	0	FALSE	FALSE	FALSE	FALSE	0
127	MESQUITA	32	2	2	PERNAMBUCO	1	1	2	1	2		2	0		19	2	1	2	3	2	0	FALSE	FALSE	FALSE	FALSE	0
128	MESQUITA	16	1	1	RJ	2	1	1	2	1		0	0		13	1	1	2	3	1	0	FALSE	FALSE	FALSE	FALSE	0
129	MESQUITA	30	2	2	RJ	2	1	1	1	1		1	0		18	2	1	2	2	2	0	FALSE	FALSE	FALSE	FALSE	0
130	MESQUITA	24	1	2	PERNAMBUCO	2	1	2	1	1		0	0		18	2	1	1	3	2	0	FALSE	FALSE	FALSE	FALSE	0
131	MESQUITA	24	1	2	RJ	1	1	2	1	1		0	0		22	2	1	1	3	2	0	FALSE	FALSE	FALSE	FALSE	0
132	MESQUITA	21	1	2	RJ	1	1	1	1	1		1	0		17	2	1	1	2	1	0	FALSE	FALSE	FALSE	FALSE	0
133	MESQUITA	37	2	1	RJ	6	2	2	2	2		2	0		16	2	1	1	3	1	0	FALSE	FALSE	FALSE	FALSE	0
134	MESQUITA	30	2	2	RJ	4	2	2	1	1		1	0		16	2	1	1	3	2	0	FALSE	FALSE	FALSE	FALSE	0
135	MESQUITA	29	2	2	RJ	3	2	2	1	2		1	1	1	21	2	1	2	3	1	0	FALSE	FALSE	FALSE	FALSE	0
136	MESQUITA	29	2	1	PARAIBA	1	1	1	1	1		1	0		22	2	1	1	3	1	0	FALSE	FALSE	FALSE	FALSE	0
137	MESQUITA	23	1	2	RJ	1	1	2	1	1		1	0		16	2	1	1	3	1	0	FALSE	FALSE	FALSE	FALSE	0
138	MESQUITA	17	1	2	RJ	1	1	2	1	1		0	0		16	2	1	1	3	1	0	FALSE	FALSE	FALSE	FALSE	0
139	MESQUITA	15	1	1	RJ	1	1	1	1						14	1	1	1	3	1	0	FALSE	FALSE	FALSE	TRUE	1
140	MESQUITA	19	1	2	RJ	1	1	1	1	1		1	0		15	1	1	1	3	1	0	FALSE	FALSE	FALSE	FALSE	0
141	MESQUITA	19	1	1	RJ	1	1	1	1	1		1	0		14	1	1	2	3	1	0	FALSE	FALSE	FALSE	FALSE	0
142	MESQUITA	25	2	1	RJ	1	1	1	1	1		1	0		17	2	1	2	3	2	0	FALSE	FALSE	FALSE	FALSE	0
143	MESQUITA	19	1	2	RJ	2	1	1	2	1		1	0		14	1	1	1	3	1	0	FALSE	FALSE	FALSE	FALSE	0
144	MESQUITA	19	1	2	RJ	1	1	1	1	1		1	0		15	1	1	1	3	1	0	FALSE	FALSE	FALSE	FALSE	0
145	MESQUITA	19	1	1	RONDONIA	1	1	1	1	1		0	0		14	1	1	1	3	1	0	FALSE	FALSE	FALSE	FALSE	0
146	MESQUITA	22	1	2	RJ	1	1	1	2	1		0	1	1	16	2	1	2	3	1	0	FALSE	FALSE	FALSE	FALSE	0
147	MESQUITA	19	1	2	RJ	1	1	1	1	1		0	0		16	2	1	1	1	1	0	FALSE	FALSE	FALSE	FALSE	0
148	MESQUITA	30	2	2	RJ	1	1	2	2	2		2	0		15	1	4	2	3	2	0	FALSE	FALSE	FALSE	FALSE	0
149	MESQUITA	18	1	2	RJ	3	2	2	1	1		1	0		15	1	1	1	3	1	0	FALSE	FALSE	FALSE	FALSE	0
150	MESQUITA	20	1	1	RJ	3	2	2	2	1		0	0		18	2	1	1	3	2	0	FALSE	FALSE	FALSE	FALSE	0
151	MESQUITA	26	2	1	RJ	2	1	1	1	2		4	0		14	1	1	1	3	2	0	FALSE	FALSE	FALSE	FALSE	0
152	MESQUITA	22	1	2	RJ	2	1	2	1	1		1	0		17	2	1	1	3	2	0	FALSE	FALSE	FALSE	FALSE	0
153	MESQUITA	16	1	2	RJ	1	1	1	1	1		0	0		13	1	1	1	3	1	0	FALSE	FALSE	FALSE	FALSE	0
154	MESQUITA	16	1	2	RJ	1	1	1	1	1		0	0		12	1	1	1	3	2	0	FALSE	FALSE	FALSE	FALSE	0
155	MESQUITA	24	1	2	RJ	1	1	2	1	2		1	1	1	14	1	1	2	3	1	0	FALSE	FALSE	FALSE	FALSE	0
156	MESQUITA	25	2	1	BAHIA	2	1	2	1						19	2	1	1	3	2	0	FALSE	FALSE	FALSE	FALSE	0
157	MESQUITA	17	1	2	RJ	3	2	1	1	1		0	0		11	1	1	1	3	1	0	FALSE	FALSE	FALSE	FALSE	0
158	MESQUITA	31	2	1	PARAIBA	2	1	1	1	2		2	1	1	15	1	1	1	3	1	0	FALSE	FALSE	FALSE	FALSE	0
159	MESQUITA	22	1	2	RJ	1	1	2	1	1		1	0		13	1	1	1	3	1	0	FALSE	FALSE	FALSE	FALSE	0
160	MESQUITA	25	2	1	FORTALEZA	3	2	2	1						18	2	1	1	3	1	0	FALSE	FALSE	FALSE	FALSE	0
161	MESQUITA	18	1	1	RJ	2	1	2	1	1		0	0		16	2	1	1	3	1	0	FALSE	FALSE	FALSE	FALSE	0
162	MESQUITA	25	2	2	RJ	3	2	2	1	1		0	0		15	1	1	1	3	1	0	FALSE	FALSE	FALSE	FALSE	0
163	MESQUITA	31	2	2	RJ	1	1	1		2		4	0		19	2	1	1	1	2	0	FALSE	FALSE	FALSE	FALSE	0
164	MESQUITA	19	1	2	RJ			2	1	1		0	0		14	1	1	2	3	1	0	FALSE	FALSE	FALSE	FALSE	0
165	MESQUITA	22	1	2	RJ	1	1	2	1						20	2	1	1	3	1	0	FALSE	FALSE	FALSE	FALSE	0
166	MESQUITA	23	1	2	RJ	1	1	2	1	1		1	0		19	2	1	1	3	1	0	FALSE	FALSE	FALSE	FALSE	0
167	MESQUITA	21	1	2	RJ	3	2	2	1	1		0	0		18	2	1	1	3	1	0	FALSE	FALSE	FALSE	FALSE	0
168	MESQUITA	22	1	2	RJ	1	1	2	1	1		0	0		19	2	1	1	3	1	0	FALSE	FALSE	FALSE	FALSE	0
169	MESQUITA	32	2	2	RJ	2	1	2	1						14	1	1	1	3	1	0	FALSE	FALSE	FALSE	FALSE	0
170	MESQUITA	24	1	1	RJ	3	2	2	1	2		1	1	1	17	2	1	1	3	1	0	FALSE	FALSE	FALSE	FALSE	0
171	MESQUITA	14	1	1	RJ	1	1	2	2	1		0	0		17	2	3	2	3	1	0	FALSE	FALSE	FALSE	TRUE	1
172	MESQUITA	17	1	2	RJ	1	1	1	2	1		0	0		16	2	1	1	3	1	0	FALSE	FALSE	FALSE	TRUE	1
173	MESQUITA	38	2	2	RJ	1	1	2	2	1		1	0		18	2		1	3	1	0	FALSE	FALSE	FALSE	FALSE	0
174	MESQUITA	24	1	2	RJ	2	1	1	1	2		2	0		15	1	1	2	3	1	0	FALSE	FALSE	FALSE	FALSE	0
175	MESQUITA	22	1	2	RJ	3	2	2	2	1		0	0		20	2	2	1	3	1	0	FALSE	FALSE	FALSE	FALSE	0
176	MESQUITA	21	1	2	RJ	1	1	1	1	1		0	0		17	2	1	2	3	1	0	FALSE	FALSE	FALSE	FALSE	0
177	MESQUITA	17	1	2	PERNAMBUCO	3	2	2	1	1		0	0		16	2	1	1	3	1	0	FALSE	FALSE	FALSE	FALSE	0
178	MESQUITA	17	1	1	RJ	1	1	2	2	1		0	0		14	1	1	1	3	2	0	FALSE	FALSE	FALSE	FALSE	0
179	MESQUITA	23	1	1	RJ	1	1	1	1	1		1	0		15	1	1	2	3	1	0	FALSE	FALSE	FALSE	FALSE	0
180	MESQUITA	22	1	2	RJ	3	2	2	1	1		0	0		20	2	1	1	3	2	0	FALSE	FALSE	FALSE	FALSE	0
181	MESQUITA	19	1	2	RJ	2	1	1	2	2		2	0		15	1	1	1	3	1	0	FALSE	FALSE	FALSE	FALSE	0
182	MESQUITA	27	2	2	RJ	1	1	2	1	2		3	1	1	13	1	1	2	3	1	0	FALSE	FALSE	FALSE	FALSE	0
183	MESQUITA	24	1	2	RJ	4	2	2	1	1		0	0		18	2	1	1	3	1	0	FALSE	FALSE	FALSE	FALSE	0
184	MESQUITA	25	2	2	PERNAMBUCO	2	1	2	1	1		1	0		15	1	1	1	3	1	0	FALSE	FALSE	FALSE	FALSE	0
185	MESQUITA	30	2	1	RJ	4	2	2	1	1		0	0		23	2	1	1	3	2	0	FALSE	FALSE	FALSE	FALSE	0
186	MESQUITA	25	2	2	RJ	1	1	2	1	1		1	0		20	2	1	1	3	1	0	FALSE	FALSE	FALSE	FALSE	0
187	MESQUITA	34	2	1	RJ	2	1	2	1	1		1	0		18	2	1	2	3	2	0	FALSE	FALSE	FALSE	FALSE	0
188	MESQUITA	18	1	2	RJ	1	1	1	2	1		0	1	1	14	1	1	1	3	1	0	FALSE	FALSE	FALSE	FALSE	0
189	MESQUITA	30	2	2	RJ	2	1	2	1	1		0	0		19	2	1	1	3	1	0	FALSE	FALSE	FALSE	FALSE	0
190	MESQUITA	30	2	2	RJ	1	1	2	2	2		1	1	1	17	2	1	1	3	1	0	FALSE	FALSE	FALSE	FALSE	0
191	MESQUITA	22	1	1	RJ	1	1	2	1	1		0	0		16	2	1	1	3	1	0	FALSE	FALSE	FALSE	FALSE	0
192	MESQUITA	22	1	2	RJ	6	2	2	1	1		1	0		15	1	1	1	3	1	0	FALSE	FALSE	FALSE	FALSE	0
193	MESQUITA	25	2	2	RJ	5	2	2	2	1		0	0		25	2	1	1	3	2	0	FALSE	FALSE	FALSE	FALSE	0
194	MESQUITA	21	1	2	RJ	1	1	1	2	1		0	0		17	2	3		3	1	0	FALSE	FALSE	FALSE	FALSE	0
195	MESQUITA	24	1	2	RJ	2	1	2	1	2		2	0		14	1	1	1	3	1	0	FALSE	FALSE	FALSE	TRUE	1
196	MESQUITA	40	2	2	RJ	1	1	1	1	2		3	0		15	1	1	2	3	1	0	FALSE	FALSE	FALSE	FALSE	0
197	MESQUITA	23	1	1	RJ	1	1	2	1	1		1	0		20	2	1	1	3	1	0	FALSE	FALSE	FALSE	FALSE	0
198	MESQUITA	20	1	2	RJ	2	1	2	1	1		0	0		14	1	1	2	3	1	0	FALSE	FALSE	FALSE	FALSE	0
199	MESQUITA	18	1	2	RJ	1	1	1	2	2		1	1	1	15	1	2	2	2	1	0	FALSE	FALSE	FALSE	FALSE	0
200	MESQUITA	21	1	2	RJ	1	1	2	1	1		0	0		17	2	1	1	3	1	0	FALSE	FALSE	FALSE	FALSE	0
201	MESQUITA	23	1	1	RJ	1	1	1	1	2		2	1	1	15	1	1	1	3	2	0	FALSE	FALSE	FALSE	FALSE	0
202	MESQUITA	25	2	2	RJ	1	1	2	1	2		1	1	1	18	2	2	2	3	2	0	FALSE	FALSE	FALSE	FALSE	0
203	MESQUITA	27	2	2	RJ	4	2	2	2	1		0	0		19	2	1	1	3	1	0	FALSE	FALSE	FALSE	FALSE	0
204	MESQUITA	19	1	2	RJ	1	1	1	1	1		0	1	0	14	1	1	1	3	1	0	FALSE	FALSE	FALSE	FALSE	0
205	MESQUITA	27	2	1	RJ	4	2	2	1	1		0	0		18	2	1	1	3	1	0	FALSE	FALSE	FALSE	FALSE	0
206	MESQUITA	24	1	1	RJ	6	2	2	1	1		1	0		13	1	1	2	3	1	0	FALSE	FALSE	FALSE	FALSE	0
207	MESQUITA	26	2	2	RJ	1	1	1	2	2		3	0		16	2	1	2	3	2	0	FALSE	FALSE	FALSE	FALSE	0
208	MESQUITA	17	1	2	RJ	1	1	1	1	1		0	0		15	1	1	1	3	2	0	FALSE	FALSE	FALSE	FALSE	0
209	MESQUITA	25	2	2	RJ	1	1	2	1	1		1	0		15	1	1	2	3	1	0	FALSE	FALSE	FALSE	FALSE	0
210	MESQUITA	25	2	2	MINAS GERAIS	1	1	1	2	2		2	1	1	16	2	1	1	3	1	0	FALSE	FALSE	FALSE	FALSE	0
211	MESQUITA	15	1	2	RJ	2	1	1	1	1		0	0		13	1	1	1	3	1	0	FALSE	FALSE	FALSE	FALSE	0
212	MESQUITA	31	2	2	RJ	2	1	2	1	1		1	0		15	1	1	1	3	2	0	FALSE	FALSE	FALSE	FALSE	0
213	MESQUITA	36	2	2	RJ	1	1	2	1	1		1	0		17	2	1	1	3	1	0	FALSE	FALSE	FALSE	FALSE	0
214	MESQUITA	25	2	2	RJ	1	1	1	1	2		4	0		15	1	1	1	3	1	0	FALSE	FALSE	FALSE	FALSE	0
215	MESQUITA	27	2	2	RJ	1	1	2	2	2		1	1	0	15	1	1	2	1	1	0	FALSE	FALSE	FALSE	TRUE	1
216	MESQUITA	22	1	2	BAHIA			2	1	1		1	0		14	1	1	1	1	1	0	FALSE	FALSE	FALSE	FALSE	0
217	MESQUITA	30	2	2	RJ	1	1	1	1	2		2	0		20	2	1	2	3	1	0	FALSE	FALSE	FALSE	FALSE	0
218	MESQUITA	22	1	2	RJ	2	1	2	2	1		1	0		15	1	1	2	3	1	0	FALSE	FALSE	FALSE	FALSE	0
219	MESQUITA	15	1	1	RJ	1	1	1	1	1		0	0		14	1	1	1	3	2	0	FALSE	FALSE	FALSE	FALSE	0
220	MESQUITA	17	1	2	RJ	1	1	1	1	1		1	0		12	1	1	2	3	2	0	FALSE	FALSE	FALSE	FALSE	0
221	MESQUITA	19	1	2	RJ	1	1	1	1	2		2	0		13	1	1	1	3	2	0	FALSE	FALSE	FALSE	FALSE	0
222	MESQUITA	25	2	2	RJ	1	1	2	1	2		2	0		18	2	1	1	3	2	0	FALSE	FALSE	FALSE	FALSE	0
223	MESQUITA	16	1	1	RJ	1	1	2	2	1		0	0		15	1	1	1	3	1	0	FALSE	FALSE	FALSE	FALSE	0
224	MESQUITA			2	RJ	1	1	1	1	1		0	0		8	1	1	1	3	1	0	FALSE	FALSE	FALSE	FALSE	0
225	MESQUITA			2	RJ	1	1	1	1	1		1	0		15	1	1	1	3	1	0	FALSE	FALSE	FALSE	FALSE	0
226	MESQUITA	29	2	2	RJ	1	1	2	2	2		3	0		15	1	1	1	3	2	0	FALSE	TRUE	FALSE	FALSE	0
227	MESQUITA	29	2	1	RJ	1	1	1	1	2		4	0		15	1	1	1	3	1	0	FALSE	FALSE	FALSE	FALSE	0
228	MESQUITA	22	1	2	RJ	1	1	2	1	2		2	0		14	1	1	1	3	2	0	FALSE	FALSE	FALSE	FALSE	0
229	MESQUITA	40	2	2	CEARA	1	1	1	1	2		5	0		17	2	1	2	3	2	0	FALSE	FALSE	FALSE	FALSE	0
230	MESQUITA	19	1	2	RJ	2	1	2	1	1		0	0		17	2	1	1	3	1	0	FALSE	FALSE	FALSE	FALSE	0
231	MESQUITA	18	1	2	RJ	3	2	2	2	1		0	0		17	2	1	1	3	1	0	FALSE	FALSE	FALSE	FALSE	0
232	MESQUITA	27	2	2	RJ	1	1	1	1	2		2	0		15	1	1	1	3	1	0	FALSE	FALSE	FALSE	FALSE	0
233	MESQUITA	19	1	2	RJ	1	1	1	1	2		1	1	1	14	1	1		3	1	0	FALSE	FALSE	FALSE	FALSE	0
234	MESQUITA	32	2	1	RJ	1	1	1	1	2		6	0		14	1	1	2	3	2	0	FALSE	FALSE	FALSE	FALSE	0
235	MESQUITA	17	1	1	RJ	1	1	2	1	1		0	0		15	1	1	1	3	2	0	FALSE	FALSE	FALSE	FALSE	0
236	MESQUITA	34	2	2	RJ	1	1	1	2	2		3	0		18	2	1	2	3	1	0	FALSE	FALSE	FALSE	FALSE	0
237	MESQUITA	20	1	2	RJ	2	1	2	1	1		0	0		17	2	1	2	3	2	0	FALSE	FALSE	FALSE	FALSE	0
238	MESQUITA	18	1	1	RJ	2	1	2	1	1		0	0		15	1	1	2	3	1	0	FALSE	FALSE	FALSE	FALSE	0
239	MESQUITA	22	1	1	RJ	1	1	2	1	1		0	0		15	1	1	1	3	1	0	FALSE	FALSE	FALSE	FALSE	0
240	MESQUITA	17	1	2	RJ	3	2	1	1	1		0	0		13	1	1	2	3	1	0	FALSE	FALSE	FALSE	FALSE	0
241	MESQUITA	23	1	1	RJ	1	1	1	1	1		1	0		18	2	1	1	3	2	0	FALSE	FALSE	FALSE	FALSE	0
242	MESQUITA	28	2	2	RJ	1	1	1	1	2		2	0		17	2	1	2	3	1	0	FALSE	FALSE	FALSE	FALSE	0
243	MESQUITA	30	2	2	BAHIA	2	1	1	1	2		1	1	1	18	2	1	1	3	1	0	FALSE	FALSE	FALSE	FALSE	0
244	MESQUITA	21	1	2	RJ	1	1	1	1	1		1	0		15	1	1	1	3	2	0	FALSE	FALSE	FALSE	FALSE	0
245	MESQUITA	23	1	2	RJ	1	1	2	2	1		1	0		15	1	2	1	3	1	0	FALSE	FALSE	FALSE	FALSE	0
246	MESQUITA	25	2	1	RJ	3	2	2	1	1		1	0		17	2	1	1	3	1	0	FALSE	FALSE	FALSE	FALSE	0
247	MESQUITA	16	1	2	RJ	1	1	1	1	1		0	0		14	1	1	1	3	1	0	FALSE	FALSE	FALSE	FALSE	0
248	MESQUITA	16	1	2	RJ	1	1	1	1	1		0	0		9	1	1	2	3	2	0	FALSE	FALSE	FALSE	FALSE	0
249	MESQUITA	37	2	1	RJ	4	2	2	1	2		2	1	1	20	2	1	1	3	1	0	FALSE	FALSE	FALSE	FALSE	0
250	MESQUITA	17	1	2	RJ	1	1	1	2	1		0	0		17	2	1	2	3	1	0	FALSE	FALSE	FALSE	FALSE	0
251	MESQUITA	25	2	2	MINAS GERAIS	2	1	2	1	1		1	0		19	2	1	1	3	1	0	FALSE	FALSE	FALSE	FALSE	0
252	MESQUITA	22	1	2	RJ	2	1	2	1	1		1	0		15	1	1	1	3	1	0	FALSE	FALSE	FALSE	FALSE	0
253	MESQUITA	19	1	1	RJ	1	1	1	2	1		1	0		12	1	1	2	3	1	0	FALSE	FALSE	FALSE	TRUE	1
254	MESQUITA	31	2	2	RJ	2	1	2	1	2		2	0		15	1	1	2	3	2	0	FALSE	FALSE	FALSE	FALSE	0
255	MESQUITA	21	1	2	RJ	5	2		1	1		1	0		14	1	1	1	1	1	0	FALSE	FALSE	FALSE	FALSE	0
256	MESQUITA	17	1	2	RJ	1	1	1	2	1		0	0		16	2	1	1	3	1	0	FALSE	FALSE	FALSE	FALSE	0
257	MESQUITA	20	1	1	RJ	2	1	2	1	1		0	0		18	2	1	1	3	2	0	FALSE	FALSE	FALSE	FALSE	0
258	MESQUITA	40	2	2	RJ	2	1	2	1	1		0	0		17	2	1	1	1	1	0	FALSE	FALSE	FALSE	FALSE	0
259	MESQUITA	20	1	2	RJ	1	1	2	1	1		0	1	0	15	1	1	2	3	1	0	FALSE	FALSE	FALSE	FALSE	0
260	MESQUITA	35	2	1	RJ	1	1	1	2	2		3	0		16	2	1	2	3	1	0	FALSE	FALSE	FALSE	FALSE	0
261	MESQUITA	21	1	2	RJ	1	1	2	1	1		1	0		13	1	1	1	3	1	0	FALSE	FALSE	FALSE	FALSE	0
262	MESQUITA	16	1	2	RJ	1	1	2	2	1		0	0		14	1	1	1	3	1	0	FALSE	FALSE	FALSE	FALSE	0
263	MESQUITA	24	1	2	RJ	1	1	2	1	2		2	0		12	1	1		3	2	0	FALSE	FALSE	FALSE	FALSE	0
264	MESQUITA	22	1	2	RJ	1	1	2	2	2		2	0		15	1	1	1	3	1	0	FALSE	FALSE	FALSE	FALSE	0
265	MESQUITA	27	2	2	RJ	2	1	2	1	1		0	0		17	2	1	2	3	1	0	FALSE	FALSE	FALSE	FALSE	0
266	MESQUITA	34	2	2	RJ	2	1	2	1	1		1	0		17	2	1	2	3	1	0	FALSE	FALSE	FALSE	FALSE	0
267	MESQUITA	25	2	2	RJ	1	1	1	1	2		1	1	0	17	2	1	2	3	1	0	FALSE	FALSE	FALSE	FALSE	0
268	MESQUITA	30	2	2	RJ	1	1	2	1	1		0	0		21	2	1	1	3	1	0	FALSE	FALSE	FALSE	FALSE	0
269	MESQUITA	27	2	1	RJ	2	1	2	1	1		0	0		17	2	1	1	3	1	0	FALSE	FALSE	FALSE	FALSE	0
270	MESQUITA	26	2	2	BAHIA	1	1	2	2	1		1	0		16	2	2	2	3	2	0	FALSE	FALSE	FALSE	FALSE	0
271	MESQUITA	20	1	2	RJ	1	1	1	1	1		1	0		12	1	1	1	3	2	0	FALSE	FALSE	FALSE	FALSE	0
272	MESQUITA	27	2	2	RJ	1	1	1	1	1		1	0		18	2	1	1	3	1	0	FALSE	FALSE	FALSE	FALSE	0
273	MESQUITA	23	1	2	RJ	1	1	1	1	2		2	0		13	1	1	1	3	2	0	FALSE	FALSE	FALSE	FALSE	0
274	MESQUITA	25	2	2	RJ	3	2	2	1	1		0	0		18	2	1	1	3	1	0	FALSE	FALSE	FALSE	FALSE	0
275	MESQUITA	18	1	2	RJ	1	1	2	1	1		0	0		14	1	1	1	3	1	0	FALSE	FALSE	FALSE	FALSE	0
276	MESQUITA	16	1	2	RJ	3	2	2	2	1		0	0		14	1	1	1	3	2	0	FALSE	FALSE	FALSE	FALSE	0
277	MESQUITA	23	1	1	RJ	1	1	2	2	1		0	0		16	2	2	2	1	1	0	FALSE	FALSE	FALSE	FALSE	0
278	MESQUITA	22	1	2	RJ	5	2	1	2	2		2	0		15	1	1	2	3	1	0	FALSE	FALSE	FALSE	FALSE	0
279	MESQUITA	22	1	1	RJ	1	1	2	2	1		0	0		13	1	1	1	3	2	0	FALSE	FALSE	FALSE	FALSE	0
280	MESQUITA	25	2	2	RJ	2	1	2	2	1		0	1	1	17	2	1	2	3	1	0	FALSE	FALSE	FALSE	FALSE	0
281	MESQUITA	19	1	1	RJ	3	2	2	1	1		0	0		16	2	1	1	3	1	0	FALSE	FALSE	FALSE	FALSE	0
282	MESQUITA	18	1	2	RJ	2	1	2	1	1		0	0		13	1	1	1	3	1	0	FALSE	FALSE	FALSE	FALSE	0
283	MESQUITA	22	1	2	RJ	1	1	1	2	1		0	0		18	2	1	1	3	1	0	FALSE	FALSE	FALSE	FALSE	0
284	MESQUITA	25	2	2	RJ	4	2	1	1	1		0	0		14	1	1	2	3	2	0	FALSE	FALSE	FALSE	FALSE	0
285	MESQUITA	20	1	2	RJ	2	1	2	1	1		0	0		14	1	1	2	3	1	0	FALSE	FALSE	FALSE	FALSE	0
286	MESQUITA	26	2	1	RJ			2	1	1		1	0		17	2	1	1	3	1	0	FALSE	FALSE	FALSE	FALSE	0
287	MESQUITA	19	1	2	RJ	1	1	2	2	1		0	0		17	2	1	1	3	2	0	FALSE	FALSE	FALSE	FALSE	0
288	MESQUITA	25	2	1	RJ	1	1	1	1	2		1	1	2	14	1	1		3	1	0	FALSE	FALSE	FALSE	FALSE	0
289	MESQUITA	27	2	1	RJ	1	1	2	1	1		1	0		16	2	1	1	3	1	0	FALSE	FALSE	FALSE	FALSE	0
290	MESQUITA	28	2	1	PERNAMBUCO	1	1	1	2	2		2	0		16	2	1	2	3	1	0	FALSE	FALSE	FALSE	FALSE	0
291	MESQUITA	29	2	2	RJ	1	1	2	2	2		2	1	1	16	2	1	1	3	1	0	FALSE	FALSE	FALSE	FALSE	0
292	MESQUITA	18	1	2	RJ	1	1	1	1	1		0	0		12	1	1	2	3	1	0	FALSE	FALSE	FALSE	FALSE	0
293	MESQUITA	21	1	2	RJ	2	1	1	1	1		0	0		14	1	1	2	3	1	0	FALSE	FALSE	FALSE	FALSE	0
294	MESQUITA	14	1	2	RJ	1	1	1	2	1		0	0		12	1	1	1	3	1	0	FALSE	FALSE	FALSE	FALSE	0
295	MESQUITA	21	1	1	RJ	2	1	2	2	1		0	0		15	1	1	1	3	1	0	FALSE	FALSE	FALSE	FALSE	0
296	MESQUITA	19	1	1	RJ	2	1	1	1	1		0	0		13	1	1	2	3	1	0	FALSE	FALSE	FALSE	FALSE	0
297	MESQUITA	19	1	2	RJ	1	1	1	1	1		0	0		13	1	1	2	3	1	0	FALSE	FALSE	FALSE	FALSE	0
298	MESQUITA	30	2	2	RJ			2	2	1		1	0		17	2	1	2	3	1	0	FALSE	FALSE	FALSE	FALSE	0
299	MESQUITA	20	1	2	RJ	1	1	2	1	1		0	0		16	2	1	1	3	2	0	FALSE	FALSE	FALSE	FALSE	0
300	MESQUITA	18	1	2	RJ	1	1	1	1	1		0	0		16	2	1	1	3	1	0	FALSE	FALSE	FALSE	FALSE	0
301	MESQUITA	18	1	2	RJ	1	1	2	2	1		0	0		14	1	1	1	3	1	0	FALSE	FALSE	FALSE	FALSE	0
302	MESQUITA	23	1	1	RJ	3	2	2	1	1		0	0		14	1	1	2	3	1	0	FALSE	FALSE	FALSE	FALSE	0
303	MESQUITA	25	2	2	RJ	2	1	2	1	1		1	0		17	2	1	1	3	1	0	FALSE	FALSE	FALSE	FALSE	0
304	MESQUITA	18	1	2	RJ	1	1	2	2	1		0	0		16	2	1	1	1	1	0	FALSE	FALSE	FALSE	FALSE	0
305	MESQUITA	22	1	2	RJ	1	1	2	2	1		0	0		19	2	1	1	3	1	0	FALSE	FALSE	FALSE	FALSE	0
306	MESQUITA	41	2	1	PERNAMBUCO	1	1	1	1	2		3	0		20	2	1	1	3	1	0	FALSE	FALSE	FALSE	FALSE	0
307	MESQUITA	18	1	1	RJ	1	1	1	2	1		0	0		14	1	1	1	3	1	0	FALSE	TRUE	FALSE	FALSE	0
308	MESQUITA	30	2	1	RJ	2	1	2	1	2		2	1	2	21	2	1	2	3	2	0	FALSE	FALSE	FALSE	FALSE	0
309	MESQUITA	18	1	2	RJ	2	1	2	1	1		0	1	1	14	1	1	1	3	1	0	FALSE	FALSE	FALSE	TRUE	1
310	MESQUITA	29	2	2	RJ	2	1	1	1	2		4	0		18	2	1	1	3	2	0	FALSE	FALSE	FALSE	FALSE	0
311	MESQUITA	21	1	2	RJ	1	1	1	1	2		1	1	1	14	1	1	1	3	1	0	FALSE	FALSE	FALSE	FALSE	0
312	MESQUITA	20	1	2	RJ	2	1	2	1	1		0	0		17	2	1	1	3	1	0	FALSE	FALSE	FALSE	FALSE	0
313	MESQUITA	25	2	2	RJ	1	1	2	1	2		2	0		14	1	1	1	3	1	0	FALSE	FALSE	FALSE	FALSE	0
314	MESQUITA	27	2	1	RJ	1	1	1	2	2		2	1	2	16	2	1	2	3	2	0	FALSE	FALSE	FALSE	FALSE	0
315	MESQUITA	22	1	2	RJ	3	2	2	2	1		0	0		18	2	1	1	3	1	0	FALSE	FALSE	FALSE	FALSE	0
316	MESQUITA	22	1	2	RJ	1	1	2	1	1		0	0		16	2	1	1	1	1	0	FALSE	FALSE	FALSE	FALSE	0
317	MESQUITA	27	2	1	RJ	5	2	2	1	1		0	0		17	2	1	1	3	2	0	FALSE	FALSE	FALSE	FALSE	0
318	MESQUITA	19	1	2	RJ	2	1	1	2	1		1	0		14	1	2	2	2	1	0	FALSE	FALSE	FALSE	FALSE	0
319	MESQUITA	24	1	2	RJ	2	1	1	1	2		2	0		15	1	1	1	3	1	0	FALSE	FALSE	FALSE	FALSE	0
320	MESQUITA	23	1	2	RJ	1	1	2	2	1		0	0		17	2	3	2	3	1	0	FALSE	FALSE	FALSE	FALSE	0
321	MESQUITA	27	2	2	PARA	4	2	2	2	1		0	0		22	2	1	1	3	2	0	FALSE	FALSE	FALSE	FALSE	0
322	MESQUITA	25	2	2	RJ	2	1	2	1	1		0	0		21	2	1	1	3	2	0	FALSE	FALSE	FALSE	FALSE	0
323	MESQUITA	27	2	2	RJ	1	1	2	2	2		3	1	1	15	1	1	1	3	1	0	FALSE	FALSE	FALSE	FALSE	0
324	MESQUITA	28	2	2	RJ	2	1	2	1	1		0	0		17	2	1	1	3	1	0	FALSE	FALSE	FALSE	FALSE	0
325	MESQUITA	25	2	2	RJ	2	1	1	1	2		2	0		16	2	1	2	3	1	0	FALSE	FALSE	FALSE	FALSE	0
326	MESQUITA	28	2	2	RJ	2	1	2	1	1		1	0		14	1	1		3	1	0	FALSE	FALSE	FALSE	FALSE	0
327	MESQUITA	27	2	2	RJ	1	1	1	1	1		1	0		18	2	1	1	3	2	0	FALSE	FALSE	FALSE	FALSE	0
328	MESQUITA	15	1	2	RJ	1	1	1	1	1		0	0		13	1	1	1	3	2	0	FALSE	FALSE	FALSE	FALSE	0
329	MESQUITA	35	2	1	RJ	2	1	2	1	1		0	1	1	16	2	1	2	1	1	0	FALSE	FALSE	FALSE	FALSE	0
330	MESQUITA	18	1	1	RJ	1	1	2	1	1		0	1	1	15	1	2	1	3	2	0	FALSE	FALSE	FALSE	FALSE	0
331	MESQUITA	22	1	2	RJ	3	2	2	2	1		0	1	1	18	2	1	1	3	1	0	FALSE	FALSE	FALSE	FALSE	0
332	MESQUITA	17	1	2	RJ	3	2	2	2	1		0	0		15	1	1	1	3	1	0	FALSE	FALSE	FALSE	TRUE	1
333	MESQUITA	20	1	2	RJ	3	2	1	2	1		1	0		14	1	1	2	3	1	0	FALSE	FALSE	FALSE	FALSE	0
334	MESQUITA	22	1	2	RJ	2	1	2	1	1		0	0		19	2	1	1	3	1	0	FALSE	FALSE	FALSE	FALSE	0
335	MESQUITA	20	1	1	RJ	4	2	2	1	1		1	0		15	1	1	2	3	1	0	FALSE	FALSE	FALSE	FALSE	0
336	MESQUITA	25	2	2	RJ	1	1	2	2	1		0	0		15	1	1	2	3	1	0	FALSE	FALSE	FALSE	TRUE	1
337	MESQUITA	18	1	2	RJ	2	1	2	1	1		0	0		16	2	1	1	3	2	0	FALSE	FALSE	FALSE	FALSE	0
338	MESQUITA	23	1	2	RJ	1	1	2	1	1		1	0		16	2	1	1	3	1	0	FALSE	FALSE	FALSE	FALSE	0
339	MESQUITA	19	1	2	MINAS GERAIS	1	1	1	1	1		0	0		18	2	1	1	3	1	0	FALSE	FALSE	FALSE	FALSE	0
340	MESQUITA	21	1	1	RJ	1	1	2	2	1		0	0		14	1	1	1	2	1	0	FALSE	FALSE	FALSE	FALSE	0
341	MESQUITA	32	2	2	RJ	4	2	1	1	2		2	1	4	15	1	1	1	3	1	0	FALSE	FALSE	FALSE	FALSE	0
342	MESQUITA	24	1	1	RJ	2	1	2	1	1		0	0		15	1	1	1	3	1	0	FALSE	FALSE	FALSE	FALSE	0
343	MESQUITA	28	2	2	RJ	1	1	2	1	1		1	0		15	1	1	1	3	2	0	FALSE	FALSE	FALSE	FALSE	0
344	MESQUITA	26	2	2	RJ	1	1	2	1	1		0	0		17	2	1	1	2	1	0	FALSE	FALSE	FALSE	FALSE	0
345	MESQUITA			2	RJ	1	1	1	1	1		0	0		14	1	1	1	3	1	0	FALSE	FALSE	FALSE	FALSE	0
346	MESQUITA	36	2	2	RJ	3	2	2	1	1		1	0		18	2	1	1	3	1	0	FALSE	FALSE	FALSE	FALSE	0
347	MESQUITA	20	1	2	RJ	1	1	2	2	1		0	0		17	2	1	1	3	2	0	FALSE	FALSE	FALSE	FALSE	0
348	MESQUITA	19	1	1	RJ	1	1	2	1						16	2	1	1	3	1	0	FALSE	FALSE	FALSE	FALSE	0
349	MESQUITA	24	1		RJ	2	1	1	2	1		0	0		16	2	1	1	3	1	0	FALSE	FALSE	FALSE	FALSE	0
350	MESQUITA	27	2	1	RJ	2	1	2	1	1		1	0		15	1	1	1	3	1	0	FALSE	FALSE	FALSE	FALSE	0
351	MESQUITA	24	1		PARAIBA	2	1	1	1	1		0	0		17	2	1	1	1	1	0	FALSE	FALSE	FALSE	FALSE	0
352	MESQUITA	31	2	2	RJ	1	1	2	1	2		2	0		18	2	1		3	2	0	FALSE	FALSE	FALSE	FALSE	0
353	MESQUITA	25	2	1	RJ	1	1	2	1	1		0	0		16	2	1	2	3	2	0	FALSE	FALSE	FALSE	FALSE	0
354	MESQUITA	37	2	1	RJ	1	1	1	1	2		2	1	2	16	2	1	1	3	2	0	FALSE	FALSE	FALSE	FALSE	0
355	MESQUITA	18	1	2	RJ	1	1	2	1	1		0	0		16	2	1	1	3	1	0	FALSE	FALSE	FALSE	FALSE	0
356	MESQUITA	19	1	2	RJ	1	1	1	2	1		0	0		16	2	1	1	3	1	0	FALSE	FALSE	FALSE	FALSE	0
357	MESQUITA	17	1	2	RJ	2	1	2	2	1		0	0		14	1	1	1	3	2	0	FALSE	FALSE	FALSE	FALSE	0
358	MESQUITA	17	1	2	RJ	2	1	1	1	1		0	0		15	1	2	1	3	2	0	FALSE	FALSE	FALSE	FALSE	0
359	MESQUITA	35	2	2	CEARA	1	1	1	1	2		3	1	2	15	1	1	1	3	1	0	FALSE	FALSE	FALSE	FALSE	0
360	MESQUITA	22	1	2	RJ	1	1	2	1	1		1	0		15	1	1	1	3	2	0	FALSE	FALSE	FALSE	FALSE	0
361	MESQUITA	20	1	1	RJ	2	1	2	1	1		0	0		14	1	1	1	3	1	0	FALSE	FALSE	FALSE	FALSE	0
362	MESQUITA	27	2	1	RJ	1	1	2	1	1		0	0		24	2	1	1	3	2	0	FALSE	FALSE	FALSE	FALSE	0
363	MESQUITA	31	2	2	RJ	1	1	1	1	1		0	0		15	1	1	1	3	2	0	FALSE	FALSE	FALSE	TRUE	1
364	MESQUITA	20	1	2	RJ	1	1	1	1	1		0	0		16	2	1	1	3	1	0	FALSE	FALSE	FALSE	FALSE	0
365	MESQUITA	25	2	2	RJ	1	1	2	1	1		0	0		25	2	1	1	2	1	0	FALSE	FALSE	FALSE	FALSE	0
366	MESQUITA	19	1	2	RJ	1	1	1	1	1		0	0		16	2	1	1	3	1	0	FALSE	FALSE	FALSE	FALSE	0
367	MESQUITA	22	1	2	RJ	1	1	2	1	1		0	0		13	1	1	2	3	2	0	FALSE	FALSE	FALSE	FALSE	0
368	MESQUITA	25	2	2	RJ	1	1	2	1	1		0	0		23	2	1	1	1	1	0	FALSE	FALSE	FALSE	FALSE	0
369	MESQUITA	23	1	2	RJ	2	1	2	1	1		0	0		14	1	1	2	1	1	0	FALSE	FALSE	FALSE	FALSE	0
370	MESQUITA	21	1	2	RJ	1	1	2	1	1		1	0		16	2	1	1	3	1	0	FALSE	TRUE	FALSE	FALSE	0
371	MESQUITA	21	1	2	RJ	1	1	1	1	1		0	0		10	1	1	1	3	2	0	FALSE	FALSE	FALSE	FALSE	0
372	MESQUITA	25	2	2	RJ	1	1	1	2	2		3	0		14	1	1	1	3	1	0	FALSE	FALSE	FALSE	FALSE	0
373	MESQUITA	31	2	2	RJ	1	1	2	2	2		3	0		13	1	1	2	3	1	0	FALSE	FALSE	FALSE	FALSE	0
374	MESQUITA	25	2	2	RJ	4	2	2	1	2		1	1	1	19	2	6	2	3	1	0	FALSE	FALSE	FALSE	FALSE	0
375	MESQUITA	24	1	2	RJ	1	1	1	2	1		0	0		15	1	2	2	1	1	0	FALSE	FALSE	FALSE	FALSE	0
376	MESQUITA	26	2	2	RJ	1	1	2	1	1		1	0		18	2	1	1	3	1	0	FALSE	FALSE	FALSE	FALSE	0
377	MESQUITA	19	1	2	RJ	1	1	2	1	1		0	0		15	1	1	2	3	2	0	FALSE	FALSE	FALSE	FALSE	0
378	MESQUITA	29	2	2	RJ	1	1	2	1	2		3	0		16	2	1	2	3	1	0	FALSE	FALSE	FALSE	FALSE	0
379	MESQUITA	21	1	2	RJ	2	1	1	2	1		0	0		16	2	1	1	3	1	0	FALSE	FALSE	FALSE	FALSE	0
380	MESQUITA	17	1	2	RJ	1	1	2	1	1		0	0		14	1	1	1	3	2	0	FALSE	FALSE	FALSE	FALSE	0
381	MESQUITA	19	1	2	RJ	1	1	1	1	1		0	0		15	1	1	1	3	1	0	FALSE	FALSE	FALSE	FALSE	0
382	MESQUITA	21	1	2	RJ	3	2	1	2	1		0	0		15	1	2	2	3	1	0	FALSE	FALSE	FALSE	FALSE	0
383	MESQUITA	19	1	1	RJ	4	2	2	1	1		1	0		12	1	1	2	3	1	0	FALSE	FALSE	FALSE	FALSE	0
384	MESQUITA	23	1	2	RJ	3	2	2	1	1		0	0		17	2	1	1	3	2	0	FALSE	FALSE	FALSE	FALSE	0
385	MESQUITA	19	1	2	RJ	1	1	2	1	1		0	0		17	2	1	1	3	1	0	FALSE	FALSE	FALSE	FALSE	0
386	MESQUITA	28	2	2	RJ	3	2	2	2	1		0	0		21	2	1	1	3	1	0	FALSE	FALSE	FALSE	FALSE	0
387	MESQUITA	43	2	1	SAO PAULO	1	1	1	2			6	1	1	17	2	1	2	3	2	0	FALSE	FALSE	FALSE	FALSE	0
388	MESQUITA	16	1	2	RJ	1	1	2	2	1		0	0		15	1	1	1	3	2	0	FALSE	FALSE	FALSE	FALSE	0
389	MESQUITA	30	2	1	RJ	4	2	2	2	1		0	1	1	17	2	1	2	3	2	0	FALSE	FALSE	FALSE	FALSE	0
390	MESQUITA	34	2	2	RJ	1	1	2	1	2		3	0		17	2	1	1	3	2	0	FALSE	FALSE	FALSE	FALSE	0
391	MESQUITA	24	1	2	RJ	2	1	2	1	1		1	0		16	2	1	1	3	1	0	FALSE	FALSE	FALSE	FALSE	0
392	MESQUITA	35	2	2	RJ	1	1	2	1	2		3	0		19	2	1	1	3	1	0	FALSE	FALSE	FALSE	FALSE	0
393	MESQUITA	35	2	1	RJ	1	1	2	1	2		3	0		21	2	1	1	3	1	0	FALSE	FALSE	FALSE	FALSE	0
394	MESQUITA	25	2	1	RJ	1	1	2	2	1		1	0		17	2	1	1	3	1	0	FALSE	FALSE	FALSE	FALSE	0
395	MESQUITA	16	1	2	RJ	1	1	1	2	1		0	1	1	13	1	1	1	3	1	0	FALSE	FALSE	FALSE	FALSE	0
396	MESQUITA	21	1	1	RJ	2	1	2	1	1		0	0		17	2	1	1	3	2	0	FALSE	FALSE	FALSE	FALSE	0
397	MESQUITA	28	2	1	RJ	2	1	2	1	1		0	0		26	2	1	1	3	1	0	FALSE	FALSE	FALSE	FALSE	0
398	MESQUITA	19	1	2	RJ	1	1	2	1	1		0	0		17	2	1	1	3	1	0	FALSE	FALSE	FALSE	FALSE	0
399	MESQUITA	22	1	1	RJ	1	1	1	2	2		3	0		15	1	1	1	3	1	0	FALSE	FALSE	FALSE	FALSE	0
400	MESQUITA	22	1	2	RJ	2	1	2	1	1		0	0		19	2	1	1	3	1	0	FALSE	FALSE	FALSE	FALSE	0
401	MESQUITA	17	1	1	RJ	2	1	1	2	1		0	0		17	2	1	1	3	1	0	FALSE	FALSE	FALSE	FALSE	0
402	MESQUITA	17	1	2	RJ	1	1	1	1	1		0	0		13	1	1	1	3	1	0	FALSE	FALSE	FALSE	FALSE	0
403	MESQUITA	25	2	2	RJ	1	1	2	1	1		1	0		15	1	1	1	3	1	0	FALSE	FALSE	FALSE	FALSE	0
404	MESQUITA	29	2	2	RIO GRANDE DO NORTE	3	2	2	1	2		2	0		18	2	1	1	3	2	0	FALSE	FALSE	FALSE	FALSE	0
405	MESQUITA	32	2	1	RJ	2	1	2	1	1		1	0		17	2	1	1	3	2	0	FALSE	FALSE	FALSE	FALSE	0
406	MESQUITA	20	1	1	RJ	2	1	2	1	1		0	0		16	2	1	1	1	1	0	FALSE	FALSE	FALSE	FALSE	0
407	MESQUITA	18	1		RJ	2	1	1	1	1		0	1	1	14	1	1	1	3	2	0	FALSE	FALSE	FALSE	FALSE	0
408	MESQUITA	39	2	1	RJ	1	1	1	1	1		0	0		19	2	1	1	3	2	0	FALSE	FALSE	FALSE	FALSE	0
409	MESQUITA	18	1	2	RJ	1	1	2	1	1		0	0		15	1	1	1	3	2	0	FALSE	FALSE	FALSE	FALSE	0
410	MESQUITA	32	2	2	RJ	1	1	2	1	2		2	0		18	2	1	2	3	1	0	FALSE	FALSE	FALSE	FALSE	0
411	MESQUITA	21	1	1	RJ	2	1	2	1	1		0	0		16	2	1	2	2	1	0	FALSE	FALSE	FALSE	FALSE	0
412	MESQUITA	31	2	2	RJ	1	1	2	1	1		0	0		18	2	1	2	3	1	0	FALSE	FALSE	FALSE	TRUE	1
413	MESQUITA	23	1	2	RJ	1	1	2	1	2		1	1	1	16	2	1	1	3	1	0	FALSE	FALSE	FALSE	FALSE	0
414	MESQUITA	17	1	1	RJ	1	1	1	1	1		0	0		13	1	1	2	3	1	0	FALSE	FALSE	FALSE	TRUE	1
415	MESQUITA	30	2	1	RIO GRANDE DO NORTE	1	1	2	1	2		3	1	2	14	1	1	1	3	2	0	FALSE	FALSE	FALSE	FALSE	0
416	MESQUITA	16	1	2	RJ	2	1	2	1	1		0	0		15	1	1	1	3	1	0	FALSE	FALSE	FALSE	FALSE	0
417	MESQUITA	29	2	1	RJ	2	1	2	2	2		2	0		18	2	1	1	3	1	0	FALSE	FALSE	FALSE	FALSE	0
418	MESQUITA	39	2	2	RJ	2	1	1	1	2		7	0		19	2	1	2	3	1	0	FALSE	FALSE	FALSE	FALSE	0
419	MESQUITA	20	1	2	RJ	1	1	2	2	1		1	0		17	2	1	1	3	1	0	FALSE	FALSE	FALSE	FALSE	0
420	MESQUITA	30	2	2	RJ	1	1	1	1	2		2	0		16	2	1	1	3	2	0	FALSE	FALSE	FALSE	FALSE	0
421	MESQUITA	37	2	2	PERNAMBUCO	1	1	2	1	1		0	0		32	2	1	1	3	1	0	FALSE	FALSE	FALSE	FALSE	0
422	MESQUITA	18	1	2	ALAGOAS	1	1	2	1	1		0	0		16	2	1	1	3	1	0	FALSE	FALSE	FALSE	FALSE	0
423	MESQUITA	24	1	2	RJ	1	1	2	1	2		1	1	1	14	1	1	1	3	2	0	FALSE	FALSE	FALSE	FALSE	0
424	MESQUITA	31	2	2	RJ	4	2	2	2	2		2	0		15	1	1	2	3	2	0	FALSE	FALSE	FALSE	FALSE	0
425	MESQUITA	22	1	2	RJ	3	2	2	1	1		0	0		17	2	1	1	3	1	0	FALSE	FALSE	FALSE	FALSE	0
426	MESQUITA	33	2	2	RJ	1	1	2	1	1		0	0		19	2	1	1	3	1	0	FALSE	FALSE	FALSE	FALSE	0
427	MESQUITA	22	1	2	RJ	1	1	2	1	1		0	0		15	1	1	1	3	1	0	FALSE	FALSE	FALSE	FALSE	0
428	MESQUITA	28	2	2	RJ	1	1	2	1	1		1	0		16	2	1	1	3	2	0	FALSE	FALSE	FALSE	FALSE	0
429	MESQUITA	23	1	2	RJ	3	2	2	1	2		1	1	0	14	1	1	1	3	2	0	FALSE	FALSE	FALSE	FALSE	0
430	MESQUITA	26	2	2	RJ	2	1	1	1						13	1	2	2	3	2	0	FALSE	FALSE	FALSE	FALSE	0
431	MESQUITA	22	1	1	RJ	1	1	1	2	2		3	0		17	2	1	1	3	2	0	FALSE	FALSE	FALSE	FALSE	0
432	MESQUITA	18	1	1	RJ			1	1	2		1	1	1	13	1	1	2	3	1	0	FALSE	FALSE	FALSE	FALSE	0
433	MESQUITA	22	1	2	RJ	1	1	2	1	2		3	0		13	1	1	1	3	2	0	FALSE	FALSE	FALSE	FALSE	0
434	MESQUITA	28	2	2	RJ	1	1	2	2	2		2	0		14	1	1	2	3	1	0	FALSE	FALSE	FALSE	FALSE	0
435	MESQUITA	24	1	1	RJ	2	1	2	1	1		1	0		14	1	1	1	3	1	0	FALSE	FALSE	FALSE	FALSE	0
436	MESQUITA	18	1	1	RJ	2	1	2	1	1		0	0		17	2	1	1	3	1	0	FALSE	FALSE	FALSE	FALSE	0
437	MESQUITA	20	1	1	PARAIBA	1	1	2	1	2		2	0		14	1	1	1	3	2	0	FALSE	FALSE	FALSE	FALSE	0
438	MESQUITA	14	1	2	RJ	1	1	1	1	1		0	0		12	1	1	1	3	1	0	FALSE	FALSE	FALSE	FALSE	0
439	MESQUITA	19	1	2	RJ	3	2	2	1	1		0	0		19	2	1	1	3	1	0	FALSE	FALSE	FALSE	FALSE	0
440	MESQUITA	21	1	1	RJ	4	2	2	1	1		0	0		15	1	3		3	1	0	FALSE	FALSE	FALSE	FALSE	0
441	MESQUITA	24	1	2	MINAS GERAIS	1	1	2	1	1		1	0		19	2	1	1	3	1	0	FALSE	FALSE	FALSE	TRUE	1
442	MESQUITA	21	1	1	RJ	2	1	2	2	1		1	0		15	1	3	2	1	1	0	FALSE	FALSE	FALSE	FALSE	0
443	MESQUITA	19	1	1	RJ	2	1	2	1						15	1	1	1	3	1	0	FALSE	FALSE	FALSE	FALSE	0
444	MESQUITA	21	1	1	RJ	1	1	2	1	1		0	0		17	2	1	1	3	1	0	FALSE	FALSE	FALSE	FALSE	0
445	MESQUITA	40	2	2	RJ	1	1	1	1	2		3	1	1	22	2	1	1	3	2	0	FALSE	FALSE	FALSE	FALSE	0
446	MESQUITA	21	1	2	RJ	2	1	2	1	1		0	0		17	2	1	1	3	2	0	FALSE	FALSE	FALSE	FALSE	0
447	MESQUITA	20	1	2	RJ	1	1	1	1	1		1	0		16	2	1	1	3	1	0	FALSE	FALSE	FALSE	FALSE	0
448	MESQUITA	21	1	2	RJ	1	1	1	1	1		0	0		15	1	1		3	2	0	FALSE	FALSE	FALSE	FALSE	0
449	MESQUITA	20	1	2	RJ	1	1	2	2	1		0	0		16	2	1	1	3	1	0	FALSE	FALSE	FALSE	FALSE	0
450	MESQUITA	21	1	2	RJ	1	1	2	1	1		0	0		19	2	1	1	3	2	0	FALSE	FALSE	FALSE	FALSE	0
451	MESQUITA	19	1	2	RJ	3	2	2	1	1		0	0		14	1	1	1	3	2	0	FALSE	FALSE	FALSE	FALSE	0
452	MESQUITA	19	1	2	RJ	1	1	2	2	1		0	0		17	2	1	1	3	2	0	FALSE	FALSE	FALSE	FALSE	0
453	MESQUITA	25	2	2	RJ	1	1	2	1	1		0	0		14	1	1	1	3	2	0	FALSE	FALSE	FALSE	FALSE	0
454	MESQUITA	21	1	2	RJ	3	2	2	1	2		2	0		16	2	1	1	3	1	0	FALSE	FALSE	FALSE	FALSE	0
455	MESQUITA	19	1	2	RJ	2	1	2	1	1		0	0		17	2	1	1	3	1	0	FALSE	FALSE	FALSE	FALSE	0
456	MESQUITA	15	1	2	RJ	1	1	1	1	1		0	0		15	1	1	1	3	2	0	FALSE	FALSE	FALSE	FALSE	0
457	MESQUITA	20	1	2	RJ	6	2	2	1	1		1	0		16	2	1	1	3	1	0	FALSE	FALSE	FALSE	TRUE	1
458	MESQUITA	29	2	2	RJ	1	1	2	2	2		2	0		16	2	1	1	3	2	0	FALSE	FALSE	FALSE	TRUE	1
459	MESQUITA	25	2	2	RJ	2	1	2	1	2		2	0		14	1	1	1	3	1	0	FALSE	FALSE	FALSE	FALSE	0
460	MESQUITA	17	1	2	RJ	1	1	2	2	1		0	0		16	2	1	1	3	1	0	FALSE	FALSE	FALSE	FALSE	0
461	MESQUITA	23	1	2	BAHIA	1	1	2	1	1		0	0		13	1	1	2	3	1	0	FALSE	FALSE	FALSE	FALSE	0
462	MESQUITA	22	1	2	RJ	2	1	1	1						13	1	2	2	2	1	0	FALSE	FALSE	FALSE	TRUE	1
463	MESQUITA	23	1	2	RJ	1	1	2	2	1		1	0		15	1	1		3	1	0	FALSE	FALSE	FALSE	FALSE	0
464	MESQUITA	24	1	2	RJ	2	1	1	1	1		1	0		13	1	1	2	3	1	0	FALSE	FALSE	FALSE	FALSE	0
465	MESQUITA	28	2	2	RJ	1	1	2	1	2		2	0		15	1	1	1	3	2	0	FALSE	FALSE	FALSE	FALSE	0
466	MESQUITA	38	2	2	RJ	1	1	2	1	2		3	0		20	2	1	1	3	2	0	FALSE	FALSE	FALSE	FALSE	0
467	MESQUITA	20	1	2	RJ	1	1	2	2	1		0	0		18	2	1	1	3	2	0	FALSE	FALSE	FALSE	FALSE	0
468	MESQUITA	20	1	2	RJ	1	1	1	2	1		0	0		16	2	2	2	1	1	0	FALSE	FALSE	FALSE	TRUE	1
469	MESQUITA	25	2	2	RJ	1	1	2	1	1		0	0		13	1	1	1	3	2	0	FALSE	FALSE	FALSE	FALSE	0
470	MESQUITA	33	2	1	RJ	1	1	2	1	1		1	0		17	2	1	2	3	2	0	FALSE	FALSE	FALSE	FALSE	0
471	MESQUITA	16	1	1	RJ	1	1	1	1	1		0	0		16	2	1	1	3	1	0	FALSE	FALSE	FALSE	FALSE	0
472	MESQUITA	15	1	2	RJ	1	1	1	1	1		0	0		13	1	1	2	3	2	0	FALSE	FALSE	FALSE	FALSE	0
473	MESQUITA	23	1	2	RJ	1	1	1	2	2		2	0		16	2	1	1	3	1	0	FALSE	FALSE	FALSE	FALSE	0
474	MESQUITA	23	1	2	RJ	1	1	1	1	1		0	1	1	17	2	1	1	3	2	0	FALSE	FALSE	FALSE	FALSE	0
475	MESQUITA	19	1	1	RJ	1	1	2	1	1		0	1	1	15	1	1	1	3	2	0	FALSE	FALSE	FALSE	FALSE	0
476	MESQUITA	17	1	1	RJ	2	1	2	2	1		0	0		16	2	1	1	2	1	0	FALSE	FALSE	FALSE	FALSE	0
477	MESQUITA	26	2	2	RJ	3	2	2	2	1		1	0		16	2	1	1	3	1	0	FALSE	FALSE	FALSE	FALSE	0
478	MESQUITA	35	2	1	RJ	3	2	2	2	1		0	0		18	2	1	2	3	2	0	FALSE	FALSE	FALSE	FALSE	0
479	MESQUITA	18	1	2	RJ	2	1	1	1	1		1	0		14	1	1	1	3	1	0	FALSE	FALSE	FALSE	FALSE	0
480	MESQUITA	40	2	2	RJ	1	1	1	1	2		1	1	1	17	2	1	1	3	1	0	FALSE	FALSE	FALSE	FALSE	0
481	MESQUITA	18	1	2	RJ	2	1	1	1	2		2	0		10	1	1	1	3	2	0	FALSE	FALSE	FALSE	FALSE	0
482	MESQUITA	36	2	1	RJ	3	2	2	1	1		0	0		20	2	1	1	3	1	0	FALSE	FALSE	FALSE	FALSE	0
483	MESQUITA	15	1	2	RJ	1	1	1	1	1		0	0		14	1	1	1	3	1	0	FALSE	FALSE	FALSE	FALSE	0
484	MESQUITA	17	1	2	RJ	1	1	1	1	1		0	0		15	1	1	1	3	2	0	FALSE	FALSE	FALSE	FALSE	0
485	MESQUITA	24	1	2	RJ	2	1	2	1	1		0	0		16	2	1	2	3	1	0	FALSE	FALSE	FALSE	FALSE	0
486	MESQUITA	21	1	1	RJ	1	1	2	1	1		1	0		16	2	1	1	3	2	0	FALSE	FALSE	FALSE	FALSE	0
487	MESQUITA	22	1	2	RJ	1	1	2	1	1		1	0		17	2	1	2	3	2	0	FALSE	FALSE	FALSE	FALSE	0
488	MESQUITA	26	2	2	RJ	1	1	1	1	2		2	0		17	2	1	1	3	1	0	FALSE	FALSE	FALSE	FALSE	0
489	MESQUITA	20	1	1	RJ	2	1	2	2	1		0	0		15	1	1	1	3	1	0	FALSE	FALSE	FALSE	FALSE	0
490	MESQUITA	20	1	2	RJ	1	1	1	2	1		1	0		14	1	2		3	1	0	FALSE	FALSE	FALSE	FALSE	0
491	MESQUITA	23	1	1	RJ	2	1	2	1	1		1	0		14	1	1	1	3	1	0	FALSE	FALSE	FALSE	FALSE	0
492	MESQUITA	19	1	2	RJ	1	1	2	1						16	2	1	1	3	1	0	FALSE	FALSE	FALSE	FALSE	0
493	MESQUITA	15	1	2	RJ	2	1	1	1	1		0	0		14	1	1	1	3	2	0	FALSE	FALSE	FALSE	FALSE	0
494	MESQUITA	20	1	2	RJ	1	1	2	2	1		0	0		18	2	1	1	3	1	0	FALSE	FALSE	FALSE	FALSE	0
495	MESQUITA	21	1	2	RJ	1	1	1	1	1		1	0		13	1	1	2	3	2	0	FALSE	FALSE	FALSE	FALSE	0
496	MESQUITA	35	2	1	RJ	3	2	2	1	1		1	0		17	2	1	1	3	2	0	FALSE	FALSE	FALSE	FALSE	0
497	MESQUITA	32	2	2	RJ	3	2	2	1	2		1	1	2	18	2	1	1	3	2	0	FALSE	FALSE	FALSE	FALSE	0
498	MESQUITA	24	1	2	RJ	1	1	2	1	1		0	0		21	2	1	2	3	1	0	FALSE	FALSE	FALSE	FALSE	0
499	MESQUITA	15	1	2	RJ	2	1	2	2	1		0	0		14	1	1	1	3	2	0	FALSE	FALSE	FALSE	FALSE	0
500	MESQUITA	21	1	2	VITORIA - ES	1	1	1	2	2		2	1	1	13	1	1		3	2	0	FALSE	FALSE	FALSE	FALSE	0
501	MESQUITA	20	1	2	RJ	1	1	1	1	1		0	0		15	1	1	2	3	1	0	FALSE	FALSE	FALSE	FALSE	0
502	MESQUITA	23	1	2	RJ	2	1	2	1	1		1	0		15	1	1	2	3	2	0	FALSE	FALSE	FALSE	FALSE	0
503	MESQUITA	37	2	1	RJ	3	2	2	1	1		1	0		19	2	1	1	3	2	0	FALSE	FALSE	FALSE	FALSE	0
504	MESQUITA	32	2	2	RJ	1	1	1	1	1		1	0		25	2	1	1	3	2	0	FALSE	FALSE	FALSE	FALSE	0
505	MESQUITA	24	1	1	RJ	2	1	2	1	1		1	0		15	1	1	2	3	1	0	FALSE	FALSE	FALSE	FALSE	0
506	MESQUITA	22	1	1	RJ	1	1	2	1	1		1	0		13	1	1	1	3	1	0	FALSE	FALSE	FALSE	FALSE	0
507	MESQUITA	44	2	2	RJ	1	1	1	2			9	1	1	14	1	1	1	3	2	0	FALSE	FALSE	FALSE	FALSE	0
508	MESQUITA	38	2	2	RJ	1	1	1	2	2		6	0		18	2	1	1	3	1	0	FALSE	FALSE	FALSE	FALSE	0
509	MESQUITA	20	1	2	RJ	1	1	1	1	1		0	0		14	1	1	1	3	1	0	FALSE	FALSE	FALSE	FALSE	0
510	MESQUITA	17	1	2	RJ	1	1	2	1	1		0	0		15	1	1	1	3	1	0	FALSE	FALSE	FALSE	FALSE	0
511	MESQUITA	24	1	1	RJ	1	1	2	1	1		0	0		21	2	1	1	3	2	0	FALSE	FALSE	FALSE	FALSE	0
512	MESQUITA	22	1	1	RJ	2	1	2	1	1		0	0		20	2	1	1	3	1	0	FALSE	FALSE	FALSE	FALSE	0
513	MESQUITA	26	2	1	RJ	1	1	2	1	1		0	0		16	2	1		3	1	0	FALSE	FALSE	FALSE	FALSE	0
514	MESQUITA	33	2	2	BAHIA	1	1	1	1	2		1	1	1	13	1	1	2	3	1	0	FALSE	FALSE	FALSE	FALSE	0
515	MESQUITA	31	2	2	RJ	2	1	1	1	2		5	1	1	15	1	1	1	3	1	0	FALSE	FALSE	FALSE	FALSE	0
516	MESQUITA	31	2	2	CHINA	1	1	2	1	1		1	0		18	2	1	1	3	1	0	FALSE	FALSE	FALSE	FALSE	0
517	MESQUITA	18	1	2	RJ	1	1	1	1	1		0	0		15	1	2	2	3	1	0	FALSE	FALSE	FALSE	FALSE	0
518	MESQUITA	25	2	2	RJ	1	1	1	1	2		3	1	1	15	1	1	2	3	1	0	FALSE	FALSE	FALSE	FALSE	0
519	MESQUITA	24	1	2	RJ	2	1	2	1	1		0	0		19	2	1	1	3	1	0	FALSE	FALSE	FALSE	FALSE	0
520	MESQUITA	19	1	2	RJ	1	1	2	1	1		0	0		17	2	2	2	3	1	0	FALSE	FALSE	FALSE	FALSE	0
521	MESQUITA	25	2	1	RJ	2	1	2	1	1		0	0		17	2	1	1	3	1	0	FALSE	FALSE	FALSE	FALSE	0
522	MESQUITA	20	1	1	RJ	1	1	2	1	1		1	0		14	1	1	2	3	1	0	FALSE	FALSE	FALSE	FALSE	0
523	MESQUITA	23	1	1	RJ	2	1	1	1	1		1	0		17	2	1	1	3	2	0	FALSE	FALSE	FALSE	FALSE	0
524	MESQUITA	19	1	2	MARANHÃO	1	1	2	1	1		0	0		16	2	1	1	3	1	0	FALSE	FALSE	FALSE	FALSE	0
525	MESQUITA	26	2	2	RJ	1	1	2	2	1		1	0		14	1	1	1	3	2	0	FALSE	FALSE	FALSE	FALSE	0
526	MESQUITA	26	2	2	RJ	2	1	2	1	1		0	0		25	2	1	1	3	2	0	FALSE	FALSE	FALSE	FALSE	0
527	MESQUITA	17	1	1	RJ	1	1	1	1	1		0	0		14	1	1	1	2	1	0	FALSE	FALSE	FALSE	FALSE	0
528	MESQUITA	26	2	1	PARAIBA	2	1	2	1	1		1	0		16	2	1	1	3	2	0	FALSE	FALSE	FALSE	FALSE	0
529	MESQUITA	22	1	2	RJ	2	1	2	1	1		0	0		17	2	1	2	3	2	0	FALSE	FALSE	FALSE	FALSE	0
530	MESQUITA	19	1	1	RJ	3	2	2	1	1		0	0		17	2	1	2	3	1	0	FALSE	FALSE	FALSE	TRUE	1
531	MESQUITA	18	1	2	RJ	1	1	2	2	1		0	0		16	2	1	1	1	1	0	FALSE	FALSE	FALSE	FALSE	0
532	MESQUITA	25	2	1	PARAIBA	2	1	2	1	1		0	0		17	2	1	1	3	2	0	FALSE	FALSE	FALSE	FALSE	0
533	MESQUITA	31	2	2	RJ	2	1	2	1	2		2	0		15	1	1	1	3	1	0	FALSE	FALSE	FALSE	FALSE	0
534	MESQUITA	19	1	1	SAO PAULO	1	1	1	2	1		1	0		15	1	1	2	3	2	0	FALSE	FALSE	FALSE	FALSE	0
535	MESQUITA	30	2	1	RJ	2	1	2	1	1		1	0		15	1	1	2	3	2	0	FALSE	FALSE	FALSE	FALSE	0
536	MESQUITA	16	1	2	RJ	1	1	1	1	1		0	0		15	1	1	1	2	1	0	FALSE	FALSE	FALSE	FALSE	0
537	MESQUITA	21	1	1	RJ	1	1	2	1	1		0	0		18	2	1	1	2	1	0	FALSE	FALSE	FALSE	FALSE	0
538	MESQUITA	20	1	2	RJ	1	1	1	2	1		0	0		15	1	1	2	1	1	0	FALSE	FALSE	FALSE	TRUE	1
539	MESQUITA	27	2	2	RJ	1	1	2	2	2		2	1	2	13	1	1	1	3	2	0	FALSE	FALSE	FALSE	FALSE	0
540	MESQUITA	26	2	2	RJ	2	1	1	1	2		2	1	1	15	1	2		3	1	0	FALSE	FALSE	FALSE	FALSE	0
541	MESQUITA	18	1	1	RJ	1	1	1	2	1		0	0		15	1	2	1	3	1	0	FALSE	FALSE	FALSE	FALSE	0
542	MESQUITA	17	1	2	RJ	1	1	2	1	2		1	1	1	23	2	1	2	3	2	0	FALSE	FALSE	FALSE	FALSE	0
543	MESQUITA	17	1	2	RJ	1	1	1	1	1		0	0		15	1	1	1	3	2	0	FALSE	FALSE	FALSE	FALSE	0
544	MESQUITA	20	1	2	PERNAMBUCO	1	1	1	1	1		0	0		14	1	1	1	3	1	0	FALSE	FALSE	FALSE	FALSE	0
545	MESQUITA	36	2	2	RJ	3	2	2	1	1		1	0		16	2	1		3	1	0	FALSE	FALSE	FALSE	FALSE	0
546	MESQUITA	37	2	2	RJ	2	1	2	1	2		2	0		19	2	1	1	3	1	0	FALSE	FALSE	FALSE	FALSE	0
547	MESQUITA	35	2	2	RJ	1	1	1	2	2		4	0		17	2	1	2	3	1	0	FALSE	FALSE	FALSE	FALSE	0
548	MESQUITA	22	1	2	RJ	3	2	2	1						15	1	1	1	3	1	0	FALSE	FALSE	FALSE	FALSE	0
549	MESQUITA	37	2	1	RJ	1	1	2	1	2		2	0		18	2	1	2	3	1	0	FALSE	FALSE	FALSE	FALSE	0
550	MESQUITA	19	1	2	RJ	2	1	1	1	1		1	0		14	1	1	1	3	2	0	FALSE	FALSE	FALSE	FALSE	0
551	MESQUITA	19	1	1	RJ	2	1	2	2	1		0	0		16	2	2	1	3	1	0	FALSE	FALSE	FALSE	FALSE	0
552	MESQUITA	20	1	1	RJ	1	1	2	2	1		0	0		15	1	1	2	3	1	0	FALSE	FALSE	FALSE	FALSE	0
553	MESQUITA	36	2	2	RJ	1	1	1	1	2		1	1	0	17	2	1	2	3	1	0	FALSE	FALSE	FALSE	FALSE	0
554	MESQUITA	28	2	2	RJ	2	1	2	1	1		1	0		20	2	1	1	3	1	0	FALSE	FALSE	FALSE	FALSE	0
555	MESQUITA	17	1	2	PERNAMBUCO	1	1	2	1	1		0	0		16	2	1	1	1	1	0	FALSE	FALSE	FALSE	FALSE	0
556	MESQUITA	26	2	2	RIO GRANDE DO NORTE	2	1	2	1	1		1	0		19	2	1	1	3	2	0	FALSE	FALSE	FALSE	FALSE	0
557	MESQUITA	21	1	2	RJ	2	1	2	1	1		1	0		15	1	1	1	3	2	0	FALSE	FALSE	FALSE	FALSE	0
558	MESQUITA	16	1	2	RJ	1	1	2	2	1		0	0		15	1	1	1	3	1	0	FALSE	FALSE	FALSE	FALSE	0
559	MESQUITA	18	1	2	RJ	2	1	2	2	1		0	0		16	2	1	1	3	2	0	FALSE	FALSE	FALSE	FALSE	0
560	MESQUITA	19	1	2	RJ	2	1	2	1	1		0	0		14	1	1	1	3	1	0	FALSE	FALSE	FALSE	FALSE	0
561	MESQUITA	24	1	2	RJ	2	1	2	1	1		1	0		17	2	1	1	3	2	0	FALSE	FALSE	FALSE	FALSE	0
562	MESQUITA	34	2	2	RJ	1	1	1	1	1		1	0		17	2	1	1	3	1	0	FALSE	FALSE	FALSE	FALSE	0
563	MESQUITA	25	2	2	RJ	1	1	2	1	1		0	0		19	2	1	1	3	2	0	FALSE	FALSE	FALSE	FALSE	0
564	MESQUITA	34	2	2	RJ	5	2	2	1	1		1	0		25	2	1	1	3	2	0	FALSE	FALSE	FALSE	FALSE	0
565	MESQUITA	18	1	1	RJ	2	1	1	1	1		1	0		15	1	1	1	2	1	0	FALSE	FALSE	FALSE	FALSE	0
566	MESQUITA	28	2	2	RJ	2	1	2	1	1		0	0		17	2	1	1	3	2	0	FALSE	FALSE	FALSE	FALSE	0
567	MESQUITA	29	2	2	MARANHAO	2	1	2	1	1		1	0		17	2	1	2	3	2	0	FALSE	FALSE	FALSE	TRUE	1
568	MESQUITA	16	1	1	RJ	1	1	2	1	1		0	0		15	1	1	1	3	2	0	FALSE	FALSE	FALSE	FALSE	0
569	MESQUITA	26	2	2	RJ	2	1	2	1	2		5	0		15	1	1	1	3	2	0	FALSE	FALSE	FALSE	FALSE	0
570	MESQUITA	19	1	1	PIAUI	1	1	2	1	1		0	0		18	2	1	1	3	2	0	FALSE	FALSE	FALSE	FALSE	0
571	MESQUITA	19	1	2	RJ	1	1	1	1	1		0	0		17	2	1	2	3	2	0	FALSE	FALSE	FALSE	TRUE	1
572	MESQUITA	26	2	2	BAHIA	2	1	2	1	1		1	0		15	1	1	1	3	2	0	FALSE	FALSE	FALSE	FALSE	0
573	MESQUITA	20	1	2	RJ	1	1	2	1	1		0	0		18	2	1	1	2	1	0	FALSE	FALSE	FALSE	FALSE	0
574	MESQUITA	39	2	2	RJ	1	1	1	1	2		4	1	1	19	2	1	1	3	2	0	FALSE	FALSE	FALSE	FALSE	0
575	MESQUITA	25	2	2	RJ	1	1	2	1	1		0	0		13	1	2	2	3	1	0	FALSE	FALSE	FALSE	FALSE	0
576	MESQUITA	22	1	2	RJ	2	1	2	1	1		1	0		13	1	1	2	3	2	0	FALSE	FALSE	FALSE	FALSE	0
577	MESQUITA	24	1	1	RJ	2	1	2	1	1		0	1	1	19	2	1	1	3	2	0	FALSE	FALSE	FALSE	FALSE	0
578	MESQUITA	22	1	1	RJ	1	1	2	2	1		1	0		16	2	1	1	1	1	0	FALSE	FALSE	FALSE	FALSE	0
579	MESQUITA	16	1	2	RJ	1	1	1	2	1		0	0		13	1	1	1	3	1	0	FALSE	FALSE	FALSE	FALSE	0
580	MESQUITA	36	2	2	RJ	1	1	2	2	2		3	1	1	18	2	1	2	3	2	0	FALSE	FALSE	FALSE	FALSE	0
581	MESQUITA	18	1	2	RJ	1	1	1	2	1		0	0		16	2	1	1	3	1	0	FALSE	FALSE	FALSE	FALSE	0
582	MESQUITA	26	2	2	RJ	1	1	2	2	2		1	1	0	14	1	1	2	3	1	0	FALSE	FALSE	FALSE	FALSE	0
583	MESQUITA	32	2	2	RJ	1	1	1	2	1		1	0		16	2	1		3	1	0	FALSE	FALSE	FALSE	FALSE	0
584	MESQUITA	15	1	2	RJ	2	1	1	2	1		0	0		14	1	1	1	3	1	0	FALSE	FALSE	FALSE	FALSE	0
585	MESQUITA	23	1	2	RJ	3	2	2	1	1		0	0		18	2	1	2	3	2	0	FALSE	FALSE	FALSE	FALSE	0
586	MESQUITA	20	1	1	RJ	4	2	2	2	1		0	0		15	1	2	2	1	1	0	FALSE	FALSE	FALSE	FALSE	0
587	MESQUITA	24	1	2	RJ	2	1	1	2	2		2	0		13	1	1	2	3	1	0	FALSE	FALSE	FALSE	FALSE	0
588	MESQUITA	20	1	2	RJ	2	1	1	1	1		1	0		15	1	1	1	3	2	0	FALSE	FALSE	FALSE	FALSE	0
589	MESQUITA	20	1	2	RJ	1	1	2	2	1		0	0		13	1	2	1	3	1	0	FALSE	FALSE	FALSE	FALSE	0
590	MESQUITA	32	2	2	RJ	1	1	2	2	2		1	1	2	13	1	1	1	3	2	0	FALSE	FALSE	FALSE	FALSE	0
591	MESQUITA	22	1	1	RJ	2	1	2	2	1		0	0		17	2	1	2	3	1	0	FALSE	FALSE	FALSE	FALSE	0
592	MESQUITA	17	1	1	RJ	1	1	2	1	1		0	0		16	2	1	1	3	1	0	FALSE	FALSE	FALSE	FALSE	0
593	MESQUITA	29	2	2	RJ	1	1	2	2	1		1	0		24	2	1	1	3	2	0	FALSE	FALSE	FALSE	FALSE	0
594	MESQUITA	20	1	2	RJ	2	1	2	2	1		0	0		18	2	1	1	3	1	0	FALSE	FALSE	FALSE	FALSE	0
595	MESQUITA	24	1	2	RJ	1	1	1	1	2		2	0		17	2	1	1	3	2	0	FALSE	FALSE	FALSE	FALSE	0
596	MESQUITA	19	1	2	RJ	1	1	2	2	1		0	0		18	2	1	1	3	1	0	FALSE	FALSE	FALSE	FALSE	0
597	MESQUITA	28	2	2	RJ	1	1	2	1	2		2	0		12	1	1	2	3	2	0	FALSE	FALSE	FALSE	FALSE	0
598	MESQUITA	20	1	1	RJ	1	1	2	2	1		0	0		13	1	2	2	1	1	0	FALSE	FALSE	FALSE	FALSE	0
599	MESQUITA	18	1	2	RJ	2	1	1	1	1		0	0		16	2	1	2	2	1	0	FALSE	FALSE	FALSE	FALSE	0
600	MESQUITA	16	1	2	RJ	4	2	1	2	1		0	0		13	1	1	1	3	2	0	FALSE	FALSE	FALSE	FALSE	0
601	MESQUITA	20	1	2	RJ	1	1	1	1						15	1	1	1	3	2	0	FALSE	FALSE	FALSE	TRUE	1
602	MESQUITA	23	1	2	RJ	1	1	1	1	2		3	0		15	1	1	2	3	1	0	FALSE	FALSE	FALSE	FALSE	0
603	MESQUITA	16	1	2	RJ	2	1	1	2	1		0	0		14	1	1	1	3	2	0	FALSE	FALSE	FALSE	FALSE	0
604	MESQUITA	27	2	2	RJ	1	1	2	1	1		1	0		16	2	2	2	3	2	0	FALSE	FALSE	FALSE	FALSE	0
605	MESQUITA	24	1	2	RJ	1	1	2	2	1		0	0		17	2	1	2	3	2	0	FALSE	FALSE	FALSE	FALSE	0
606	MESQUITA	18	1	1	RJ	6	2	2	2	1		0	0		14	1	2	2	3	1	0	FALSE	FALSE	FALSE	FALSE	0
607	MESQUITA	23	1	2	RJ	1	1	2	1	1		0	0		16	2	1	1	3	1	0	FALSE	FALSE	FALSE	FALSE	0
608	MESQUITA	22	1	2	RJ	2	1	2	1	2		2	0		16	2	1	1	3	1	0	FALSE	FALSE	FALSE	FALSE	0
609	MESQUITA	31	2	2	RJ	1	1	1	2	1		1	0		18	2	1	2	3	2	0	FALSE	FALSE	FALSE	FALSE	0
610	MESQUITA	23	1	2	RJ	1	1	1	1	2		4	0		16	2	1	1	3	2	0	FALSE	FALSE	FALSE	FALSE	0
611	MESQUITA	17	1	1	ESPIRITO SANTO	1	1	2	1	1		0	0		15	1	1	1	3	1	0	FALSE	FALSE	FALSE	FALSE	0
612	MESQUITA	19	1	2	RJ	1	1	1	1	1		1	0		14	1	1		3	2	0	FALSE	FALSE	FALSE	FALSE	0
613	MESQUITA	23	1	1	RJ	2	1	2	2	1		0	0		18	2	1	2	3	1	0	FALSE	FALSE	FALSE	FALSE	0
614	MESQUITA	25	2	1	RJ	1	1	1	1	1		1	0		16	2	1	1	3	1	0	FALSE	FALSE	FALSE	FALSE	0
615	MESQUITA	16	1	1	RJ	1	1	1	1	1		0	0	1	15	1	1	1	3	2	0	FALSE	FALSE	FALSE	FALSE	0
616	MESQUITA	21	1	2	RJ	3	2	1	2	1		0	0		17	2	1	1	3	2	0	FALSE	FALSE	FALSE	TRUE	1
617	MESQUITA	24	1	2	RJ	2	1	2	2	2		1	1	1	16	2	1	2	3	2	0	FALSE	FALSE	FALSE	TRUE	1
618	MESQUITA	17	1	2	RJ	2	1	1	1	1		0	0		14	1	1	1	3	2	0	FALSE	FALSE	FALSE	FALSE	0
619	MESQUITA	18	1	2	RJ	2	1	1	1	1		1	0		12	1	1	1	3	2	0	FALSE	FALSE	FALSE	FALSE	0
620	MESQUITA	24	1	2	RJ	2	1	2	1	1		0	0		19	2	1	1	3	1	0	FALSE	FALSE	FALSE	FALSE	0
621	MESQUITA	24	1	1	RJ	1	1	2	2	1		0	0		18	2	1	2	3	2	0	FALSE	FALSE	FALSE	FALSE	0
622	MESQUITA	18	1	2	RJ	1	1	2	1	1		0	0		16	2	1	1	3	1	0	FALSE	FALSE	FALSE	FALSE	0
623	MESQUITA	19	1	2	RJ	1	1	2	1	1		0	0		14	1	1	1	3	1	0	FALSE	FALSE	FALSE	FALSE	0
624	MESQUITA	38	2	2	BAHIA	1	1	1	1	2		1	1	0	17	2	1	2	3	2	0	FALSE	FALSE	FALSE	FALSE	0
625	MESQUITA	37	2	2	RJ	1	1	1	1	2		3	1	1	15	1	1	1	3	2	0	FALSE	FALSE	FALSE	FALSE	0
626	MESQUITA	22	1	2	RJ	1	1	1	1	2		2	0		12	1	1	2	3	2	0	FALSE	FALSE	FALSE	FALSE	0
627	MESQUITA	27	2	1	RJ	1	1	1	1	1		0	0		17	2	1	1	3	1	0	FALSE	FALSE	FALSE	FALSE	0
628	MESQUITA	20	1	2	RJ	1	1	1	2	2		2	0		14	1	1	1	3	1	0	FALSE	FALSE	FALSE	FALSE	0
629	MESQUITA	15	1	1	RJ	2	1	2	2	1		0	0		14	1	1	1	3	2	0	FALSE	FALSE	FALSE	FALSE	0
630	MESQUITA	24	1	2	RJ	3	2	2	2	1		0	0		14	1	1		3	1	0	FALSE	FALSE	FALSE	FALSE	0
631	MESQUITA	19	1	2	RJ	2	1	2	1	2		1	1	1	14	1	1	1	3	1	0	FALSE	FALSE	FALSE	FALSE	0
632	MESQUITA	28	2	2	RJ	1	1	2	1	1		1	0		18	2	1	1	3	1	0	FALSE	FALSE	FALSE	FALSE	0
633	MESQUITA	38	2	2	RJ	3	2	2	1	1		1	0		18	2	1	2	3	2	0	FALSE	FALSE	FALSE	FALSE	0
634	MESQUITA	31	2	2	RJ	3	2	2	1	2		5	0		13	1	1	1	3	2	0	FALSE	FALSE	FALSE	FALSE	0
635	MESQUITA	23	1	1	RJ	2	1	2	1	1		0	0		13	1	1	1	3	2	0	FALSE	FALSE	FALSE	FALSE	0
636	MESQUITA	35	2	2	RJ	1	1	2	2	2		4	1	1	18	2	1	2	3	1	0	FALSE	TRUE	FALSE	FALSE	0
637	MESQUITA	28	2	2	RJ	3	2	2	1	1		0	0		14	1	1	1	3	1	0	FALSE	FALSE	FALSE	FALSE	0
638	MESQUITA	22	1	1	RJ	1	1	1	1	1		0	0		18	2	1	1	3	2	0	FALSE	FALSE	FALSE	FALSE	0
639	MESQUITA	27	2	1	RJ	3	2	2	1	1		1	0		16	2	1	1	3	2	0	FALSE	FALSE	FALSE	FALSE	0
640	MESQUITA	32	2	2	RJ	1	1	2	2	1		1	0		15	1	1	1	3	1	0	FALSE	FALSE	FALSE	FALSE	0
641	MESQUITA	15	1	2	RJ	1	1	1	2	1		0	0		14	1	1	1	3	1	0	FALSE	FALSE	FALSE	FALSE	0
642	MESQUITA	18	1	2	RJ	1	1	2	2	1		0	0		15	1	1	1	3	1	0	FALSE	FALSE	FALSE	FALSE	0
643	MESQUITA	19	1	2	RJ	1	1	2	1	1		0	0		17	2	1	1	3	1	0	FALSE	FALSE	FALSE	FALSE	0
644	MESQUITA	21	1	1	MARANHAO	2	1	2	2	1		0	0		18	2	1	1	3	1	0	FALSE	FALSE	FALSE	FALSE	0
645	MESQUITA	21	1	2	RJ	1	1	2	2	1		0	0		12	1	2	2	3	2	0	FALSE	FALSE	FALSE	FALSE	0
646	MESQUITA	31	2	2	RJ	1	1	1	1	2		3	0		15	1	1	2	3	1	0	FALSE	FALSE	FALSE	FALSE	0
647	MESQUITA	22	1	2	RJ	2	1	2	1	1		0	0		16	2	1	1	3	1	0	FALSE	FALSE	FALSE	FALSE	0
648	MESQUITA	18	1	1	RJ	2	1	1	2	1		0	0		16	2	1	2	3	1	0	FALSE	FALSE	FALSE	FALSE	0
649	MESQUITA	28	2	1	RJ	2	1	2	1	1		0	0		23	2	1	1	3	2	0	FALSE	FALSE	FALSE	FALSE	0
650	MESQUITA	20	1	2	RJ	2	1	2	2	1		0	0		18	2	2	1	3	2	0	FALSE	FALSE	FALSE	FALSE	0
651	MESQUITA	29	2	2	RJ	1	1	1	1	2		3	0		18	2	1	1	3	1	0	FALSE	FALSE	FALSE	FALSE	0
652	MESQUITA	37	2	2	RJ	1	1	1	1	2		4	0		18	2	1	1	3	1	0	FALSE	FALSE	FALSE	FALSE	0
653	MESQUITA	27	2	2	RJ	1	1	1	1	1		1	0		13	1	1	2	3	1	0	FALSE	FALSE	FALSE	FALSE	0
654	MESQUITA	16	1	2	RJ	1	1	1	2	1		0	0		14	1	1	1	3	2	0	FALSE	FALSE	FALSE	FALSE	0
655	MESQUITA	20	1	2	RJ	1	1	2	1	1		0	0		15	1		2	3	2	0	FALSE	FALSE	FALSE	FALSE	0
656	MESQUITA	23	1	1	RJ	3	2	2	1	1		0	0		14	1	1		3	2	0	FALSE	FALSE	FALSE	FALSE	0
657	MESQUITA	19	1	2	RJ	1	1	1	1	1		0	0		16	2	1	2	3	1	0	FALSE	FALSE	FALSE	FALSE	0
658	MESQUITA	33	2	1	RJ	1	1	2	1	1		1	0		19	2	1	1	1	1	0	FALSE	FALSE	FALSE	FALSE	0
659	MESQUITA	26	2	2	RJ	1	1	2	1	1		1	0		18	2	1	1	3	1	0	FALSE	FALSE	FALSE	FALSE	0
660	MESQUITA	35	2	2	RJ	1	1	1	1	2		4	0		14	1	1	2	3	2	0	FALSE	FALSE	FALSE	FALSE	0
661	MESQUITA	20	1	2	RJ			2	1	1		0	0		14	1	1	1	3	2	0	FALSE	FALSE	FALSE	FALSE	0
662	MESQUITA	20	1	2	RJ	1	1	1	1	1		0	1	1	13	1	1		3	2	0	FALSE	FALSE	FALSE	FALSE	0
663	MESQUITA	17	1	1	RJ	1	1	1	1	1		1	0		15	1	1	1	3	1	0	FALSE	FALSE	FALSE	FALSE	0
664	MESQUITA	29	2	2	RJ	1	1	2	1	1		0	0		18	2	1	1	3	1	0	FALSE	FALSE	FALSE	FALSE	0
665	MESQUITA	20	1	2	RJ	2	1	2	1	1		1	0		17	2	1	1	3	1	0	FALSE	FALSE	FALSE	FALSE	0
666	MESQUITA	18	1	1	ESPIRITO SANTO	1	1	2	1	1		0	0		15	1	1	1	1	1	0	FALSE	FALSE	FALSE	FALSE	0
667	MESQUITA	16	1	2	RJ	3	2	2	1	1		0	0		15	1	1	1	3	1	0	FALSE	FALSE	FALSE	TRUE	1
668	HUPE	35	2	1	RJ	3	2	2	1	2		3	0		21	2	1	1	3	2	0	FALSE	FALSE	FALSE	FALSE	0
669	HUPE	39	2	1	RJ	4	2	1	1	1		1	0		18	2	1	2	3	2	0	FALSE	FALSE	FALSE	FALSE	0
670	HUPE	19	1	1	RJ	2	1	2	1	1		0	0		16	2	1	1	3	1	0	FALSE	FALSE	FALSE	FALSE	0
671	HUPE	23	1	1	RJ	2	1	2	1	2		0	0		15	1	1	2	3	1	0	FALSE	FALSE	FALSE	FALSE	0
672	HUPE	27	2	2	RJ	1	1	1	1	2		4	1	2	16	2	1	1	3	1	0	FALSE	FALSE	FALSE	FALSE	0
673	HUPE	27	2	1	RECIFE	3	2	2	1	1		0	1	2	16	2	1	2	3	1	0	FALSE	FALSE	FALSE	FALSE	0
674	HUPE	31	2	1	RJ	2	1	1	1	2		2	0		16	2	1	1	3	2	0	FALSE	FALSE	FALSE	FALSE	0
675	HUPE	30	2	1	RJ	2	1	2	1	1		1	0		26	2	1	1	3	1	0	FALSE	FALSE	FALSE	FALSE	0
676	HUPE	39	2	2	RJ	3	2	2	1	1		1	0		21	2	1	1	3	2	0	FALSE	FALSE	FALSE	FALSE	0
677	HUPE	25	2	2	RJ	2	1	1	1						19	2	1	1	3	1	0	FALSE	FALSE	FALSE	FALSE	0
678	HUPE	25	2	1	RJ	2	1	1	1	1		0	0		16	2	1	1	3	1	0	FALSE	FALSE	FALSE	FALSE	0
679	HUPE	28	2	2	RJ	1	1	1	1	2		2	0		15	1	1	1	3	2	0	FALSE	FALSE	FALSE	FALSE	0
680	HUPE	16	1	2	RJ	1	1	2	2	1		0	0		15	1	1	1	1	1	0	FALSE	FALSE	FALSE	FALSE	0
681	HUPE	26	2	2	RJ	1	1	2	1	1		0	1	1	15	1	1	1	1	1	0	FALSE	FALSE	TRUE	FALSE	1
682	HUPE	18	1	2	MINAS GERAIS	1	1	1	2	1		0	0		16	2	1	2	1	1	0	FALSE	FALSE	FALSE	FALSE	0
683	HUPE	29	2	2	RJ	1	1	2	2	2		2	0		15	1	1	1	3	1	0	FALSE	FALSE	FALSE	FALSE	0
684	HUPE	27	2	2	RJ	2	1	2	1	2		3	0		14	1	1	1	3	2	0	FALSE	FALSE	FALSE	FALSE	0
685	HUPE	32	2	2	RJ	1	1	1	1	1		0	0		13	1	1	2	3	2	0	FALSE	FALSE	FALSE	FALSE	0
686	HUPE	30	2	1	RJ	2	1	2	1	1		0	0		13	1	1	1	3	2	0	FALSE	FALSE	FALSE	FALSE	0
687	HUPE	23	1	1	RJ	1	1	2	1	2		1	1	1	14	1	1	1	3	1	0	FALSE	FALSE	FALSE	FALSE	0
688	HUPE	36	2	1	RJ	1	1	2	2	2		2	0		16	2	1	2	3	1	0	FALSE	FALSE	FALSE	FALSE	0
689	HUPE	34	2	2	RJ	1	1	1	1	2		3	0		19	2	1	1	2	1	0	FALSE	FALSE	FALSE	FALSE	0
690	HUPE	24	1	2	RJ	1	1	1	2	2		2	0		14	1		1	3	1	0	FALSE	FALSE	FALSE	FALSE	0
691	HUPE	30	2	2	RJ	1	1	2	2	1		0	0		14	1	1	1	3	1	0	FALSE	FALSE	FALSE	FALSE	0
692	HUPE	23	1	1	RJ	4	2	2	1	1		0	0		17	2	1	1	3	2	0	FALSE	FALSE	FALSE	FALSE	0
693	HUPE	28	2	1	BAHIA	1	1	2	1	2		3	0		20	2	1	1	3	2	0	FALSE	FALSE	FALSE	FALSE	0
694	HUPE	16	1	1	RJ	2	1	1	2	1		0	0		14	1	1	1	3	1	0	FALSE	FALSE	FALSE	FALSE	0
695	HUPE	29	2	1	RJ	3	2	2	1	1		0	0		25	2	1	1	3	1	0	FALSE	FALSE	FALSE	FALSE	0
696	HUPE	26	2	2	ÁFRICA	1	1	2	2	1		0	1	1	19	2	1		1	1	0	FALSE	FALSE	FALSE	FALSE	0
697	HUPE	34	2	2	RJ	1	1	2	1	2		3	0		18	2	1	1	1	1	0	FALSE	FALSE	FALSE	FALSE	0
698	HUPE	25	2	1	MARANHÃO	1	1	1	1	2		4	0		13	1	1		3	2	0	FALSE	FALSE	FALSE	FALSE	0
699	HUPE	21	1	2	RJ	2	1	2	1	2		2	0		14	1	1	2	3	1	0	FALSE	FALSE	FALSE	FALSE	0
700	HUPE	33	2	2	RJ	1	1	1	1	2		3	1	1	14	1	1	1	2	1	0	FALSE	FALSE	FALSE	FALSE	0
701	HUPE	21	1	1	RJ	3	2	2	1	1		0	0		17	2	1	1	3	1	0	FALSE	FALSE	FALSE	FALSE	0
702	HUPE	30	2	2	RJ	1	1	2	1	2		1	1	1	18	2	1	1	3	2	0	FALSE	FALSE	FALSE	FALSE	0
703	HUPE	26	2	1	RJ	3	2	2	1	2		2	1	1	15	1	1	2	3	2	0	FALSE	FALSE	FALSE	FALSE	0
704	HUPE	43	2	2	SAO LUIS DO MARANHÃO	3	2	2	1	2		1	1	1	19	2	1	1	3	2	0	FALSE	FALSE	FALSE	FALSE	0
705	HUPE	17	1	1	RJ	2	1	2	1	1		0	0		16	2	1	1	3	1	0	FALSE	FALSE	FALSE	FALSE	0
706	HUPE	29	2	2	RJ	1	1	2	1	2		5	1	1	16	2	1	1	3	1	0	FALSE	FALSE	TRUE	TRUE	1
707	HUPE	28	2	1	RJ	1	1	2	1	2		4	0		15	1	1	1	3	1	0	FALSE	FALSE	FALSE	FALSE	0
708	HUPE	34	2	1	RJ	3	2	2	1	2		2	0		14	1	1		3	1	0	FALSE	FALSE	FALSE	FALSE	0
709	HUPE	31	2	1	CEARA	2	1	2	1	2		3	0		17	2	1	1	3	1	0	FALSE	FALSE	FALSE	FALSE	0
710	HUPE	22	1	1	RJ	1	1	2	2	1		0	0		15	1	1	1	3	2	0	FALSE	FALSE	FALSE	FALSE	0
711	HUPE	27	2	2	RJ	1	1	2	1	2		1	1	1	15	1	1	1	1	1	0	FALSE	FALSE	FALSE	FALSE	0
712	HUPE	20	1	1	RJ	1	1	2	1	1		0	0		14	1	1	1	3	1	0	FALSE	FALSE	FALSE	FALSE	0
713	HUPE	27	2	2	RJ	2	1	2	1	2		2	0		13	1	1	1	3	1	0	FALSE	FALSE	FALSE	FALSE	0
714	HUPE	20	1	2	RJ	2	1	2	1	1		0	0		16	2	1	1	3	1	0	FALSE	FALSE	FALSE	FALSE	0
715	HUPE	32	2	2	RJ	2	1	2	1	1		0	1	1	16	2	1	2	3	1	0	FALSE	FALSE	FALSE	FALSE	0
716	HUPE	36	2	2	RJ	2	1	2	1						16	2	1	1	3	1	0	FALSE	FALSE	FALSE	FALSE	0
717	HUPE	30	2	1	CEARA	2	1	1	1	1		1	0		21	2	1	1	3	2	0	FALSE	FALSE	FALSE	FALSE	0
718	HUPE	31	2	2	SAO PAULO	2	1	2	1	2		5	1	1	13	1	1	2	3	1	1	FALSE	FALSE	FALSE	FALSE	0
719	HUPE	37	2	2	RJ	2	1	1	1	2		2	1	1	19	2	1	1	3	2	0	FALSE	FALSE	FALSE	FALSE	0
720	HUPE	34	2	1	RJ	4	2	2	1	2		2	0		21	2	1	1	3	2	0	FALSE	FALSE	FALSE	FALSE	0
721	HUPE	23	1	1	RJ	1	1	2	1	1		0	0		19	2	1	1	3	1	0	FALSE	FALSE	FALSE	FALSE	0
722	HUPE	22	1	2	RJ	1	1	2	1	1		0	0		17	2	1	1	2	1	0	FALSE	FALSE	FALSE	FALSE	0
723	HUPE	21	1	2	RJ	2	1	2	1	1		0	0		16	2	1	2	3	2	0	FALSE	FALSE	FALSE	FALSE	0
724	HUPE	36	2	2	BAHIA	1	1	2	1	1		1	0		22	2	1	1	3	2	0	FALSE	FALSE	FALSE	FALSE	0
725	HUPE	39	2	2	PARAIBA	2	1	1	1	2		4	0		18	2	1	2	3	2	0	FALSE	FALSE	FALSE	FALSE	0
726	HUPE	15	1	2	RJ	1	1	1	2	1		0	0		14	1	1	1	3	1	0	FALSE	FALSE	FALSE	FALSE	0
727	HUPE	26	2	2	RJ	1	1	2	1	2		2	0		15	1	1	2	3	2	0	FALSE	FALSE	FALSE	FALSE	0
728	HUPE	16	1	2	RJ	1	1	1	2	1		0	0		13	1	1	1	3	2	0	FALSE	FALSE	TRUE	TRUE	1
729	HUPE	21	1	1	RJ	1	1	2	2	1		1	0		15	1	1	1	2	1	0	FALSE	FALSE	FALSE	FALSE	0
730	HUPE	32	2	2	R	3	2	2	1	1		0	0		18	2	1	2	3	2	0	FALSE	FALSE	FALSE	FALSE	0
731	HUPE	30	2	1	RJ	2	1	2	1	2		2	1	1	18	2	1	1	1	1	0	FALSE	FALSE	FALSE	FALSE	0
732	HUPE	15	1	2	RJ	1	1	1	1	1		0	0		12	1	1	2	1	1	0	FALSE	FALSE	FALSE	FALSE	0
733	HUPE	35	2	2	RJ	2	1	2	1	2		2	0		21	2	1	1	3	2	0	FALSE	FALSE	FALSE	FALSE	0
734	HUPE	38	2	2	PERNAMBUCO	1	1	1	2	2		5	0		15	1	2	2	3	2	0	FALSE	FALSE	FALSE	FALSE	0
735	HUPE	37	2	1	RJ	1	1	2	1	1		1	0		16	2	1	1	3	2	0	FALSE	FALSE	FALSE	FALSE	0
736	HUPE	19	1	2	RJ	1	1	2	2	1		0	0		18	2	1	2	1	1	0	FALSE	FALSE	FALSE	FALSE	0
737	HUPE	25	2	1	RJ	3	2	2	2	1		0	0		19	2	1	2	1	1	0	FALSE	FALSE	FALSE	FALSE	0
738	HUPE	24	1	2	RJ	1	1	2	1	2		2	0		16	2	1	2	3	1	0	FALSE	FALSE	FALSE	FALSE	0
739	HUPE	35	2	2	ESPIRITO SANTO	2	1	2	1	2		2	0		20	2	1	1	3	2	0	FALSE	FALSE	FALSE	FALSE	0
740	HUPE	36	2	2	RJ	2	1	2	1	2		1	1	4	21	2	1	2	3	1	0	FALSE	FALSE	FALSE	FALSE	0
741	HUPE	33	2	2	RJ	1	1	2	1	2		4	0		14	1	1		3	2	0	FALSE	FALSE	FALSE	FALSE	0
742	HUPE	35	2	2	RJ	6	2	2	1	2		2	1	2	14	1	1		3	1	0	FALSE	FALSE	FALSE	FALSE	0
743	HUPE	24	1	2	RJ	2	1	2	1	2		2	0		17	2	1	1	3	1	0	FALSE	FALSE	FALSE	FALSE	0
744	HUPE	24	1	1	RJ	3	2	2	1	1		0	0		15	1	1	1	3	2	0	FALSE	FALSE	FALSE	FALSE	0
745	HUPE	18	1	2	RJ	2	1	2	1	1		0	0		16	2	1	1	3	1	0	FALSE	FALSE	FALSE	FALSE	0
746	HUPE	37	2	2	RJ	4	2	2	1	2		5	1	2	16	2	1	2	3	2	0	FALSE	FALSE	FALSE	FALSE	0
747	HUPE	21	1	2	RJ	1	1	2	2	2		2	0		16	2	1	1	2	1	0	FALSE	FALSE	FALSE	FALSE	0
748	HUPE	18	1	2	RJ	1	1	1	2	1		0	1	1	12	1	2	2	3	2	0	FALSE	FALSE	FALSE	FALSE	0
749	HUPE	19	1	2	RJ	2	1	2	1	1		0	0		14	1	1	1	3	1	0	FALSE	FALSE	FALSE	FALSE	0
750	HUPE	31	2	2	RJ	3	2	2	1	2		3	0		14	1	1	1	3	1	0	FALSE	FALSE	FALSE	FALSE	0
751	HUPE	27	2	2	RJ	1	1	2	1	2		1	1	1	16	2	1	1	3	2	0	FALSE	FALSE	FALSE	FALSE	0
752	HUPE	41	2	1	RJ	1	1	2	1	1		0	0		33	2	1	1	1	1	0	FALSE	FALSE	FALSE	FALSE	0
753	HUPE	19	1	2	RJ	1	1	1	2	1		0	0		18	2	1	1	3	2	0	FALSE	FALSE	FALSE	FALSE	0
754	HUPE	21	1	2	RJ	2	1	1	2	1		0	0		15	1	1	2	3	2	0	FALSE	FALSE	FALSE	FALSE	0
755	HUPE	22	1	2	CONGO				1	1		0	0		22	2	1	1	3	2	0	FALSE	FALSE	FALSE	FALSE	0
756	HUPE	37	2	2	RJ	1	1	1	2	2		2	0		14	1	1	2	3	1	0	FALSE	FALSE	FALSE	FALSE	0
757	HUPE	20	1	2	RJ	2	1	2	1	1		0	0		14	1	1	2	3	1	0	FALSE	FALSE	FALSE	FALSE	0
758	HUPE	26	2	2	RJ	1	1	2	2	2		2	0		14	1	1	2	1	1	0	FALSE	FALSE	FALSE	FALSE	0
759	HUPE	35	2	1	CEARA	1	1	1	2	1		1	0		17	2	1	2	3	1	0	FALSE	FALSE	FALSE	FALSE	0
760	HUPE	29	2	2	RJ	1	1	2	1	1		0	0		15	1	1	2	3	1	0	FALSE	FALSE	FALSE	FALSE	0
761	HUPE	39	2	2	RJ	1	1	1	2	2		4	0		17	2	1	1	3	1	0	FALSE	FALSE	FALSE	FALSE	0
762	HUPE	31	2	2	RJ	2	1	2	1	2		2	0		17	2		1	3	1	0	FALSE	FALSE	TRUE	FALSE	1
763	HUPE	28	2	1	RJ	2	1	2	1	1		1	0		17	2	1	2	1	1	0	FALSE	FALSE	FALSE	FALSE	0
764	HUPE	33	2	2	RJ	1	1	2	1	2		2	0		17	2	1	1	1	1	0	FALSE	FALSE	TRUE	FALSE	1
765	HUPE	29	2	1	RJ	3	2	2	2	1		0	0		22	2	1	1	3	1	0	FALSE	FALSE	FALSE	FALSE	0
766	HUPE	41	2	2	RJ	1	1	1	2	2		3	1	1	17	2	1	1	3	2	0	FALSE	FALSE	FALSE	FALSE	0
767	HUPE	26	2	2	RJ	1	1	2	1	2		1	1	1	15	1	1	2	3	2	0	FALSE	FALSE	FALSE	FALSE	0
768	MESQUITA	17	1	2	RJ	1	1	1	1	1		0	0		14	1	1	2	3	2	0	FALSE	FALSE	FALSE	FALSE	0
769	MESQUITA	18	1	1	RJ	3	2	2	1	1		0	0		15	1	1	1	3	1	0	FALSE	FALSE	FALSE	FALSE	0
770	MESQUITA	25	2	2	RJ	1	1	1	1	1		1	0		15	1	1	2	3	1	0	FALSE	FALSE	FALSE	FALSE	0
771	MESQUITA	27	2	1	RJ	3	2	2	1	1		0	0		18	2	1	1	3	1	0	FALSE	FALSE	FALSE	FALSE	0
772	MESQUITA	25	2	2	RJ	6	2		1	1		1	0		24	2	1	1	2	1	0	FALSE	FALSE	FALSE	FALSE	0
773	MESQUITA	18	1	1	RJ	2	1	1	1	1		0	1	1	17	2	1	1	3	2	0	FALSE	FALSE	FALSE	FALSE	0
774	MESQUITA	22	1	1	RJ	2	1	1	1	1		1	0		15	1	1	1	3	1	0	FALSE	FALSE	FALSE	FALSE	0
775	MESQUITA	22	1	1	RJ	2	1	2	1	1		0	0		13	1	1	2	3	2	0	FALSE	FALSE	FALSE	FALSE	0
776	MESQUITA	18	1	2	RJ	1	1	1	1	2		2	1	1	12	1	1	2	3	1	0	FALSE	FALSE	FALSE	FALSE	0
777	MESQUITA	22	1	2	RJ	2	1	1	1	1		1	0		14	1	1	2	3	2	0	FALSE	FALSE	FALSE	FALSE	0
778	MESQUITA	19	1	2	RJ	2	1	1	1	1		0	0		16	2	1	2	3	2	0	FALSE	FALSE	FALSE	FALSE	0
779	MESQUITA	21	1	2	RJ	2	1	2	1	2		0	1	4	12	1	1	2	3	2	0	FALSE	FALSE	FALSE	FALSE	0
780	MESQUITA	18	1	2	RJ	1	1	2	2	1		0	0		16	2	1	1	3	1	0	FALSE	FALSE	FALSE	FALSE	0
781	MESQUITA	24	1	1	RJ	1	1	1	1	2		2	0		16	2	1	1	3	2	0	FALSE	FALSE	FALSE	FALSE	0
782	MESQUITA	29	2	1	BAHIA	2	1	2	1	1		1	0		17	2	1	1	3	2	0	FALSE	FALSE	FALSE	FALSE	0
783	MESQUITA	20	1	2	RJ	1	1	1	1	1		1	0		16	2	1	1	3	2	0	FALSE	FALSE	FALSE	FALSE	0
784	MESQUITA	17	1	2	RJ	2	1	2	1	1		0	0		17	2	1	1	3	1	0	FALSE	FALSE	FALSE	FALSE	0
785	MESQUITA	20	1	2	RJ	2	1	1	2	1		0	0		14	1	1	2	3	1	0	FALSE	FALSE	FALSE	FALSE	0
786	MESQUITA	16	1	2	RJ	1	1	1	1	1		0	0		15	1	1	1	3	1	0	FALSE	FALSE	FALSE	FALSE	0
787	MESQUITA	26	2	1	RJ	1	1	2	1	1		1	0		18	2	1	1	3	2	0	FALSE	FALSE	FALSE	FALSE	0
788	MESQUITA	17	1	2	RJ	1	1	2	2	1		1	0		13	1	1	1	3	1	0	FALSE	FALSE	FALSE	FALSE	0
789	MESQUITA	27	2	1	RJ	1	1	2	1	1		0	0		21	2	1	1	3	1	0	FALSE	FALSE	FALSE	FALSE	0
790	MESQUITA	22	1	1	RJ	2	1	2	1	1		0	0		16	2	1	1	1	1	0	FALSE	FALSE	FALSE	TRUE	1
791	MESQUITA	29	2	2	RJ	2	1	2	1	2		1	1	2	15	1	1	2	3	1	0	FALSE	FALSE	FALSE	FALSE	0
792	MESQUITA	20	1	1	SAO PAULO	2	1	2	1	1		0	0		17	2	1	1	1	1	0	FALSE	FALSE	FALSE	FALSE	0
793	MESQUITA	27	2	2	RJ	1	1	2	2	2		2	0		13	1	2	2	3	2	0	FALSE	FALSE	FALSE	FALSE	0
794	MESQUITA	18	1	2	RJ	1	1	1	2	2		2	0		14	1	1	2	3	2	0	FALSE	FALSE	FALSE	FALSE	0
795	MESQUITA	35	2	1	RJ	1	1	1	1	1		1	0		22	2	1	1	1	1	0	FALSE	FALSE	FALSE	FALSE	0
796	MESQUITA	23	1	2	RJ	3	2	2	1	1		0	0		20	2	1	1	3	1	0	FALSE	FALSE	FALSE	FALSE	0
797	MESQUITA	33	2	2	RJ	2	1	2	1	1		1	0		15	1	1		1	1	0	FALSE	FALSE	FALSE	FALSE	0
798	MESQUITA	40	2	2	RJ	1	1	2	1	2		2	0		21	2	1	1	3	2	0	FALSE	FALSE	FALSE	FALSE	0
799	MESQUITA	29	2	2	RJ	1	1	1	1	2		3	0		14	1	1		3	2	0	FALSE	FALSE	FALSE	FALSE	0
800	MESQUITA	19	1	2	RJ	1	1	2	2	1		1	0		15	1	1		2	1	0	FALSE	FALSE	FALSE	FALSE	0
801	MESQUITA	21	1	2	RJ	2	1	2	1	1		1	0		14	1	1	2	3	1	0	FALSE	FALSE	FALSE	FALSE	0
802	MESQUITA	23	1	1	RJ	1	1	2	2	1		0	0		15	1	1	2	3	2	0	FALSE	FALSE	FALSE	FALSE	0
803	MESQUITA	26	2	2	RJ	1	1	1	1	1		0	0		17	2	1	1	3	1	0	FALSE	FALSE	FALSE	FALSE	0
804	MESQUITA	34	2	1	RJ	1	1	1	1	2		3	0		15	1	1	1	3	2	0	FALSE	FALSE	FALSE	FALSE	0
805	MESQUITA	21	1	2	RJ	1	1	1	1	1		0	0		16	2	1	2	3	2	0	FALSE	FALSE	FALSE	TRUE	1
806	MESQUITA	29	2	2	RJ	2	1	2	1	1		1	0		15	1	1	1	3	2	0	FALSE	FALSE	FALSE	FALSE	0
807	MESQUITA	22	1	1	RJ	1	1	2	1	1		0	0		18	2	3	2	3	2	0	FALSE	FALSE	FALSE	FALSE	0
808	MESQUITA	18	1	2	RJ	1	1	2	1	1		0	0		18	2	1	1	3	2	0	FALSE	FALSE	FALSE	FALSE	0
809	MESQUITA	23	1	2	RJ	1	1	2	1	1		1	0		16	2	1	1	3	1	0	FALSE	FALSE	FALSE	FALSE	0
810	MESQUITA	37	2	2	RJ	3	2	2	1	2		1	1	1	16	2	1	1	3	2	0	FALSE	FALSE	FALSE	FALSE	0
811	MESQUITA	19	1	2	RJ	1	1	1	1	1		0	0		16	2	1	2	3	1	0	FALSE	FALSE	FALSE	FALSE	0
812	MESQUITA	17	1	2	RJ	3	2	1	1	1		1	0		13	1	1	1	3	2	0	FALSE	FALSE	FALSE	FALSE	0
813	MESQUITA	17	1	1	RJ	1	1	2	1	1		0	0		14	1	1		3	2	0	FALSE	FALSE	FALSE	FALSE	0
814	MESQUITA	24	1	2	RJ	2	1	2	2						16	2	1	1	3	1	0	FALSE	FALSE	FALSE	FALSE	0
815	MESQUITA	25	2	2	RJ	1	1	2	1	2		2	1	1	14	1	1	2	3	2	0	FALSE	FALSE	FALSE	FALSE	0
816	MESQUITA	26	2	2	RJ	1	1	1	1	1		1	0		18	2	1		3	1	0	FALSE	FALSE	FALSE	FALSE	0
817	MESQUITA	28	2	2	RJ	1	1	2	2	2		1	1	1	18	2	1	1	3	1	0	FALSE	FALSE	FALSE	FALSE	0
818	MESQUITA	30	2	2	RJ	1	1	2	2	2		2	0		18	2	1	1	3	1	0	FALSE	FALSE	FALSE	FALSE	0
819	MESQUITA	20	1	1	RJ	1	1	1	2	2		2	0		14	1	1	1	3	1	0	FALSE	FALSE	FALSE	FALSE	0
820	MESQUITA	33	2	2	RJ	1	1	1	1	2		2	0		16	2	1	1	3	2	0	FALSE	FALSE	FALSE	FALSE	0
821	MESQUITA	17	1	2	RJ	2	1	2	2	1		0	0		15	1	1	1	3	1	0	FALSE	FALSE	FALSE	FALSE	0
822	MESQUITA	24	1	2	RJ	2	1	2	2	1		0	0		17	2	1	2	3	1	0	FALSE	FALSE	FALSE	FALSE	0
823	MESQUITA	26	2	2	RJ	2	1	2	1	2		0	1	2	19	2	1	1	3	1	0	FALSE	FALSE	FALSE	FALSE	0
824	MESQUITA	18	1	2	RJ	1	1	1	1	1		0	0		15	1	1	1	3	2	0	FALSE	FALSE	FALSE	FALSE	0
825	MESQUITA	24	1	2	RJ	1	1	1	1	1		1	0		15	1	1	1	2	1	0	FALSE	FALSE	FALSE	FALSE	0
826	MESQUITA	27	2	2	RJ	1	1	2	1	1		0	0		18	2	1	1	3	1	0	FALSE	FALSE	FALSE	FALSE	0
827	MESQUITA	28	2	2	RJ	6	2	2	1	1		0	0		16	2	1	1	3	1	0	FALSE	FALSE	FALSE	FALSE	0
828	MESQUITA	23	1	2	RJ	2	1	1	1	2		2	0		18	2	1	1	3	1	0	FALSE	FALSE	FALSE	FALSE	0
829	MESQUITA	30	2	2	RJ	6	2	2	1	1		1	0		18	2	1	1	3	1	0	FALSE	FALSE	FALSE	FALSE	0
830	MESQUITA	18	1	2	RJ	1	1	1	1	1		1	0		14	1	1	1	3	1	0	FALSE	FALSE	FALSE	FALSE	0
831	MESQUITA	21	1	2	RJ	1	1	2	1	1		0	0		16	2	1	2	3	2	0	FALSE	FALSE	FALSE	FALSE	0
832	MESQUITA	31	2	1	RJ	1	1	2	1	2		2	0		18	2	1	2	3	2	0	FALSE	FALSE	FALSE	FALSE	0
833	MESQUITA	28	2	2	RJ	2	1	2	2	2		3	0		18	2	1	2	3	2	0	FALSE	FALSE	FALSE	FALSE	0
834	MESQUITA	30	2	2	RJ	1	1	1	1	2		2	1	0	15	1	1	2	3	1	0	FALSE	FALSE	FALSE	FALSE	0
835	MESQUITA	13	1	2	RJ	1	1	1	2	1		0	0		12	1	1	1	3	1	0	FALSE	FALSE	FALSE	FALSE	0
836	MESQUITA	39	2	2	RJ	1	1	2	1	2		2	0		18	2	1	2	3	2	0	FALSE	FALSE	FALSE	FALSE	0
837	MESQUITA	24	1	2	RJ	2	1	2	1	1		1	0		15	1	1	1	3	1	0	FALSE	FALSE	FALSE	FALSE	0
838	MESQUITA	36	2	1	RJ	1	1	2	1	1		0	0		19	2	1	2	3	2	0	FALSE	FALSE	FALSE	FALSE	0
839	MESQUITA	29	2	2	RJ	1	1	2	1	1		1	0		16	2	1	1	3	2	0	FALSE	FALSE	FALSE	FALSE	0
840	MESQUITA	28	2	2	RJ	1	1	2	1	2		3	0		17	2	1	1	3	2	0	FALSE	FALSE	FALSE	FALSE	0
841	MESQUITA	24	1	2	RJ	1	1	2	1	1		1	0		14	1	1	1	3	2	0	FALSE	FALSE	FALSE	FALSE	0
842	MESQUITA	16	1	2	RJ	2	1	1	2	1		0	0		14	1	1	1	1	1	0	FALSE	FALSE	FALSE	FALSE	0
843	MESQUITA	31	2	2	RJ	1	1	1	1	2		3	0		15	1	1	1	3	2	0	FALSE	FALSE	FALSE	FALSE	0
844	MESQUITA	20	1	2	MARANHAO	1	1	2	1	1		0	0		16	2	1	1	2	1	0	FALSE	FALSE	FALSE	FALSE	0
845	MESQUITA	26	2	1	PERNAMBUCO	2	1	2	2	1		0	0		18	2	1	1	3	2	0	FALSE	FALSE	FALSE	FALSE	0
846	MESQUITA	18	1	2	RJ	1	1	2	1	1		0	0		12	1	1	2	3	1	0	FALSE	FALSE	FALSE	FALSE	0
847	MESQUITA	21	1	2	RJ	2	1	1	1						11	1	1		3	2	0	FALSE	FALSE	FALSE	FALSE	0
848	MESQUITA	25	2	2	RJ	6	2	2	2	1		0	0		16	2	2	1	3	2	0	FALSE	FALSE	FALSE	FALSE	0
849	MESQUITA	23	1	1	RJ	2	1	2	1	1		0	0		18	2	1	1	3	2	0	FALSE	FALSE	FALSE	FALSE	0
850	MESQUITA	18	1	1	RJ	2	1	1	1	1		0	1	1	15	1	1	1	3	1	0	FALSE	FALSE	FALSE	FALSE	0
851	MESQUITA	23	1	1	MINAS GERAIS	1	1	2	1	1		1	0		16	2	1	1	3	2	0	FALSE	FALSE	FALSE	FALSE	0
852	MESQUITA	32	2	2	RJ	1	1	1	1	2		2	1	1	18	2	1	2	3	1	0	FALSE	FALSE	FALSE	FALSE	0
853	MESQUITA	30	2	1	RJ	2	1	2	1	1		1	0		18	2	1	1	3	2	0	FALSE	FALSE	FALSE	FALSE	0
854	MESQUITA	18	1	2	RJ	1	1	2	1	1		0	0		16	2	1	2	3	1	0	FALSE	FALSE	FALSE	FALSE	0
855	MESQUITA	19	1	2	RJ	1	1	1	1	1		1	0		15	1	2		3	2	0	FALSE	FALSE	FALSE	FALSE	0
856	MESQUITA	15	1	1	RJ	1	1	1	1	1		0	0		14	1	4	2	2	1	0	FALSE	FALSE	FALSE	FALSE	0
857	MESQUITA	18	1	1	RJ	1	1	2	2	1		0	0		15	1	1	1	3	1	0	FALSE	FALSE	FALSE	FALSE	0
858	MESQUITA	28	2	2	RJ	6	2	2	1	2		2	0		17	2	1	1	3	2	0	FALSE	FALSE	FALSE	FALSE	0
859	MESQUITA	15	1	1	RJ	4	2	1	1	1		0	0		13	1	1	1	3	1	0	FALSE	FALSE	FALSE	FALSE	0
860	MESQUITA	14	1	2	RJ	1	1	1	2	1		0	0		14	1	1	1	3	1	0	FALSE	FALSE	FALSE	FALSE	0
861	MESQUITA	17	1	2	RJ	2	1	2	1	1		0	0		14	1	1	1	3	1	0	FALSE	FALSE	FALSE	FALSE	0
862	MESQUITA	17	1	2	RJ	2	1	2	2	1		0	0		15	1	1	1	3	1	0	FALSE	FALSE	FALSE	FALSE	0
863	MESQUITA	18	1	2	PARAIBA	1	1	2	1	1		0	0		15	1	1	1	3	1	0	FALSE	FALSE	FALSE	FALSE	0
864	MESQUITA	24	1	2	RJ	1	1	2	1	1		1	0		17	2	4	2	2	1	0	FALSE	FALSE	FALSE	FALSE	0
865	MESQUITA	21	1	1	RJ	1	1	2	1	1		0	0		18	2	1	1	3	1	0	FALSE	FALSE	FALSE	TRUE	1
866	MESQUITA	27	2	1	RJ	2	1	2	1	1		0	0		19	2	1	1	3	1	0	FALSE	FALSE	FALSE	FALSE	0
867	MESQUITA	19	1	2	RJ	2	1	1	1	1		0	1	1	14	1	1	1	3	1	0	FALSE	FALSE	FALSE	FALSE	0
868	MESQUITA	18	1	1	RJ	1	1	1	2	1		1	0		16	2	1	1	3	2	0	FALSE	FALSE	FALSE	FALSE	0
869	MESQUITA	19	1	2	RJ	3	2	2	2	1		0	0		17	2	1	1	3	1	0	FALSE	FALSE	FALSE	FALSE	0
870	MESQUITA	18	1	2	RJ	1	1	1	2	1		0	1	1	14	1	1	2	3	1	0	FALSE	FALSE	FALSE	FALSE	0
871	MESQUITA	17	1	2	RJ	1	1	2	1	1		0	0		16	2	1	1	3	1	0	FALSE	FALSE	FALSE	FALSE	0
872	MESQUITA	25	2	1	RJ	1	1	2	1	1		0	0		15	1	1	1	3	1	0	FALSE	FALSE	FALSE	FALSE	0
873	MESQUITA	22	1	1	RJ	6	2	2	2	1		0	0		15	1	3		3	1	0	FALSE	FALSE	FALSE	FALSE	0
874	MESQUITA	17	1	1	RJ	1	1	2	2	1		0	0		16	2	3	2	3	1	0	FALSE	FALSE	FALSE	TRUE	1
875	MESQUITA	20	1	2	RJ	2	1	2	2	1		0	0		15	1	1	1	3	2	0	FALSE	FALSE	FALSE	FALSE	0
876	MESQUITA	33	2	2	RJ	2	1	2	1	2		3	1	1	16	2	1	2	3	2	0	FALSE	TRUE	FALSE	FALSE	0
877	MESQUITA	26	2	2	RJ	2	1	2	1	1		1	0		13	1	1	1	3	1	0	FALSE	FALSE	FALSE	FALSE	0
878	MESQUITA	20	1	2	RJ	5	2	1	1	1		0	0		15	1	1	2	3	2	0	FALSE	FALSE	FALSE	FALSE	0
879	MESQUITA	25	2	2	RJ	1	1	1	1	1		1	0		18	2	2	1	3	1	0	FALSE	FALSE	FALSE	FALSE	0
880	MESQUITA	40	2	2	PARAIBA	2	1	2	1	2		2	0		25	2	1	1	1	1	0	FALSE	FALSE	FALSE	FALSE	0
881	MESQUITA	18	1	1	RJ	2	1	2	1	1		0	0		14	1	1	1	3	2	0	FALSE	FALSE	FALSE	FALSE	0
882	MESQUITA	21	1	2	RJ	1	1	2	1	1		0	0		17	2	1	2	3	2	0	FALSE	FALSE	FALSE	FALSE	0
883	MESQUITA	31	2	2	RJ	1	1	1	2	1		1	0		17	2	1	1	3	1	0	FALSE	FALSE	FALSE	FALSE	0
884	MESQUITA	17	1	2	RJ	3	2	2	2	1		0	0		14	1	1	1	3	2	0	FALSE	FALSE	FALSE	FALSE	0
885	MESQUITA	20	1	2	RJ	1	1	1	2	2		2	0		12	1	1	2	3	2	0	FALSE	FALSE	FALSE	FALSE	0
886	MESQUITA	26	2	2	RJ	1	1	2	1	1		0	0		19	2	1	1	3	2	0	FALSE	FALSE	FALSE	FALSE	0
887	MESQUITA	29	2	1	RJ	1	1	1	1	2		4	1	1	16	2	1	1	3	1	0	FALSE	FALSE	FALSE	FALSE	0
888	MESQUITA	30	2	2	RJ	2	1	1	1	1		1	0		16	2	1	2	3	2	0	FALSE	TRUE	FALSE	FALSE	0
889	MESQUITA	34	2	2	CHINA	2	1	2	1	2		2	0		25	2					0	FALSE	FALSE	FALSE	FALSE	0
890	MESQUITA	25	2	2	RJ	2	1	1	1	2		2	0		13	1	1		3	2	0	FALSE	FALSE	FALSE	FALSE	0
891	MESQUITA	28	2	2	RJ	1	1	2	1	1		1	0		18	2	1	1	3	2	0	FALSE	FALSE	FALSE	FALSE	0
892	MESQUITA	26	2	2	RJ	2	1	2	1	2		2	0		17	2	1	2	3	2	0	FALSE	FALSE	FALSE	FALSE	0
893	MESQUITA	18	1	1	RJ	1	1	1	2	1		1	0		14	1	1	1	3	2	0	FALSE	FALSE	FALSE	FALSE	0
894	MESQUITA	37	2	2	RJ	2	1	2	1	1		1	0		18	2	1	2	3	1	0	FALSE	FALSE	FALSE	FALSE	0
895	MESQUITA	16	1	1	RJ	2	1	1	2	1		0	0		13	1	1	1	3	1	0	FALSE	FALSE	FALSE	FALSE	0
896	MESQUITA	18	1	2	RJ	1	1	2	2			0	0		16	2	1	1	3	2	0	FALSE	FALSE	FALSE	FALSE	0
897	MESQUITA	18	1	2	RJ	2	1	2	1	1		0	0		17	2	1	1	3	1	0	FALSE	FALSE	FALSE	FALSE	0
898	MESQUITA	25	2	2	RJ	1	1	2	2	1		0	1	2	16	2	6		3	2	0	FALSE	FALSE	FALSE	FALSE	0
899	MESQUITA			2	RJ	5	2	1	1	1		0	0		14	1	1	1	2	1	0	FALSE	FALSE	FALSE	FALSE	0
900	MESQUITA	33	2	2	RJ	2	1	1	1	1		1	0		13	1	1	2	3	1	0	FALSE	FALSE	FALSE	FALSE	0
901	MESQUITA	24	1	1	RJ	1	1	2	1	1		1	0		18	2	1	1	3	2	0	FALSE	FALSE	FALSE	FALSE	0
902	MESQUITA	19	1	2	RJ	1	1	1	1	1		0	0		14	1	1	1	3	1	0	FALSE	FALSE	FALSE	FALSE	0
903	MESQUITA	18	1	2	RJ	1	1	2	1	1		1	0		14	1	1	1	3	1	0	FALSE	FALSE	FALSE	FALSE	0
904	MESQUITA	23	1	2	RJ	1	1	2	1						19	2	1	1	3	1	0	FALSE	FALSE	FALSE	FALSE	0
905	MESQUITA	32	2	2	RJ	2	1	2	1	1		0	0		13	1	1	1	3	1	0	FALSE	FALSE	FALSE	FALSE	0
906	MESQUITA	23	1	2	RJ	1	1	1	1	1		1	0		13	1	1	1	3	1	0	FALSE	FALSE	FALSE	FALSE	0
907	MESQUITA	35	2	2	RJ	1	1	1	1						15	1	1	1	3	2	0	FALSE	FALSE	FALSE	FALSE	0
908	MESQUITA	27	2	2	RJ	2	1	2	2						17	2	1	2	3	1	0	FALSE	FALSE	FALSE	FALSE	0
909	MESQUITA	27	2	2	RJ	1	1	1	1						15	1	1	2	3	2	0	FALSE	FALSE	FALSE	FALSE	0
910	MESQUITA	22	1	2	RJ	2	1	2	1						20	2	1	1	3	1	0	FALSE	FALSE	FALSE	FALSE	0
911	MESQUITA	22	1		RJ	1	1	1	1						13	1	1	2	3	1	0	FALSE	FALSE	FALSE	TRUE	1
912	MESQUITA	18	1	2	RJ	1	1	1	2						15	1	1	1	1	1	0	FALSE	FALSE	FALSE	FALSE	0
913	MESQUITA	19	1	2	RJ	2	1	2	1						16	2	1	1	3	2	0	FALSE	FALSE	FALSE	FALSE	0
914	MESQUITA	21	1	2	RJ	1	1	2	2						16	2	1	2	3	2	0	FALSE	FALSE	FALSE	FALSE	0
915	MESQUITA	18	1	1	RJ	2	1	2	2						17	2	1	1	3	1	0	FALSE	FALSE	FALSE	FALSE	0
916	MESQUITA	18	1	2	RJ	2	1	2	1						15	1	1	1	3	1	0	FALSE	FALSE	FALSE	FALSE	0
917	MESQUITA	27	2	1	CEARA	1	1	2	1						24	2	1	1	3	1	0	FALSE	FALSE	FALSE	FALSE	0
918	MESQUITA	32	2	1	RJ	2	1	2	1						23	2	1	1	3	2	0	FALSE	FALSE	FALSE	FALSE	0
919	MESQUITA	19	1	2	RJ	1	1	1	1						15	1	1	2	3	2	0	FALSE	FALSE	FALSE	FALSE	0
920	MESQUITA	23	1	2	MINAS GERAIS	2	1	2	1						15	1	1	2	3	1	0	FALSE	FALSE	FALSE	FALSE	0
921	MESQUITA	22	1	2	RJ	1	1	2	1						15	1	1	1	3	1	0	FALSE	FALSE	FALSE	FALSE	0
922	MESQUITA	18	1	2	RJ	1	1	2	1						15	1	1	1	3	2	0	FALSE	FALSE	FALSE	FALSE	0
923	MESQUITA	34	2	2	RJ	1	1	1	1						13	1	1	2	3	2	0	FALSE	FALSE	FALSE	FALSE	0
924	MESQUITA	24	1	2	RJ	1	1	2	1						17	2	1	1	3	1	0	FALSE	FALSE	FALSE	FALSE	0
925	MESQUITA	33	2	2	RJ	1	1	2	1						16	2	1	1	3	1	0	FALSE	FALSE	FALSE	FALSE	0
926	MESQUITA	20	1	1	RJ	2	1	2	1						15	1	1	1	3	2	0	FALSE	FALSE	FALSE	FALSE	0
927	MESQUITA	22	1	2	RJ	2	1	2	1						16	2	1	2	3	1	0	FALSE	FALSE	FALSE	FALSE	0
928	MESQUITA	25	2	2	MARANHÃO	3	2	2	1						20	2	1	2	3	1	0	FALSE	FALSE	FALSE	FALSE	0
929	MESQUITA	23	1	2	RJ			2	1						14	1	1	2	3	1	0	FALSE	FALSE	FALSE	TRUE	1
930	MESQUITA	25	2	2	RJ	1	1	2	1						15	1	1	2	3	2	0	FALSE	FALSE	FALSE	FALSE	0
931	MESQUITA	22	1	2	RJ	1	1	2	1						12	1	1	1	3	2	0	FALSE	FALSE	FALSE	FALSE	0
932	MESQUITA	20	1	1	RJ	2	1	2	1						17	2	1	1	3	2	0	FALSE	FALSE	FALSE	FALSE	0
933	MESQUITA	29	2	2	RJ	1	1	1	1	2		4	1	4	13	1	1	2	3	2	0	FALSE	FALSE	FALSE	FALSE	0
934	MESQUITA	24	1	2	RJ	1	1	1	1						16	2	1	1	3	2	0	FALSE	FALSE	FALSE	FALSE	0
935	MESQUITA	25	2	1	RJ	1	1	2	1						17	2	1	2	3	2	0	FALSE	FALSE	FALSE	FALSE	0
936	MESQUITA	21	1	2	RJ	2	1	1	1						15	1	1	2	3	2	0	FALSE	FALSE	FALSE	FALSE	0
937	MESQUITA	30	2	2	RJ	1	1	2	1						17	2	1	1	3	2	0	FALSE	FALSE	FALSE	FALSE	0
938	MESQUITA	21	1	1	RJ	1	1	1	2						18	2	2	2	3	2	0	FALSE	FALSE	FALSE	FALSE	0
939	MESQUITA	20	1	2	RJ	1	1	1	2						16	2	1	1	3	2	0	FALSE	FALSE	FALSE	FALSE	0
940	MESQUITA	17	1	2	RJ	1	1	1	1						15	1	1	1	3	2	0	FALSE	FALSE	FALSE	FALSE	0
941	MESQUITA	19	1	2	RJ	2	1	2	1						15	1	1	1	3	1	0	FALSE	FALSE	FALSE	FALSE	0
942	MESQUITA	20	1	2	PARAIBA	1	1	2	1						16	2	1	1	3	1	0	FALSE	FALSE	FALSE	FALSE	0
943	MESQUITA	21	1	1	RJ	3	2	2	2						14	1	1	2	3	1	0	FALSE	FALSE	FALSE	FALSE	0
944	MESQUITA	24	1	2	RJ	1	1	2	1						15	1	1	2	3	2	0	FALSE	FALSE	FALSE	FALSE	0
945	MESQUITA	20	1	1	RJ	1	1	2	2						18	2	1	1	3	1	0	FALSE	FALSE	FALSE	FALSE	0
946	MESQUITA	21	1	2	RJ	1	1	2	1						13	1	1	1	3	2	0	FALSE	FALSE	FALSE	FALSE	0
947	MESQUITA	22	1	2	RJ	1	1	2	1						16	2	1	2	3	2	0	FALSE	FALSE	FALSE	FALSE	0
948	MESQUITA	25	2	2	RJ	3	2	2	1						15	1	1	2	3	1	0	FALSE	FALSE	FALSE	FALSE	0
949	MESQUITA	26	2	1	RJ	1	1	1	1						14	1	1	2	3	2	0	FALSE	FALSE	FALSE	FALSE	0
950	MESQUITA	22	1	2	RJ	1	1	1	2						14	1	2		3	1	0	FALSE	FALSE	FALSE	FALSE	0
951	MESQUITA	21	1	1	RJ	1	1	2	2						15	1	1	1	3	1	0	FALSE	FALSE	FALSE	FALSE	0
952	MESQUITA	22	1	1	RJ	1	1	2	1						17	2	1	2	3	1	0	FALSE	FALSE	FALSE	FALSE	0
953	MESQUITA	26	2	1	RJ	1	1	2	1						20	2	1	1	3	2	0	FALSE	FALSE	FALSE	FALSE	0
954	MESQUITA	20	1	2	RJ	1	1	2	1						17	2	1	1	3	2	0	FALSE	FALSE	FALSE	FALSE	0
955	MESQUITA	21	1	1	RJ	1	1	2	1						14	1	1	2	3	2	0	FALSE	FALSE	FALSE	FALSE	0
956	MESQUITA	28	2	2	RJ	2	1	1	1						18	2	1	1	3	2	0	FALSE	FALSE	FALSE	FALSE	0
957	MESQUITA	17	1	2	RJ	1	1	1	2						15	1	1	1	3	1	0	FALSE	FALSE	FALSE	FALSE	0
958	MESQUITA	27	2	2	RJ	2	1	1	1						13	1	1	2	3	2	0	FALSE	FALSE	FALSE	FALSE	0
959	MESQUITA	28	2	2	RJ	2	1	2	1						24	2	1	1	3	2	0	FALSE	FALSE	FALSE	FALSE	0
960	MESQUITA	17	1	1	RJ	1	1	1	1						13	1	1	1	3	1	0	FALSE	FALSE	FALSE	FALSE	0
961	MESQUITA	22	1	1	RJ	1	1	2	2						14	1	1	1	3	1	0	FALSE	FALSE	FALSE	FALSE	0
962	MESQUITA	18	1	2	RJ	1	1	2	1						16	2	1	1	3	2	0	FALSE	FALSE	FALSE	FALSE	0
963	MESQUITA	23	1	2	RJ	1	1	1	1						17	2	1	1	3	2	0	FALSE	FALSE	FALSE	FALSE	0
964	MESQUITA	31	2	2	RJ	1	1	1	1						14	1	1	1	3	1	0	FALSE	FALSE	FALSE	FALSE	0
965	MESQUITA	22	1	2	RJ	1	1	1	1						17	2	1	1	3	1	0	FALSE	FALSE	FALSE	FALSE	0
966	MESQUITA	17	1	2	RJ	3	2	1	1						12	1	1		3	2	0	FALSE	FALSE	FALSE	FALSE	0
967	MESQUITA	28	2	1	RJ	2	1	2	1						18	2	1	1	1	1	0	FALSE	FALSE	FALSE	FALSE	0
968	MESQUITA	20	1	2	RJ	1	1	1	2						15	1	1	2	3	1	0	FALSE	FALSE	FALSE	FALSE	0
969	MESQUITA	18	1	2	RJ	1	1	1	2						16	2	1	1	3	1	0	FALSE	FALSE	FALSE	FALSE	0
970	MESQUITA	22	1	1	RJ	1	1	2	2						18	2	2	2	3	1	0	FALSE	FALSE	FALSE	FALSE	0
971	MESQUITA	26	2	2	ESPIRITO SANTO	2	1	1	1						17	2	1	2	3	2	0	FALSE	FALSE	FALSE	FALSE	0
972	MESQUITA	21	1	2	RJ	3	2	2	2						14	1	2	2	3	1	0	FALSE	FALSE	FALSE	FALSE	0
973	MESQUITA	21	1	2	RJ	1	1	2	1						15	1	1	1	3	2	0	FALSE	FALSE	FALSE	FALSE	0
974	MESQUITA	31	2	2	RJ	1	1	2	1						17	2	1	2	1	1	0	FALSE	FALSE	FALSE	FALSE	0
975	MESQUITA	42	2	2	CEARA	2	1	1	1						16	2	1	1	3	2	0	FALSE	FALSE	FALSE	FALSE	0
976	MESQUITA	23	1	2	RJ	4	2	2	1						18	2	1	1	3	1	0	FALSE	FALSE	FALSE	FALSE	0
977	MESQUITA	17	1	2	RJ	2	1	2	2						14	1	1	2	3	1	0	FALSE	FALSE	FALSE	FALSE	0
978	MESQUITA	29	2	2	RJ	1	1	2	1						14	1	1	2	3	2	0	FALSE	FALSE	FALSE	FALSE	0
979	MESQUITA	27	2	2	RJ	1	1	2	1						21	2	1	1	3	2	0	FALSE	FALSE	FALSE	FALSE	0
980	MESQUITA	34	2	2	RJ	3	2	2	1						26	2	1	1	2	1	0	FALSE	FALSE	FALSE	FALSE	0
981	MESQUITA	28	2	1	RJ	1	1	1	2						16	2	1	1	3	2	0	FALSE	FALSE	FALSE	FALSE	0
982	MESQUITA	22	1	2	RJ	1	1	2	1						18	2	1	1	3	1	0	FALSE	FALSE	FALSE	FALSE	0
983	MESQUITA	17	1	1	RJ	1	1	1	2						13	1	1	1	3	2	0	FALSE	FALSE	FALSE	FALSE	0
984	MESQUITA	20	1	1	RJ	1	1	2	1						14	1	1	2	3	2	0	FALSE	FALSE	FALSE	FALSE	0
985	MESQUITA	21	1	2	RJ	1	1	2	1						18	2	1	1	3	2	0	FALSE	FALSE	FALSE	TRUE	1
986	MESQUITA	32	2	2	SAO PAULO	1	1	2	1						18	2	1	1	3	2	0	FALSE	FALSE	FALSE	FALSE	0
987	MESQUITA	21	1	2	RJ	2	1	2	1						17	2	1	1	1	1	0	FALSE	FALSE	FALSE	FALSE	0
988	MESQUITA	16	1	2	RJ	1	1	1	2						13	1	2	1	3	1	0	FALSE	FALSE	FALSE	FALSE	0
989	MESQUITA	27	2	2	RJ	2	1	1	2						18	2	1	1	3	2	0	FALSE	FALSE	FALSE	FALSE	0
990	MESQUITA	22	1	2	RJ	2	1	2	1						16	2	1	1	3	1	0	FALSE	FALSE	FALSE	FALSE	0
991	MESQUITA	26	2	2	RJ	3	2	2	1						18	2	1	1	3	2	0	FALSE	FALSE	FALSE	FALSE	0
992	MESQUITA	23	1	2	RJ	2	1	2	1						16	2	1	1	1	1	0	FALSE	FALSE	FALSE	FALSE	0
993	MESQUITA	24	1	1	RJ	2	1	2	1						14	1	1	1	3	2	0	FALSE	FALSE	FALSE	FALSE	0
994	MESQUITA	17	1	1	RJ	1	1	1	2						15	1	1	1	3	2	0	FALSE	FALSE	FALSE	FALSE	0
995	MESQUITA	21	1	2	RJ	2	1	1	2						15	1	2	2	3	1	0	FALSE	FALSE	FALSE	FALSE	0
996	MESQUITA	19	1	2	RJ	6	2	2	2						14	1	2	2	3	1	0	FALSE	FALSE	FALSE	FALSE	0
997	MESQUITA	36	2	2	RJ	2	1	2	1						20	2	1	1	3	1	0	FALSE	FALSE	FALSE	FALSE	0
998	MESQUITA	18	1	2	RJ	1	1	2	2						15	1	3	2	3	1	0	FALSE	FALSE	FALSE	FALSE	0
999	MESQUITA	22	1	2	RJ	1	1	1	1						16	2	1	1	3	1	0	FALSE	FALSE	FALSE	FALSE	0
1000	MESQUITA	18	1	1	RJ	2	1	2	1						17	2	1	1	3	2	0	FALSE	FALSE	FALSE	FALSE	0
1001	MESQUITA	19	1	1	RJ	2	1	2	1						16	2	1	1	3	1	0	FALSE	FALSE	FALSE	FALSE	0
1002	HUPE	28	2	2	ALAGOAS	1	1	1	1	2		3	1	1	14	1	1	1	1	2	0	FALSE	FALSE	FALSE	FALSE	0
1003	HUPE	24	1	2	RJ	1	1	1	2	2		3	0		12	1	2	1	3	2	0	FALSE	FALSE	FALSE	TRUE	1
1004	HUPE	38	2	2	PARAIBA	2	1	2	1	2		3	0		19	2	1	2	3	2	0	FALSE	FALSE	FALSE	FALSE	0
1005	HUPE	21	1	1	RJ	3	2	2	2	1		0	0		16	2	1	1	3	1	0	FALSE	FALSE	FALSE	FALSE	0
1006	HUPE	24	1	2	RJ	3	2	2	2	1		0	0		15	1	1	1	3	2	0	FALSE	FALSE	FALSE	FALSE	0
1007	HUPE	37	2	2	RJ	2	1	2	1	1		1	0		18	2	1	1	3	2	0	FALSE	FALSE	FALSE	FALSE	0
1008	HUPE	28	2	2	RJ	2	1	1	1	2		3	0		13	1	1	2	3	2	0	FALSE	FALSE	TRUE	FALSE	1
1009	HUPE	17	1	1	RJ	2	1	2	2	1		0	0		15	1	1	1	3	1	0	FALSE	FALSE	FALSE	FALSE	0
1010	HUPE	35	2	2	RJ	3	2	2	1	2		2	1	1	15	1	1	1	3	1	0	FALSE	FALSE	FALSE	FALSE	0
1011	HUPE	32	2	1	RJ	2	1	2	1	1		0	0		20	2	1	1	3	1	0	FALSE	FALSE	FALSE	FALSE	0
1012	HUPE	38	2	2	RJ	1	1	1	2	2		5	0		17	2	1	1	3	2	0	FALSE	FALSE	FALSE	FALSE	0
1013	HUPE	38	2	2	SERGIPE	1	1	1	1	1		1	0		16	2	1	1	3	2	0	FALSE	FALSE	FALSE	FALSE	0
1014	HUPE	36	2	1	R	4	2	2	1	2		2	1	1	18	2	1	1	3	1	0	FALSE	FALSE	FALSE	FALSE	0
1015	HUPE	25	2	2	RJ	1	1	2	2	2		0	1	2	16	2	1	2	3	2	0	FALSE	FALSE	FALSE	FALSE	0
1016	HUPE	37	2	2	BAHIA	2	1	1	1	2		2	1	1	13	1	1	1	3	1	0	FALSE	FALSE	FALSE	FALSE	0
1017	HUPE	24	1	2	RJ	2	1	2	2	1		0	0		14	1	1	2	3	1	0	FALSE	FALSE	FALSE	FALSE	0
1018	HUPE	28	2	2	RJ	3	2	2	1	1		0	0		17	2	1	2	3	1	0	FALSE	FALSE	FALSE	FALSE	0
1019	HUPE	39	2	2	RJ	5	2	2	1						16	2	1		3	2	0	FALSE	FALSE	FALSE	FALSE	0
1020	HUPE	42	2	2	RJ	6	2	2	1	2		0	1	2	26	2	1	1	3	2	0	FALSE	FALSE	FALSE	FALSE	0
1021	HUPE	34	2	1	RJ	5	2	2	1	1		1	0		18	2	1	1	3	1	0	FALSE	FALSE	FALSE	FALSE	0
1022	HUPE	31	2	2	RJ	1	1	2	2	2		8	0		15	1	1	1	3	1	0	FALSE	FALSE	FALSE	FALSE	0
1023	HUPE	34	2	1	RJ	1	1	2	1	2		2	0		20	2	1	1	3	1	0	FALSE	FALSE	FALSE	FALSE	0
1024	HUPE	34	2	2	RJ	4	2	2	1	1		0	0		19	2	1	2	1	1	0	FALSE	FALSE	FALSE	FALSE	0
1025	HUPE	31	2	2	RJ	1	1	2	1	2		1	1	1	17	2	1	1	3	2	0	FALSE	FALSE	FALSE	FALSE	0
1026	HUPE	30	2	1	RJ	3	2	2	1	2		2	1	1	15	1	1	2	3	1	0	FALSE	FALSE	FALSE	FALSE	0
1027	HUPE	20	1	2	RJ	1	1	2	2	1		0	0		13	1	1	1	3	2	0	FALSE	FALSE	FALSE	FALSE	0
1028	HUPE	37	2	2	RJ	2	1	2	1	2		2	0		15	1	1	1	3	2	0	FALSE	FALSE	FALSE	FALSE	0
1029	HUPE	26	2	1	RJ	4	2	2	2	1		0	0		22	2	1	1	1	1	0	FALSE	FALSE	FALSE	FALSE	0
1030	HUPE	34	2	2	RJ	2	1	2	1	1		0	0		14	1	1		3	2	0	FALSE	FALSE	FALSE	FALSE	0
1031	HUPE	27	2	1	RJ	2	1	2	1	1		1	0		14	1	1	2	3	2	0	FALSE	FALSE	FALSE	FALSE	0
1032	HUPE	38	2	2	RJ	2	1	1	1	1		0	0		17	2	1	2	3	1	0	FALSE	FALSE	FALSE	FALSE	0
1033	HUPE	24	1	2	CEARA	2	1	1	2	1		1	0		17	2	3	1	2	2	0	FALSE	FALSE	FALSE	FALSE	0
1034	HUPE	36	2	2	RJ	2	1	1	1	1		1	0		17	2	1	1	3	1	0	FALSE	FALSE	FALSE	FALSE	0
1035	HUPE	38	2	2	RJ	2	1	1	1	1		0	0		18	2	1	1	3	1	0	FALSE	FALSE	FALSE	FALSE	0
1036	HUPE	21	1	1	RJ	2	1	1	1	1		1	0		15	1	1	1	3	1	0	FALSE	FALSE	FALSE	FALSE	0
1037	HUPE	31	2	2	RJ	2	1	2	1	2		0	1	2	16	2	1	2	3	2	0	FALSE	FALSE	FALSE	FALSE	0
1038	HUPE	19	1	2	RJ	2	1	2	1	1		0	0		17	2	1	1	3	1	0	FALSE	FALSE	FALSE	FALSE	0
1039	HUPE	21	1	1	RJ	2	1	2	1	1		0	0		18	2	1	1	3	1	0	FALSE	FALSE	FALSE	FALSE	0
1040	HUPE	32	2	2	RJ	1	1	1	1	2		1	1	1	18	2	1		3	1	0	FALSE	FALSE	FALSE	FALSE	0
1041	HUPE	21	1	2	RJ	1	1	1	1	2		2	0		12	1	1		3	1	0	FALSE	FALSE	FALSE	FALSE	0
1042	HUPE	33	2	1	RJ	1	1	2	1	1		1	0		17	2	1	1	1	1	0	FALSE	FALSE	FALSE	FALSE	0
1043	HUPE	26	2	1	ALAGOAS	1	1	2	1	1		1	0		18	2	1		3	1	0	FALSE	FALSE	TRUE	FALSE	1
1044	HUPE	20	1	2	RJ	1	1	2	1	2		1	1	2	16	2	1	1	3	2	0	FALSE	FALSE	FALSE	FALSE	0
1045	HUPE	28	2	1	RJ	2	1	2	1	1		0	0		16	2	1		1	1	0	FALSE	FALSE	TRUE	FALSE	1
1046	HUPE	16	1	2	RJ			1	2	1		0	1	1	7	1	1	1	3	2	0	FALSE	FALSE	FALSE	TRUE	1
1047	HUPE	41	2	2	PARAIBA	1	1	2	1	2		1	1	1	19	2	1	1	3	2	0	FALSE	FALSE	FALSE	FALSE	0
1048	HUPE	33	2	2	RJ	1	1	1	1	2		2	1	2	15	1	1	1	3	1	0	FALSE	FALSE	FALSE	FALSE	0
1049	HUPE	29	2	1	RJ	3	2	2	1	2		2	1	1	17	2	1	1	3	1	0	FALSE	FALSE	FALSE	FALSE	0
1050	HUPE	34	2	2	RJ	1	1	2	1	1		1	0	2	21	2	1	1	3	1	0	FALSE	FALSE	FALSE	FALSE	0
1051	HUPE	18	1	1	RJ	1	1	2	1	2		0	1	2	14	1	1	1	3	1	0	FALSE	FALSE	FALSE	FALSE	0
1052	HUPE	30	2	2	RJ	3	2	2	1	1		0	0		15	1	1	2	3	2	0	FALSE	FALSE	TRUE	FALSE	1
1053	HUPE	43	2	2	RJ	4	2	2	1					2	26	2	1	1	3	1	0	FALSE	FALSE	FALSE	FALSE	0
1054	HUPE	32	2	1	RJ	1	1	2	2	1		0	1	1	16	2	1	1	3	1	0	FALSE	FALSE	FALSE	FALSE	0
1055	HUPE	31	2	1	RJ	1	1	2	2	2		1	1	2	16	2	1	2	3	2	0	FALSE	FALSE	FALSE	FALSE	0
1056	HUPE	32	2	2	RJ	2	1	1	1	2		1	1	4	18	2	1	1	3	2	0	FALSE	FALSE	FALSE	FALSE	0
1057	HUPE	21	1	2	RJ	1	1	1	2	1		0	0	2	14	1	1	1	3	2	0	FALSE	FALSE	FALSE	FALSE	0
1058	HUPE	21	1	2	RJ	3	2	1	1					4	14	1	1	1	3	1	0	FALSE	FALSE	FALSE	FALSE	0
1059	HUPE	29	2	1	RJ	1	1	2	1	2		2	1	1	15	1	1	1	3	1	0	FALSE	FALSE	FALSE	FALSE	0
1060	HUPE	28	2	1	RJ	1	1	1	1	2		2	1	1	16	2	1	1	1	1	0	FALSE	FALSE	TRUE	FALSE	1
1061	HUPE	27	2	2	BAHIA	1	1	2	1	1		0	1	1	16	2	1	2	3	2	0	FALSE	FALSE	FALSE	FALSE	0
1062	HUPE	26	2	2	RJ	1	1	2	1	1		1	0		15	1	1		3	1	0	FALSE	FALSE	FALSE	FALSE	0
1063	HUPE	18	1	2	RJ	1	1	1	1	1		0	0		15	1	1	1	3	2	0	FALSE	FALSE	FALSE	FALSE	0
1064	HUPE	27	2	2	RJ	1	1	1	1	2		3	0		14	1	1	1	3	1	0	FALSE	FALSE	FALSE	FALSE	0
1065	HUPE	28	2	2	RJ	2	1	2	1	1		0	1	1	15	1	1	1	3	1	0	FALSE	FALSE	FALSE	FALSE	0
1066	HUPE	29	2	2	RJ	3	2	2	1	1		1	0		14	1	1	2	3	1	0	FALSE	FALSE	FALSE	FALSE	0
1067	HUPE	30	2	2	RJ	2	1	2	1	2		4	1	1	15	1	1	2	3	1	0	FALSE	FALSE	FALSE	FALSE	0
1068	HUPE	38	2	2	RJ	2	1	2	2	2					16	2	1	1	3	1	0	FALSE	FALSE	FALSE	FALSE	0
1069	HUPE	41	2	2	RJ	4	2	2	1	2		0	1	9	16	2	1	2	3	2	0	FALSE	FALSE	FALSE	FALSE	0
1070	HUPE	20	1	1	RJ	1	1	2	1	1		0	0		17	2	1	1	3	1	0	FALSE	FALSE	FALSE	FALSE	0
1071	HUPE	31	2	2	RJ	1	1	2	2	2		3	0		12	1	0		3	2	0	FALSE	FALSE	FALSE	FALSE	0
1072	HUPE	31	2	1	RJ	2	1	2	1	1		0	0		18	2	1	1	3	2	0	FALSE	FALSE	FALSE	FALSE	0
1073	HUPE	25	2	2	BAHIA	3	2	2	1	2		0	1	2	17	2	1	1	3	1	0	FALSE	FALSE	FALSE	FALSE	0
1074	HUPE	30	2	1	RJ	1	1	1	1	2		6	0		14	1	1	2	3	2	0	FALSE	FALSE	TRUE	TRUE	1
1075	HUPE	33	2	2	RJ	1	1	2	2	2		5	0		12	1	1		2	1	0	FALSE	FALSE	FALSE	FALSE	0
1076	HUPE	19	1	2	RJ	1	1	2	1						16	2	1	1	3	2	0	FALSE	FALSE	FALSE	FALSE	0
1077	HUPE	30	2	2	RJ	2	1	2	1	2		1	1	1	18	2	1	2	2	1	0	FALSE	FALSE	FALSE	FALSE	0
1078	HUPE	36	2	1	RJ	6	2	2	1						16	2	1	1	3	2	0	FALSE	FALSE	FALSE	TRUE	1
1079	HUPE	30	2	2	MARANHAO	1	1	1	1						14	1	1	2	3	1	0	FALSE	FALSE	FALSE	FALSE	0
1080	HUPE	41	2	2	RJ	5	2	2	1	2		2	0		26	2	1	1	3	1	0	FALSE	FALSE	FALSE	FALSE	0
1081	HUPE	34	2	2	PARAIBA	1	1	1	1						17	2	1	1	3	2	0	FALSE	FALSE	FALSE	FALSE	0
1082	HUPE	39	2	1	RJ	3	2	2	1						23	2	1	2	3	1	0	FALSE	FALSE	FALSE	FALSE	0
1083	HUPE	27	2	2	RJ	1	1	1	1						14	1	1		3	1	0	FALSE	FALSE	FALSE	FALSE	0
1084	HUPE	21	1	2	RJ	2	1	1	2						17	2	1	1	3	2	0	FALSE	FALSE	FALSE	FALSE	0
1085	HUPE	27	2	2	PARAIBA	2	1	2	1						18	2	1	1	1	1	0	FALSE	FALSE	FALSE	FALSE	0
1086	HUPE	38	2	2	MARANHAO	1	1	2	1						23	2	1	1	3	2	0	FALSE	FALSE	FALSE	FALSE	0
1087	HUPE	25	2	2	CHINA	5	2	2	1						18	2	1	1	3	1	0	FALSE	FALSE	FALSE	FALSE	0
1088	HUPE	32	2	2	RJ	1	1	1	1						18	2	1	1	3	2	0	FALSE	FALSE	FALSE	FALSE	0
1089	HUPE	19	1	2	RJ	3	2	2	2						17	2	1	1	3	2	0	FALSE	FALSE	FALSE	FALSE	0
1090	HUPE	23	1	2	RJ	1	1	1	1						12	1	1		3	2	0	FALSE	FALSE	FALSE	FALSE	0
1091	HUPE	40	2	1	RJ	2	1	2	1						15	1	1	2	3	1	0	FALSE	FALSE	FALSE	FALSE	0
1092	HUPE	30	2	2	RJ	1	1	2	2						11	1	1		3	1	0	FALSE	FALSE	FALSE	FALSE	0
1093	HUPE	25	2	2	PIAUI	3	2	2	1						15	1	1	1	3	2	0	FALSE	FALSE	FALSE	FALSE	0
1094	HUPE	31	2	2	RJ	1	1	2	1						18	2	1	1	3	1	0	FALSE	FALSE	FALSE	FALSE	0
1095	HUPE	29	2	1	RJ	2	1	2	1						21	2	1	1	1	1	0	FALSE	FALSE	FALSE	FALSE	0
1096	HUPE	20	1	1	RJ	2	1	2	1						14	1	1	2	3	1	0	FALSE	FALSE	FALSE	FALSE	0
1097	HUPE	29	2	1	RJ	3	2	2	1						19	2	1	1	3	1	0	FALSE	FALSE	FALSE	FALSE	0
1098	HUPE	23	1	1	BAHIA	2	1	2	1						16	2	1	1	3	1	0	FALSE	FALSE	FALSE	FALSE	0
1099	HUPE	32	2	2	PARAIBA	2	1	2	1						21	2	1	1	3	1	0	FALSE	FALSE	FALSE	FALSE	0
1100	HUPE	24	1	2	RJ	2	1	2	2						14	1	1		3	2	0	FALSE	FALSE	FALSE	FALSE	0
1101	HUPE	32	2	1	RJ	1	1	2	2						19	2	1	1	3	2	0	FALSE	FALSE	FALSE	FALSE	0
1102	HUPE	37	2	1	RJ	2	1	2	1						14	1	1	1	3	2	0	FALSE	FALSE	FALSE	FALSE	0
1103	HUPE	41	2	2	MACEIO	3	2	1	1						16	2	1	1	3	2	0	FALSE	FALSE	FALSE	TRUE	1
1104	HUPE	25	2	2	RJ	1	1	1	1						13	1	1	1	3	1	0	FALSE	FALSE	FALSE	FALSE	0
1105	MESQUITA	19	1	2	RJ	1	1	1	1	1		1	1	1	15	1	1	1	3	2	0	FALSE	FALSE	FALSE	FALSE	0
1106	MESQUITA	17	1	2	RJ	1	1	1	2	1		1	0		13	1	1	1	3	1	0	FALSE	FALSE	FALSE	FALSE	0
1107	MESQUITA	22	1	2	RJ	1	1	2	1	1		1	0		16	2	1	1	3	1	0	FALSE	FALSE	FALSE	FALSE	0
1108	MESQUITA	17	1	2	RJ	1	1	2	1	1		1	0		14	1	1	1	3	2	0	FALSE	FALSE	FALSE	FALSE	0
1109	MESQUITA	30	2	1	RJ	4	2	2	1	1		1	0		17	2	1	1	3	1	0	FALSE	FALSE	FALSE	FALSE	0
1110	MESQUITA	32	2	2	RJ	2	1	1	1	2		2	1	0	15	1	1		3	1	0	FALSE	FALSE	FALSE	TRUE	1
1111	MESQUITA	17	1	1	RJ	3	2	2	2						15	1	1	1	3	2	0	FALSE	FALSE	FALSE	FALSE	0
1112	MESQUITA	21	1	2	PERNAMBUCO	1	1	1	1	1		2	0		19	2	1	1	1	1	0	FALSE	FALSE	FALSE	FALSE	0
1113	MESQUITA	28	2	1	RJ	2	1	2	1	1		1	0		18	2	1	2	3	2	0	FALSE	FALSE	FALSE	FALSE	0
1114	MESQUITA	18	1	2	RJ	1	1	1	1	1		1	0		14	1	1	1	3	1	0	FALSE	FALSE	FALSE	TRUE	1
1115	MESQUITA	28	2	1	RJ	2	1	1	2	1		2	0		15	1	1	2	3	1	0	FALSE	FALSE	FALSE	FALSE	0
1116	MESQUITA	17	1	2	RJ	3	2	2	1						16	2	1	1	3	2	0	FALSE	FALSE	FALSE	FALSE	0
1117	MESQUITA	27	2	2	RJ	2	1	2	1	1		2	0		16	2	1	1	3	2	0	FALSE	FALSE	FALSE	FALSE	0
1118	MESQUITA	18	1	2	RJ	1	1	1	1	2		3	0		13	1	1	2	3	1	0	FALSE	FALSE	FALSE	FALSE	0
1119	MESQUITA	20	1	1	RJ	3	2	2	2	1		1	0		17	2	1	1	1	1	0	FALSE	FALSE	FALSE	FALSE	0
1120	MESQUITA	33	2	1	RJ	2	1	2	1						17	2	1	1	3	1	0	FALSE	FALSE	FALSE	FALSE	0
1121	MESQUITA	31	2	2	RJ	2	1	2	1	2		2	1	1	14	1	1	2	3	2	0	FALSE	FALSE	FALSE	FALSE	0
1122	MESQUITA	31	2	2	RJ	2	1	1	1	1		1	0		20	2	1	1	3	1	0	FALSE	FALSE	FALSE	FALSE	0
1123	MESQUITA	16	1	2	RJ	2	1	1	1	1		1	0		15	1	1	1	3	2	0	FALSE	FALSE	FALSE	FALSE	0
1124	MESQUITA	24	1	1	RJ	2	1	2	2						15	1	2		3	1	0	FALSE	FALSE	FALSE	FALSE	0
1125	MESQUITA	24	1	2	RJ	1	1	2	1	1		1	0		16	2	1	2	1	1	0	FALSE	FALSE	FALSE	FALSE	0
1126	MESQUITA	15	1	2	RJ	2	1	1	1	1		2	0		14	1	1	1	3	2	0	FALSE	FALSE	FALSE	FALSE	0
1127	MESQUITA	19	1	1	RJ	1	1	1	1	1		1	0		16	2	1	1	1	1	0	FALSE	FALSE	FALSE	FALSE	0
1128	MESQUITA	18	1	2	RJ	2	1	2	1	1		1	0		16	2	1	1	3	1	0	FALSE	FALSE	FALSE	FALSE	0
1129	MESQUITA	16	1	2	RJ	1	1	1	1	1		1	0		14	1	1	2	3	1	0	FALSE	FALSE	FALSE	FALSE	0
1130	MESQUITA	23	1	2	RJ	1	1	1	2	1		2	0		14	1	3		3	1	0	FALSE	FALSE	FALSE	FALSE	0
1131	MESQUITA	27	2	1	RJ	2	1	2	1	1		1	0		26	2	1	1	3	2	0	FALSE	FALSE	FALSE	FALSE	0
1132	MESQUITA	16	1	1	RJ	2	1	2	1	1		1	0		15	1	1	1	3	1	0	FALSE	FALSE	FALSE	FALSE	0
1133	MESQUITA	19	1	1	RJ	3	2	2	2	1		1	0		17	2	1	1	3	1	0	FALSE	FALSE	FALSE	FALSE	0
1134	MESQUITA	35	2	2	RJ	1	1	2	1	2		3	0		18	2	1	2	3	1	0	FALSE	FALSE	FALSE	FALSE	0
1135	MESQUITA	17	1	1	RJ	1	1	2	1	1		1	0		15	1	1	1	3	1	0	FALSE	FALSE	FALSE	FALSE	0
1136	MESQUITA	38	2	2	RJ	3	2	1	1	2		3	0		19	2	1	2	3	2	0	FALSE	FALSE	FALSE	FALSE	0
1137	MESQUITA	30	2	1	RJ	2	1	2	1	1		1	0		14	1	2		3	1	0	FALSE	FALSE	FALSE	FALSE	0
1138	MESQUITA	38	2	2	RJ	2	1	1	1	2		5	1	0	14	1	1	1	3	2	0	FALSE	FALSE	FALSE	FALSE	0
1139	MESQUITA	23	1	2	RJ	2	1	2	1	1		1	0		18	2	1	1	3	2	0	FALSE	FALSE	FALSE	FALSE	0
1140	MESQUITA	24	1	1	RJ	2	1	2	1	1		2	0		19	2	1	1	2	1	0	FALSE	FALSE	FALSE	FALSE	0
1141	MESQUITA	20	1	2	RJ	1	1	1	1	1		1	0		16	2	1	1	3	1	0	FALSE	FALSE	FALSE	FALSE	0
1142	MESQUITA	16	1	2	RJ	1	1	2	2	1		1	0		15	1	1	1	3	1	0	FALSE	FALSE	FALSE	FALSE	0
1143	MESQUITA	17	1	1	RJ	1	1	2	1	1		1	0		15	1	1	1	3	2	0	FALSE	FALSE	FALSE	FALSE	0
1144	MESQUITA	28	2	2	RJ	1	1	2	1	1		2	0		15	1	1	2	3	1	0	FALSE	FALSE	FALSE	FALSE	0
1145	MESQUITA	31	2	2	RJ	3	2	2	1	1		1	0		27	2	1	1	3	2	0	FALSE	FALSE	FALSE	FALSE	0
1146	MESQUITA	21	1	2	RJ	3	2	1	1	1		2	0		16	2	1	2	3	2	0	FALSE	FALSE	FALSE	FALSE	0
1147	MESQUITA	15	1	1	RJ	1	1	1	1	1		1	0		14	1	1	2	3	1	0	FALSE	FALSE	FALSE	FALSE	0
1148	MESQUITA	32	2	2	PERNAMBUCO	2	1	2	1	1		2	0		20	2	1	1	3	2	0	FALSE	FALSE	FALSE	FALSE	0
1149	MESQUITA	23	1	2	RJ	2	1	2	1	1		1	0		16	2	1	2	3	1	0	FALSE	FALSE	FALSE	FALSE	0
1150	MESQUITA	22	1	2	RJ	3	2	2	2	1		2	0		15	1	2	1	3	1	0	FALSE	FALSE	FALSE	FALSE	0
1151	MESQUITA	31	2	1	RJ	2	1	1	1	1		1	0		17	2	1	1	3	2	0	FALSE	FALSE	FALSE	FALSE	0
1152	MESQUITA	16	1	2	RJ	1	1	1	1	1		1	0		13	1	1	1	3	2	0	FALSE	FALSE	FALSE	FALSE	0
1153	MESQUITA	26	2	2	RJ	1	1	2	1	1		2	0		18	2	1	2	3	1	0	FALSE	FALSE	FALSE	FALSE	0
1154	MESQUITA	19	1	1	RJ	1	1	1	1	2		2	1	1	14	1	1	2	3	2	0	FALSE	FALSE	FALSE	FALSE	0
1155	MESQUITA	22	1	2	RJ	1	1	1	1	1		2	0		15	1	1	2	3	2	0	FALSE	FALSE	FALSE	FALSE	0
1156	MESQUITA	24	1	1	RIO GRANDE DO NORTE	3	2	2	1	1		1	0		18	2	1	1	3	2	0	FALSE	FALSE	FALSE	FALSE	0
1157	MESQUITA	21	1	2	RJ	3	2	1	1	2		3	0		15	1	1	2	3	2	0	FALSE	FALSE	FALSE	FALSE	0
1158	MESQUITA	14	1	2	RJ	1	1	1	2	1		1	0		14	1	1	1	3	2	0	FALSE	FALSE	FALSE	FALSE	0
1159	MESQUITA	25	2	2	RJ	1	1	2	1	1		1	0		22	2	1	1	3	2	0	FALSE	FALSE	FALSE	FALSE	0
1160	MESQUITA	23	1	1	MG	1	1	1	2	2		3	0		14	1	1		3	1	0	FALSE	FALSE	FALSE	FALSE	0
1161	MESQUITA	30	2	2	RJ	1	1	2	1	2		6	0		17	2	1	1	3	2	0	FALSE	FALSE	FALSE	FALSE	0
1162	MESQUITA	16	1	2	RJ	1	1	2	1	1		1	0		16	2	1	1	3	2	0	FALSE	FALSE	FALSE	FALSE	0
1163	MESQUITA	28	2	1	RJ	2	1	2	1	2		3	1	1	16	2	1	2	3	1	0	FALSE	FALSE	FALSE	FALSE	0
1164	MESQUITA	40	2	2	RJ	1	1	1	2	2		4	0		21	2	1		3	2	0	FALSE	FALSE	FALSE	FALSE	0
1165	MESQUITA	18	1	1	RJ	1	1	1	2	1		1	0		14	1	1	1	3	1	0	FALSE	FALSE	FALSE	FALSE	0
1166	MESQUITA	20	1	2	RJ	1	1	2	1	1		1	0		15	1	1	1	3	1	0	FALSE	FALSE	FALSE	TRUE	1
1167	MESQUITA	22	1	2	RJ	1	1	2	1	2		2	1	1	18	2	1	1	3	1	0	FALSE	FALSE	FALSE	FALSE	0
1168	MESQUITA	23	1	2	SALVADOR / BA	1	1	2	1	1		2	0		17	2	1	1	3	2	0	FALSE	FALSE	FALSE	TRUE	1
1169	MESQUITA	29	2	2	RJ	5	2	2	1	1		2	0		21	2	1	1	3	1	0	FALSE	FALSE	FALSE	FALSE	0
1170	MESQUITA	21	1	2	RJ	2	1	2	1	1		1	0		20	2	1	1	3	1	0	FALSE	FALSE	FALSE	FALSE	0
1171	MESQUITA	27	2	2	RJ	1	1	2	1	1		1	0		20	2	1	1	2	2	0	FALSE	FALSE	FALSE	FALSE	0
1172	MESQUITA	17	1	1	RJ	1	1	1	1	1		1	0		16	2	1	1	3	1	0	FALSE	FALSE	FALSE	FALSE	0
1173	MESQUITA	24	1	2	RJ	1	1	1	1	1		1	0		13	1	1	1	3	2	0	FALSE	FALSE	FALSE	FALSE	0
1174	MESQUITA	34	2	2	RJ	1	1	2	2	1		1	0		19	2	1	2	3	1	0	FALSE	FALSE	FALSE	FALSE	0
1175	MESQUITA	22	1	1	RJ	2	1	2	1	1		2	0		18	2	1	1	3	1	0	FALSE	FALSE	FALSE	FALSE	0
1176	MESQUITA	32	2	2	RJ	1	1	2	1	1		2	0		16	2	1	2	3	2	0	FALSE	FALSE	FALSE	FALSE	0
1177	MESQUITA	19	1	2	RJ	2	1	2	1	1		1	0		14	1	1	1	3	2	0	FALSE	FALSE	FALSE	FALSE	0
1178	MESQUITA	27	2	1	RJ	2	1	2	1	1		2	0		15	1	1	2	3	2	0	FALSE	FALSE	FALSE	FALSE	0
1179	MESQUITA	19	1	2	RJ	1	1	1	2	1		1	1		16	2	1	1	3	1	0	FALSE	FALSE	FALSE	FALSE	0
1180	MESQUITA	27	2	2	RJ	1	1	1	1	2		4	1	1	12	1	5		3	1	0	FALSE	FALSE	FALSE	FALSE	0
1181	MESQUITA	16	1	2	RJ	2	1	2	1	1		1	0		14	1	1	1	3	1	0	FALSE	FALSE	FALSE	FALSE	0
1182	MESQUITA	31	2	2	RJ	1	1	1	1	2		5	1	3	15	1	1	2	3	2	0	FALSE	FALSE	FALSE	FALSE	0
1183	MESQUITA	27	2	1	RJ	2	1	2	2	2		3	0		16	2	1	2	3	1	0	FALSE	FALSE	FALSE	FALSE	0
1184	MESQUITA	16	1	1	RJ	1	1	1	2	1		1	1	1	12	1	2		3	1	0	FALSE	FALSE	FALSE	FALSE	0
1185	MESQUITA	18	1	1	RJ	3	2	2	1	1		1	0		17	2	1	1	3	1	0	FALSE	FALSE	FALSE	FALSE	0
1186	MESQUITA	20	1	2	RJ	1	1	1	1	2		3	1	1	14	1	1		3	2	0	FALSE	FALSE	FALSE	FALSE	0
1187	MESQUITA	18	1	2	RJ	1	1	1	1	1		2	0		13	1	1	1	3	1	0	FALSE	FALSE	FALSE	TRUE	1
1188	MESQUITA	17	1	2	RJ	2	1	2	1	1		2	0		14	1	1	1	3	2	0	FALSE	FALSE	FALSE	FALSE	0
1189	MESQUITA	16	1	2	RJ	1	1	1	1	1		1	0		15	1	1	1	3	2	0	FALSE	FALSE	FALSE	FALSE	0
1190	MESQUITA	20	1	2	RJ	1	1	1	1	1		2	0		17	2	1	1	3	2	0	FALSE	FALSE	FALSE	FALSE	0
1191	MESQUITA	23	1	2	RJ	4	2	2	2	1		1	0		16	2	1	2	3	2	0	FALSE	FALSE	FALSE	FALSE	0
1192	MESQUITA	20	1	1	RJ	3	2	2	2	1		1	0		15	1	1	2	3	2	0	FALSE	FALSE	FALSE	FALSE	0
1193	MESQUITA	26	2	2	RJ	1	1	1	2	2		3	1	1	15	1	4		3	2	0	FALSE	FALSE	FALSE	FALSE	0
1194	MESQUITA	19	1	2	RJ	2	1	1	2	1		1	0		13	1	1	2	3	1	0	FALSE	FALSE	FALSE	FALSE	0
1195	MESQUITA	25	2	2	RJ	2	1	1	1	1		2	0		20	2	1	1	3	1	0	FALSE	FALSE	FALSE	FALSE	0
1196	MESQUITA	18	1	2	RJ	2	1	2	2	1		1	0		17	2	1	1	3	1	0	FALSE	FALSE	FALSE	FALSE	0
1197	MESQUITA	23	1	1	RJ	1	1	1	1	2		4	0		15	1	1	1	3	1	0	FALSE	FALSE	FALSE	FALSE	0
1198	MESQUITA	21	1	2	RJ	2	1	1	1	1		2	0		13	1	1	2	3	2	0	FALSE	FALSE	FALSE	FALSE	0
1199	MESQUITA	23	1	2	RJ	2	1	2	2	1		1	0		16	2	2	2	3	1	0	FALSE	FALSE	FALSE	FALSE	0
1200	MESQUITA	32	2	1	RJ	2	1	2	1	2		3	1	2	19	2	1		3	2	0	FALSE	FALSE	FALSE	FALSE	0
1201	MESQUITA	30	2	2	RJ	2	1	1	2	1		1	0		14	1	1	1	3	2	0	FALSE	FALSE	FALSE	FALSE	0
1202	MESQUITA	20	1	2	BAHIA	2	1	2	1	1		1	0		14	1	1	2	3	2	0	FALSE	FALSE	FALSE	FALSE	0
1203	MESQUITA	26	2	1	RJ	4	2	2	1	1		2	0		15	1	1	1	3	1	0	FALSE	FALSE	FALSE	FALSE	0
1204	HUPE	35	2	2	RJ	1	1	1	1	2		1	0		19	2	1	2	3	2	0	FALSE	TRUE	FALSE	FALSE	0
